# Supplementary material for: Is any job better than no job? : A systematic review
Source: bioRxiv or medRxiv preprint supplement (doi:10.1101/2021.11.23.21266736), 2021-11-24
Supplement: Supplementary file [file media-1.pdf]



**Is any job better than no job?  
A systematic review**

**Supplementary material**

## **Contents**

|                                                           |    |
|-----------------------------------------------------------|----|
| Search strategies .....                                   | 3  |
| Studies excluded at full text .....                       | 19 |
| Table S1. Data extraction and analysis .....              | 24 |
| Table S2: Results by objectivity of outcome measure ..... | 38 |
| Table S3: Results by welfare state regime .....           | 42 |

## Search strategies

**Databases:** Medline, Medline In-Process & Other Non-Indexed Citations and Daily & Medline Epub Ahead of Print, Embase, PsycInfo, HMIC, ASSIA, TRIP Database, Google Scholar and websites

### **Database: Ovid MEDLINE(R) and Epub Ahead of Print, In-Process & Other Non-Indexed Citations and Daily <1946 to April 17, 2020>**

Search Strategy:

- 
- 1 Unemployment/ (6785)
  - 2 (unemploy\* or "un employ\*" or "non employ\*" or jobseeker? or "lay off\*" or layoff\* or redundan\* or joblessness).ti,ab,kf. (58417)
  - 3 or/1-2 (60929)
  - 4 ("self employ\*" or freelance\* or "free lance\*" or "sole trader\*" or soletrader\* or entrepreneur\*).ti,ab,kf. (4478)
  - 5 Shift Work Schedule/ or Work Schedule Tolerance/ or Workload/ (26852)
  - 6 Working Poor/ (15)
  - 7 Employment/ (45606)
  - 8 work/ (19864)
  - 9 Occupations/ (22804)
  - 10 or/7-9 (85207)
  - 11 uncertainty/ (12296)
  - 12 contract services/ (10523)
  - 13 or/11-12 (22815)
  - 14 and/10,13 (577)
  - 15 ((poor\* or heavy or bad or wors\* or precari\* or unfav\* or hard or negative or detrimental or advers\* or unsafe\* or dangerous\* or hazard\* or denigrat\* or unfair\* or insecur\* or unstabl\* or uncertain\* or instab\* or negative or disadvantag\* or quality or stress\* or strain or night or overnight or demand\* or control or autonom\* or complex\* or unskill\* or peripheral or contingent or tempor\* or seasonal or "fixed term" or casual or irregular or "long hour?" or unreliable or passive or repetitive or elementary or alienat\* or worr\* or unhealth\* or underpa\* or exploitat\* or overtime or condition?) adj1 (work\* or job? or employ\* or labour\* or labor\* or occupation\* or profession\* or shift?)).ti,ab,kf. (75179)
  - 16 (shift\* adj1 (work\* or job? or employ\*)).ti,ab,kf. (6819)
  - 17 ((low\* or basic or minim\* or subminim\* or bad or wors\* or poor\* or bad or precari\* or unfav\* or hard or negative or detrimental or advers\* or unsafe\* or dangerous\* or hazard\* or reduc\* or depress\* or detrimental\* or denigrat\* or unfair\* or insecur\* or unstabl\* or uncertain\* or instab\* or negative or disadvantag\* or quality or shift? or schedul\* or night or demand\* or strain\* or control or autonom\* or unskill\* or peripheral or contingent or tempor\* or "part time" or "fixed term" or casual or hour? or unreliable or elementa\* or unhealth\* or underpa\* or exploitat\* or overtime) adj1 (salary or salaries or wage? or earning? or contract?)).ti,ab,kf. (2598)
  - 18 or/4-6,14-17 (106233)
  - 19 and/3,18 (1610)
  - 20 exp cohort studies/ (1979919)
  - 21 (cohort? or longitudinal or prospective or retrospective or "follow\* up?").ti,ab,kf. (2285275)
  - 22 Cross-sectional studies/ (324264)
  - 23 ("Cross sectional" or survey? or questionnaire?).ti,ab,kf. (1196220)

- 24 or/20-23 (4007926)
- 25 and/19,24 (864)
- 26 limit 25 to english language (776)
- 27 (exp africa/ or exp asia/ or exp Americas/) not (Europe/ or exp Australia/ or Austria/ or Belgium/ or exp Canada/ or Chile/ or Czech Republic/ or exp Denmark/ or Estonia/ or Finland/ or France/ or exp Germany/ or Greece/ or Hungary/ or Iceland/ or Ireland/ or Israel/ or exp Italy/ or exp Japan/ or Latvia/ or Lithuania/ or Luxembourg/ or Mexico/ or Netherlands/ or New Zealand/ or exp Norway/ or Poland/ or Portugal/ or Slovenia/ or exp Korea/ or Spain/ or Sweden/ or Switzerland/ or Turkey/ or exp United Kingdom/ or exp United States/) (943515)
- 28 26 not 27 (679)
- 29 limit 19 to "reviews (maximizes specificity)" (30)
- 30 28 or 29 (699)

\*\*\*\*\*

**Database: Embase <1974 to 2020 April 17>**

Search Strategy:

- 
- 1 unemployment/ (19538)
  - 2 (unemploy\* or "un employ\*" or "non employ\*" or jobseeker? or "lay off\*" or layoff\* or redundan\* or joblessness).ti,ab,od. (75882)
  - 3 or/1-2 (75884)
  - 4 self employment/ (657)
  - 5 ("self employ\*" or freelance\* or "free lance\*" or "sole trader\*" or soletrader\* or entrepreneur\*).ti,ab,od. (5652)
  - 6 exp shift work/ or workload/ (45026)
  - 7 Working Poor/ (41)
  - 8 parttime employment/ or temporary employment/ (1804)
  - 9 employment/ (60495)
  - 10 occupation/ (38616)
  - 11 work/ (31492)
  - 12 or/9-10 (97389)
  - 13 uncertainty/ (28200)
  - 14 employment contract/ (2)
  - 15 or/13-14 (28202)
  - 16 and/12,15 (196)
  - 17 ((poor\* or heavy or bad or wors\* or precari\* or unfav\* or hard or negative or detrimental or advers\* or unsafe\* or dangerous\* or hazard\* or denigrat\* or unfair\* or insecur\* or unstabl\* or uncertaint\* or instab\* or negative or disadvantag\* or quality or stress\* or strain or night or overnight or demand\* or control or autonom\* or complex\* or unskill\* or peripheral or contingent or tempor\* or seasonal or "fixed term" or casual or irregular or "long hour?" or unreliable or passive or repetitive or elementary or alienat\* or worr\* or unhealth\* or underpa\* or exploitat\* or overtime or condition?) adj1 (work\* or job? or employ\* or labour\* or labor\* or occupation\* or profession\* or shift?).ti,ab,od. (127085)
  - 18 ((low\* or basic or minim\* or subminim\* or bad or wors\* or poor\* or bad or precari\* or unfav\* or hard or negative or detrimental or advers\* or unsafe\* or dangerous\* or hazard\* or reduc\* or depress\* or detrimental\* or denigrat\* or unfair\* or insecur\* or unstabl\* or uncertaint\* or instab\* or negative or disadvantag\* or quality or shift? or schedul\* or night or demand\* or strain\* or control or autonom\* or unskill\* or peripheral or contingent or tempor\* or "part time" or "fixed term" or casual or hour? or unreliable or elementa\* or unhealth\*

or underpa\* or exploitat\* or overtime) adj1 (salary or salaries or wage? or earning? or contract?).ti,ab,od. (3399)

19 (shift\* adj1 (work\* or job? or employ\*).ti,ab,od. (10319)

20 or/4-8,16-19 (178385)

21 and/3,20 (2616)

22 cohort analysis/ (568188)

23 (cohort? or longitudinal or prospective or retrospective or "follow\* up?").ti,ab,od. (3879859)

24 cross-sectional study/ (343646)

25 ("Cross sectional" or survey? or questionnaire?).ti,ab,od. (1734695)

26 or/22-25 (5298158)

27 and/21,26 (1455)

28 limit 27 to english language (1365)

29 (exp africa/ or exp asia/ or exp "South and Central America"/) not (Europe/ or exp Australia/ or Austria/ or Belgium/ or exp Canada/ or Chile/ or Czech Republic/ or exp Denmark/ or Estonia/ or Finland/ or France/ or exp Germany/ or Greece/ or Hungary/ or Iceland/ or Ireland/ or Israel/ or exp Italy/ or exp Japan/ or Latvia/ or Lithuania/ or Luxembourg/ or Mexico/ or Netherlands/ or New Zealand/ or Norway/ or Poland/ or Portugal/ or Slovenia/ or exp Korea/ or Spain/ or Sweden/ or Switzerland/ or Turkey/ or exp United Kingdom/ or exp United States/) (1156687)

30 28 not 29 (1174)

31 limit 21 to "reviews (maximizes specificity)" (51)

32 30 or 31 (1207)

\*\*\*\*\*

**Database: APA PsycInfo <1806 to April Week 2 2020>**

Search Strategy:

-----

1 unemployment/ (4226)

2 (unemploy\* or "un employ\*" or "non employ\*" or jobseeker? or "lay off\*" or layoff\* or redundan\* or joblessness).ti,ab,id. (23459)

3 or/1-2 (23717)

4 self-employment/ (379)

5 ("self employ\*" or freelance\* or "free lance\*" or "sole trader\*" or soletrader\* or entrepreneur\*).ti,ab,id. (10178)

6 work scheduling/ or work load/ or Job Security/ (5249)

7 exp working conditions/ (28820)

8 Quality of Work Life/ (1552)

9 employment/ (15478)

10 occupations/ (8791)

11 or/9-10 (23966)

12 uncertainty/ or doubt/ (8539)

13 and/11-12 (46)

14 ((poor\* or heavy or bad or wors\* or precari\* or unfav\* or hard or negative or detrimental or advers\* or unsafe\* or dangerous\* or hazard\* or denigrat\* or unfair\* or insecur\* or unstabl\* or uncertain\* or instab\* or negative or disadvantag\* or quality or stress\* or strain or night or overnight or demand\* or control or autonom\* or complex\* or unskill\* or peripheral or contingent or tempor\* or seasonal or "fixed term" or casual or irregular or "long hour?" or unreliable or passive or repetitive or elementary or alienat\* or worr\* or unhealth\* or underpa\*

- or exploitat\* or overtime or condition?) adj1 (work\* or job? or employ\* or labour\* or labor\* or occupation\* or profession\* or shift?)).ti,ab,id. (43927)
- 15 (shift\* adj1 (work\* or job? or employ\*)).ti,ab,id. (2587)
- 16 ((low\* or basic or minim\* or subminim\* or bad or wors\* or poor\* or bad or precari\* or unfav\* or hard or negative or detrimental or advers\* or unsafe\* or dangerous\* or hazard\* or reduc\* or depress\* or detrimental\* or denigrat\* or unfair\* or insecur\* or unstabl\* or uncertaint\* or instab\* or negative or disadvantag\* or quality or shift? or schedul\* or night or demand\* or strain\* or control or autonom\* or unskill\* or peripheral or contingent or tempor\* or "part time" or "fixed term" or casual or hour? or unreliable or elementa\* or unhealth\* or underpa\* or exploitat\* or overtime) adj1 (salary or salaries or wage? or earning? or contract?)).ti,ab,id. (2234)
- 17 or/4-8,13-16 (80466)
- 18 and/3,17 (1775)
- 19 cohort analysis/ (1405)
- 20 (cohort? or longitudinal or prospective or retrospective or "follow\* up?").ti,ab,id. (333433)
- 21 ("Cross sectional" or questionnaire? or survey?).ti,ab,id. (543668)
- 22 or/19-21 (803869)
- 23 and/18,22 (652)
- 24 limit 23 to english language (590)
- 25 limit 18 to "reviews (maximizes specificity)" (88)
- 26 24 or 25 (647)

\*\*\*\*\*

**Database: HMIC Health Management Information Consortium <1979 to March 2020>**

Search Strategy:

- 
- 1 exp unemployment/ (1124)
  - 2 (unemploy\* or "un employ\*" or "non employ\*" or jobseeker? or "lay off\*" or layoff\* or redundan\* or joblessness).af. (2895)
  - 3 or/1-2 (2895)
  - 4 ("self employ\*" or freelance\* or "free lance\*" or "sole trader\*" or soletrader\* or entrepreneur\*).af. (586)
  - 5 exp working hours/ (1386)
  - 6 exp occupational diseases/ (4881)
  - 7 illegal employment/ or part time work/ or seasonal employment/ or temporary employment/ (153)
  - 8 exp "conditions of employment"/ (15349)
  - 9 exp Contracts of employment/ (1015)
  - 10 exp Contract conditions/ (58)
  - 11 ((poor\* or heavy or bad or wors\* or precari\* or unfav\* or hard or negative or detrimental or advers\* or unsafe\* or dangerous\* or hazard\* or denigrat\* or unfair\* or insecur\* or unstabl\* or uncertaint\* or instab\* or negative or disadvantag\* or quality or stress\* or strain or night or overnight or demand\* or control or autonom\* or complex\* or unskill\* or peripheral or contingent or tempor\* or seasonal or "fixed term" or casual or irregular or "long hour?" or unreliable or passive or repetitive or elementary or alienat\* or worr\* or unhealth\* or underpa\* or exploitat\* or overtime or condition?) adj1 (work\* or job? or employ\* or labour\* or labor\* or occupation\* or profession\* or shift?)).af. (5478)
  - 12 (shift\* adj1 (work\* or job? or employ\*)).af. (484)

- 13 ((low\* or basic or minim\* or subminim\* or bad or wors\* or poor\* or bad or precari\* or unfav\* or hard or negative or detrimental or advers\* or unsafe\* or dangerous\* or hazard\* or reduc\* or depress\* or detrimental\* or denigrat\* or unfair\* or insecur\* or unstabl\* or uncertaint\* or instab\* or negative or disadvantag\* or quality or shift\* or schedul\* or night or demand\* or strain\* or control or autonom\* or unskill\* or peripheral or contingent or tempor\* or "part time" or "fixed term" or casual or hour? or unreliable or elementa\* or unhealth\* or underpa\* or exploitat\* or overtime) adj1 (salary or salaries or wage? or earning? or contract?)).af. (395)
- 14 or/4-13 (25153)
- 15 and/3,14 (485)
- 16 exp cohort studies/ (1159)
- 17 (cohort? or longitudinal or prospective or retrospective or "follow\* up?").af. (21176)
- 18 ("Cross sectional" or survey? or questionnaire?).af. (46755)
- 19 or/16-18 (61992)
- 20 and/15,19 (82)
- 21 (review or "meta analy\*" or metaanaly\*).ti. (13963)
- 22 (medline or pubmed or embase or cochrane or psycinfo).ab. (2855)
- 23 or/21-22 (14957)
- 24 and/15,23 (4)
- 25 or/20,24 (83)
- 26 (review or "meta analy\*" or metaanaly\*).ti. (13963)
- 27 (medline or pubmed or embase or cochrane or psycinfo).ab. (2855)
- 28 or/21-22 (14957)
- 29 and/15,23 (4)
- 30 or/20,24 (83)

\*\*\*\*\*

### **Applied Social Sciences Index & Abstracts (ASSIA)**

#### Search Strategy

S18 S14 OR S15 OR S16 OR S17 263

S17 S13 AND S7 1

S16 S13 AND S9 195

S15 S13 AND S8 43

S14 S13 AND S6 39

S13 S10 OR S11 OR S12 346,708

S12 ti((review or "meta analys\*" or metanalys\*) OR ab((review or "meta analys\*" or metanalys\*)) 118,989

S11 ti((cohort? OR longitudinal OR prospective OR retrospective OR "follow up" OR "followed up" or "follow ups" OR "followed ups")) OR ab((cohort? OR longitudinal OR prospective OR retrospective OR "follow up" OR "followed up" or "follow ups" OR "followed ups")) 103,802

S10 ti("Cross sectional" or survey? or questionnaire?) OR ab("Cross sectional" or survey? or questionnaire?) 161,450

S9 S1 AND S5 591

S8 S1 AND S4 136

S7 S1 AND S3 7

S6 S1 AND S2 110

S5 ti(((poor\* or heavy or bad or wors\* or precari\* or unfav\* or hard or negative or detrimental or advers\* or unsafe\* or dangerous\* or hazard\* or

denigrat\* or unfair\* or insecur\* or unstabl\* or uncertaint\* or instab\* or negative or disadvantag\* or quality or stress\* or strain or night or overnight or demand\* or control or autonom\* or complex\* or unskill\* or peripheral or contingent or tempor\* or seasonal or "fixed term" or casual or irregular or "long hours" or unreliable or passive or repetitive or elementary or alienat\* or worr\* or unhealth\* or underpa\* or exploitat\* or overtime or condition?) N/1 (work\* or job? or employ\* or labour\* or labor\* or occupation\* or profession\* or shift?))) OR ab(((poor\* or heavy or bad or wors\* or precari\* or unfav\* or hard or negative or detrimental or advers\* or unsafe\* or dangerous\* or hazard\* or denigrat\* or unfair\* or insecur\* or unstabl\* or uncertaint\* or instab\* or negative or disadvantag\* or quality or stress\* or strain or night or overnight or demand\* or control or autonom\* or complex\* or unskill\* or peripheral or contingent or tempor\* or seasonal or "fixed term" or casual or irregular or "long hours" or unreliable or passive or repetitive or elementary or alienat\* or worr\* or unhealth\* or underpa\* or exploitat\* or overtime or condition?) N/1 (work\* or job? or employ\* or labour\* or labor\* or occupation\* or profession\* or shift?))) 18,051

S4 ti(((low\* or basic or minim\* or subminim\* or bad or wors\* or poor\* or bad or precari\* or unfav\* or hard or negative or detrimental or advers\* or unsafe\* or dangerous\* or hazard\* or reduc\* or depress\* or detrimental\* or denigrat\* or unfair\* or insecur\* or unstabl\* or uncertaint\* or instab\* or negative or disadvantag\* or quality or shift? or schedul\* or night or demand\* or strain\* or control or autonom\* or unskill\* or peripheral or contingent or tempor\* or "part time" or "fixed term" or casual or hour? or unreliable or elementa\* or unhealth\* or underpa\* or exploitat\* or overtime) N/1 (salary or salaries or wage? or earning? or contract?))) OR ab(((low\* or basic or minim\* or subminim\* or bad or wors\* or poor\* or bad or precari\* or unfav\* or hard or negative or detrimental or advers\* or unsafe\* or dangerous\* or hazard\* or reduc\* or depress\* or detrimental\* or denigrat\* or unfair\* or insecur\* or unstabl\* or uncertaint\* or instab\* or negative or disadvantag\* or quality or shift? or schedul\* or night or demand\* or strain\* or control or autonom\* or unskill\* or peripheral or contingent or tempor\* or "part time" or "fixed term" or casual or hour? or unreliable or elementa\* or unhealth\* or underpa\* or exploitat\* or overtime) N/1 (salary or salaries or wage? or earning? or contract?))) 1,545

S3 ti((shift\* N/1 (work\* or job? or employ))) OR ab((shift\* N/1 (work\* or job? or employ))) 734

S2 ti(("self employed" OR "self employment") or freelance\* or ("free lance" OR "free lanced" OR "free lancer" OR "free lancers") or ("sole trader" OR "sole traders") or soletrader\* or entrepreneur\*) OR ab(("self employed" OR "self employment") or freelance\* or ("free lance" OR "free lanced" OR "free lancer" OR "free lancers") or ("sole trader" OR "sole traders") or soletrader\* or entrepreneur\*) 2,722

S1 ti((unemploy\* or "un employment" or "un employed" or "non employed" or "non employment" or jobseeker? or "lay off" or layoff\* or redundan\* or joblessness)) OR ab((unemploy\* or "un employment" or "un employed" or "non employed" or "non employment" or jobseeker? or "lay off" or layoff\* or redundan\* or joblessness)) 8,201-----

### TRIP Database Search

#3 #1 AND #2 50

#2 (Title:work\* or job? or employ\* or labour\* or labor\* or occupation\* or profession\* or shift? or salary or salaries or wage? or earning? or contract?)



#1 (title:unemploy\* or "un employment" or "un employed" or "non employed" or "non employment" or jobseeker? or "lay off" or layoff\* or redundan\* or joblessness)

\*\*\*\*\*

### **Google scholar searches**

#### Singular

allintitle:Insecure job unemployment 4  
allintitle:Insecure work unemployment 1  
allintitle:Insecure employment unemployment 2  
allintitle:Insecurity job unemployment 77  
allintitle:Insecurity work unemployment 10  
allintitle:Insecurity employment unemployment 11  
allintitle:bad job unemployment 1  
allintitle:bad work unemployment 4  
allintitle:bad employment unemployment 5  
allintitle:Precarious job unemployment 1  
allintitle:Precarious work unemployment 19  
allintitle:Precarious employment unemployment 20  
allintitle:Insecure job no 3  
allintitle:Insecure work no 2  
allintitle:Insecure employment no 2  
allintitle:bad job no 6  
allintitle:bad work no 27  
allintitle:bad employment no 3  
allintitle:Precarious job no 0  
allintitle:Precarious work no 10  
allintitle:Precarious employment no 7

#### Plural

allintitle:Insecure jobs unemployment 6  
allintitle:Insecure works unemployment 0  
allintitle:Insecure employments unemployment 0  
allintitle:Insecurity jobs unemployment 0  
allintitle:Insecurity works unemployment 0  
allintitle:Insecurity employments unemployment 0  
allintitle:bad jobs unemployment 11  
allintitle:bad works unemployment 0  
allintitle:bad employments unemployment 0  
allintitle:Precarious jobs unemployment 5  
allintitle:Precarious works unemployment 0  
allintitle:Precarious employments unemployment 0  
allintitle:Insecure jobs no 1  
allintitle:Insecure works no 0

allintitle:Insecure employments no 0  
 allintitle:bad jobs no 44  
 allintitle:bad works no 6  
 allintitle:bad employments no 1  
 allintitle:Precarious jobs no 0  
 allintitle:Precarious works no 0  
 allintitle:Precarious employments no 0  
 allintitle:work conditions unemployment 17  
 allintitle:job conditions unemployment 5  
 allintitle:employment conditions unemployment 41  
 allintitle:work quality unemployment 19  
 allintitle:job quality unemployment 68  
 allintitle:employment quality unemployment 25

Update Search 2021  
 Date: 14-20 May 2021

Databases: Medline (Proquest Dialog), Embase (Proquest Dialog), PsycInfo (Proquest Dialog), HMIC (OVID), ASSIA (Proquest), TRIP Database, Google Scholar and websites

**Medline ( Proquest Dialog 1946-Current)**

S1 MESH.EXACT("Unemployment") 7204  
 S2 TI,AB,SU(unemploy\* or "un employ\*" or "non employ\*" or jobseeker[\*1] or "lay off\*" or layoff\* or redundan\* or joblessness) 66094  
 S3 S2 OR S1 66094  
 S4 TI,AB,SU("self employ\*" or freelance\* or "free lance\*" or "sole trader\*" or soletrader\* or entrepreneur\*) 6517  
 S5 (MESH.EXACT("Work Schedule Tolerance")) OR MESH.EXACT("Workload") OR (MESH.EXACT("Shift Work Schedule")) 28373  
 S6 (MESH.EXACT("Working Poor")) 16  
 S7 MESH.EXACT("Employment") 47222  
 S8 MESH.EXACT("Work") 20108  
 S9 MESH.EXACT("Occupations") 23360  
 S10 S9 OR S8 OR S7 87522  
 S11 MESH.EXACT("uncertainty") 13793  
 S12 MESH.EXACT("contract services") 10539  
 S13 S12 OR S11 24328  
 S14 S13 AND S10 586  
 S15 TI,AB((poor\* or heavy or bad or wors\* or precari\* or unfav\* or hard or negative or detrimental or advers\* or unsafe\* or dangerous\* or hazard\* or denigrat\* or unfair\* or insecur\* or unstabl\* or uncertaint\* or instab\* or negative or disadvantag\* or quality or stress\* or strain or night or overnight or demand\* or control or autonom\* or complex\* or unskill\* or peripheral or contingent or tempor\* or seasonal or "fixed term" or casual or irregular or "long hour[\*1]" or unreliable or passive or repetitive or elementary or alienat\* or worr\* or unhealth\* or underpa\* or exploitat\* or overtime or condition[\*1]) Near/1 (work\* or job[\*1] or employ\* or labour\* or labor\* or occupation\* or profession\* or shift[\*1])) 130723  
 S16 TI,AB,SU(shift\* Near/1 (work\* or job[\*1] or employ\*)) 9037

S17 TI,AB((low\* or basic or minim\* or subminim\* or bad or wors\* or poor\* or bad or precari\* or unfav\* or hard or negative or detrimental or advers\* or unsafe\* or dangerous\* or hazard\* or reduc\* or depress\* or detrimental\* or denigrat\* or unfair\* or insecur\* or unstabl\* or uncertain\* or instab\* or negative or disadvantage\* or quality or shift[\*1] or schedul\* or night or demand\* or strain\* or control or autonom\* or unskill\* or peripheral or contingent or tempor\* or "part time" or "fixed term" or casual or hour[\*1] or unreliable or elementa\* or unhealth\* or underpa\* or exploitat\* or overtime) Near/1 (salary or salaries or wage[\*1] or earning[\*1] or contract[\*1])) 3953

S18 S17 OR S16 OR S15 OR S14 OR S6 OR S5 OR S4 165564

S19 S18 AND S3 2340

S20 (MESH.EXACT.EXPLODE("Cohort Studies")) 2127953

S21 TI,AB(cohort[\*1] or longitudinal or prospective or retrospective or "follow\* up[\*1]") 2509672

S22 (MESH.EXACT.EXPLODE("Cross-sectional studies")) 363786

S23 TI,AB("Cross sectional" or survey[\*1] or questionnaire[\*1]) 1313512

S24 rtype.exact("Systematic Review") 152912

S25 TI((systematic or rapid) Near/3 (review or meta\*)) 159839

S26 rtype.exact("Meta-analysis") 131422

S27 TI(meta-analys\* or metaanalys\*) 128737

S28 S27 OR S26 OR S25 OR S24 OR S23 OR S22 OR S21 OR S20 4573207

S29 S28 AND S19 1237

S30 (MESH.EXACT.EXPLODE("africa") or MESH.EXACT.EXPLODE("asia") or MESH.EXACT.EXPLODE("Americas")) not (MESH.EXACT("Europe") or MESH.EXACT.EXPLODE("Australia") or MESH.EXACT("Austria") or MESH.EXACT("Belgium") or MESH.EXACT.EXPLODE("Canada") or MESH.EXACT("Chile") or MESH.EXACT("Czech Republic") or MESH.EXACT.EXPLODE("Denmark") or MESH.EXACT("Estonia") or MESH.EXACT("Finland") or MESH.EXACT("France") or MESH.EXACT.EXPLODE("Germany") or MESH.EXACT("Greece") or MESH.EXACT("Hungary") or MESH.EXACT("Iceland") or MESH.EXACT("Ireland") or MESH.EXACT("Israel") or MESH.EXACT.EXPLODE("Italy") or MESH.EXACT.EXPLODE("Japan") or MESH.EXACT("Latvia") or MESH.EXACT("Lithuania") or MESH.EXACT("Luxembourg") or MESH.EXACT("Mexico") or MESH.EXACT("Netherlands") or MESH.EXACT("New Zealand") or MESH.EXACT.EXPLODE("Norway") or MESH.EXACT("Poland") or MESH.EXACT("Portugal") or MESH.EXACT("Slovenia") or MESH.EXACT.EXPLODE("Korea") or MESH.EXACT("Spain") or MESH.EXACT("Sweden") or MESH.EXACT("Switzerland") or MESH.EXACT("Turkey") or MESH.EXACT.EXPLODE("United Kingdom") or MESH.EXACT.EXPLODE("United States")) 1032118

S31 S29 not S30 1095

S32 (S31) and (la.exact("English")) 1003°

\*\*\*\*\*

**Embase (Proquest Dialog 1947-current)**

S1 EMB.EXACT("unemployment") 23804\*

S2 TI,AB,SU(unemploy\* or "un employ\*" or "non employ\*" or jobseeker[\*1] or "lay off\*" or layoff\* or redundan\* or joblessness) 85122\*

S3 S2 OR S1 85122\*

S4 (EMB.EXACT("self employment")) 805°

S5 TI,AB,SU("self employ\*" or freelance\* or "free lance\*" or "sole trader\*" or soletrader\* or entrepreneur\*) 6476\*

S6 (EMB.EXACT("shift work")) OR EMB.EXACT("workload") 53461\*  
S7 EMB.EXACT("Working Poor") 50°  
S8 EMB.EXACT("parttime employment") OR EMB.EXACT("temporary employment") 2973°  
S9 EMB.EXACT("employment") 78909\*  
S10 EMB.EXACT("occupation")72849\*  
S11 EMB.EXACT("work") 49802\*  
S12 S11 OR S10 OR S9 190384\*  
S13 EMB.EXACT("uncertainty") 40028\*  
S14 EMB.EXACT("employment contract") 35°  
S15 S14 OR S13 40063\*  
S16 S15 AND S12 353°  
S17 TI,AB((poor\* or heavy or bad or wors\* or precari\* or unfav\* or hard or negative or detrimental or advers\* or unsafe\* or dangerous\* or hazard\* or denigrat\* or unfair\* or insecur\* or unstabl\* or uncertaint\* or instab\* or negative or disadvantage\* or quality or stress\* or strain or night or overnight or demand\* or control or autonom\* or complex\* or unskill\* or peripheral or contingent or tempor\* or seasonal or "fixed term" or casual or irregular or "long hour[\*1]" or unreliable or passive or repetitive or elementary or alienat\* or worr\* or unhealth\* or underpa\* or exploitat\* or overtime or condition[\*1]) Near/1 (work\* or job[\*1] or employ\* or labour\* or labor\* or occupation\* or profession\* or shift[\*1])) 171255\*  
S18 TI,AB((low\* or basic or minim\* or subminim\* or bad or wors\* or poor\* or bad or precari\* or unfav\* or hard or negative or detrimental or advers\* or unsafe\* or dangerous\* or hazard\* or reduc\* or depress\* or detrimental\* or denigrat\* or unfair\* or insecur\* or unstabl\* or uncertaint\* or instab\* or negative or disadvantage\* or quality or shift[\*1] or schedul\* or night or demand\* or strain\* or control or autonom\* or unskill\* or peripheral or contingent or tempor\* or "part time" or "fixed term" or casual or hour[\*1] or unreliable or elementa\* or unhealth\* or underpa\* or exploitat\* or overtime) Near/1 (salary or salaries or wage[\*1] or earning[\*1] or contract[\*1])) 4757°  
S19 TI,AB,SU(shift\* Near/1 (work\* or job[\*1] or employ\*)) 15015\*  
S20 S19 OR S18 OR S17 OR S16 OR S8 OR S7 OR S6 OR S5 OR S4 236374\*  
S21 S20 AND S3 3340°  
S22 (EMB.EXACT("cohort analysis")) 733851\*  
S23 TI,AB(cohort[\*1] or longitudinal or prospective or retrospective or "follow\* up[\*1]") 3956389\*  
S24 (EMB.EXACT("cross-sectional study")) 420674\*  
S25 TI,AB("Cross sectional" or survey[\*1] or questionnaire[\*1]) 1828153\*  
S26 rtype.exact("Systematic Review") 0°  
S27 (EMB.EXACT("systematic review")) 319992\*  
S28 TI((systematic or rapid) Near/3 (review or meta\*)) 190380\*  
S29 (EMB.EXACT("meta analysis")) 249750\*  
S30 TI(meta-analys\* or metaanalys\*) 160386\*  
S31 S30 OR S29 OR S28 OR S27 OR S26 OR S25 OR S24 OR S23 OR S22 5839581\*  
S32 S31 AND S21 1821°  
S33 (S32) and (la.exact("English")) 1720°  
S34 (EMB.EXACT.EXPLODE("africa") or EMB.EXACT.EXPLODE("asia") or EMB.EXACT.EXPLODE("South and Central America")) not (EMB.EXACT("Europe") or EMB.EXACT.EXPLODE("Australia") or EMB.EXACT("Austria") or EMB.EXACT("Belgium") or EMB.EXACT.EXPLODE("Canada") or

EMB.EXACT("Chile") or EMB.EXACT("Czech Republic") or  
 EMB.EXACT.EXPLODE("Denmark") or EMB.EXACT("Estonia") or  
 EMB.EXACT("Finland") or EMB.EXACT("France") or  
 EMB.EXACT.EXPLODE("Germany") or EMB.EXACT("Greece") or  
 EMB.EXACT("Hungary") or EMB.EXACT("Iceland") or EMB.EXACT("Ireland") or  
 EMB.EXACT("Israel") or EMB.EXACT.EXPLODE("Italy") or  
 EMB.EXACT.EXPLODE("Japan") or EMB.EXACT("Latvia") or  
 EMB.EXACT("Lithuania") or EMB.EXACT("Luxembourg") or EMB.EXACT("Mexico")  
 or EMB.EXACT("Netherlands") or EMB.EXACT("New Zealand") or  
 EMB.EXACT("Norway") or EMB.EXACT("Poland") or EMB.EXACT("Portugal") or  
 EMB.EXACT("Slovenia") or EMB.EXACT.EXPLODE("Korea") or EMB.EXACT("Spain")  
 or EMB.EXACT("Sweden") or EMB.EXACT("Switzerland") or EMB.EXACT("Turkey")  
 or EMB.EXACT.EXPLODE("United Kingdom") or EMB.EXACT.EXPLODE("United  
 States")) 1416408\*  
 S35 S33 not S34 1481°  
 \*\*\*\*\*

### **PsycInfo (Proquest Dialog)**

Set# Searched for Results  
 S1 SU.EXACT("Unemployment") 5904  
 S2 TI,AB,SU(unemploy\* or "un employ\*" or "non employ\*" or jobseeker[\*1]  
 or "lay off\*" or layoff\* or redundan\* or joblessness) 25471  
 S3 S2 OR S1 25471  
 S4 SU.EXACT("Self-Employment") 484  
 S5 TI,AB,SU("self employ\*" or freelance\* or "free lance\*" or "sole trader\*" or  
 soletrader\* or entrepreneur\*) 11392  
 S6 (SU.EXACT("work scheduling")) OR (SU.EXACT("work load")) OR  
 (SU.EXACT("Job security")) 5749  
 S7 (SU.EXACT.EXPLODE("Working Conditions")) 30443  
 S8 (SU.EXACT("Quality of Work Life")) 1651  
 S9 (SU.EXACT("employment")) 13001  
 S10 (SU.EXACT("occupations")) 13043  
 S11 S10 OR S9 25432  
 S12 SU.EXACT("uncertainty") OR SU.EXACT("doubt") 11392  
 S13 S12 AND S11 63  
 S14 TI,AB((poor\* or heavy or bad or wors\* or precari\* or unfav\* or hard or  
 negative or detrimental or advers\* or unsafe\* or dangerous\* or hazard\* or  
 denigrat\* or unfair\* or insecur\* or unstabl\* or uncertaint\* or instab\* or negative  
 or disadvantag\* or quality or stress\* or strain or night or overnight or demand\*  
 or control or autonom\* or complex\* or unskill\* or peripheral or contingent or  
 tempor\* or seasonal or "fixed term" or casual or irregular or "long hour[\*1]" or  
 unreliable or passive or repetitive or elementary or alienat\* or worr\* or unhealth\*  
 or underpa\* or exploitat\* or overtime or condition[\*1]) Near/1 (work\* or job[\*1]  
 or employ\* or labour\* or labor\* or occupation\* or profession\* or shift[\*1]))  
 66094  
 S15 TI,AB(shift\* Near/1 (work\* or job[\*1] or employ\*))3322  
 S16 TI,AB((low\* or basic or minim\* or subminim\* or bad or wors\* or poor\* or  
 bad or precari\* or unfav\* or hard or negative or detrimental or advers\* or unsafe\*  
 or dangerous\* or hazard\* or reduc\* or depress\* or detrimental\* or denigrat\* or  
 unfair\* or insecur\* or unstabl\* or uncertaint\* or instab\* or negative or  
 disadvantag\* or quality or shift[\*1] or schedul\* or night or demand\* or strain\* or  
 control or autonom\* or unskill\* or peripheral or contingent or tempor\* or "part

time" or "fixed term" or casual or hour[\*1] or unreliable or elementa\* or unhealth\* or underpa\* or exploitat\* or overtime) Near/1 (salary or salaries or wage[\*1] or earning[\*1] or contract[\*1])) 3124  
S17 S16 OR S15 OR S14 OR S13 OR S8 OR S7 OR S6 OR S5 OR S4 105168  
S18 S17 AND S3 2370  
S19 (SU.EXACT("Cohort Analysis")) 1546  
S20 TI,AB(cohort[\*1] or longitudinal or prospective or retrospective or "follow\* up[\*1]") 353216  
S21 TI,AB("Cross sectional" or questionnaire[\*1] or survey[\*1]) 580097  
S22 (SU.EXACT("Systematic Review")) 31483  
S23 TI((systematic or rapid) Near/3 (review or meta\*)) 25840  
S24 (SU.EXACT("Meta Analysis")) 27526  
S25 TI(meta-analys\* or metaanalys\*) 20211  
S26 S25 OR S24 OR S23 OR S22 OR S21 OR S20 OR S19 900878  
S27 S26 AND S18 890  
S28 (S27) and (la.exact("English")) 838°

\*\*\*\*\*

**HMIC (OVID) Health Management Information Consortium <1979 to March 2021>**

- 1 systematic reviews/ (3196)
- 2 meta analysis/ (778)
- 3 exp unemployment/ (1140)
- 4 (unemploy\* or "un employ\*" or "non employ\*" or jobseeker? or "lay off\*" or layoff\* or redundan\* or joblessness).af. (2928)
- 5 or/3-4 (2928)
- 6 ("self employ\*" or freelance\* or "free lance\*" or "sole trader\*" or soletrader\* or entrepreneur\*).af. (598)
- 7 exp working hours/ (1394)
- 8 exp occupational diseases/ (4881)
- 9 illegal employment/ or part time work/ or seasonal employment/ or temporary employment/ (154)
- 10 exp "conditions of employment"/ (15511)
- 11 exp Contracts of employment/ (1020)
- 12 exp Contract conditions/ (58)
- 13 ((poor\* or heavy or bad or wors\* or precari\* or unfav\* or hard or negative or detrimental or advers\* or unsafe\* or dangerous\* or hazard\* or denigrat\* or unfair\* or insecur\* or unstabl\* or uncertaint\* or instab\* or negative or disadvantag\* or quality or stress\* or strain or night or overnight or demand\* or control or autonom\* or complex\* or unskill\* or peripheral or contingent or tempor\* or seasonal or "fixed term" or casual or irregular or "long hour?" or unreliable or passive or repetitive or elementary or alienat\* or worr\* or unhealth\* or underpa\* or exploitat\* or overtime or condition?) adj1 (work\* or job? or employ\* or labour\* or labor\* or occupation\* or profession\* or shift?)).af. (5578)
- 14 (shift\* adj1 (work\* or job? or employ\*)).af. (485)
- 15 ((low\* or basic or minim\* or subminim\* or bad or wors\* or poor\* or bad or precari\* or unfav\* or hard or negative or detrimental or advers\* or unsafe\* or dangerous\* or hazard\* or reduc\* or depress\* or detrimental\* or denigrat\* or unfair\* or insecur\* or unstabl\* or uncertaint\* or instab\* or negative or disadvantag\* or quality or shift\* or schedul\* or night or demand\* or strain\* or control or autonom\* or unskill\* or peripheral or contingent or tempor\* or "part

time" or "fixed term" or casual or hour? or unreliable or elementa\* or unhealth\* or underpa\* or exploitat\* or overtime) adj1 (salary or salaries or wage? or earning? or contract?).af. (402)  
 16 or/6-15 (25389)  
 17 and/5,16 (494)  
 18 exp cohort studies/ (1160)  
 19 (cohort? or longitudinal or prospective or retrospective or "follow\* up?").af. (21368)  
 20 ("Cross sectional" or survey? or questionnaire?).af. (47267)  
 21 or/18-20 (62620)  
 22 and/17,21 (87)  
 23 systematic reviews/ or meta analysis/ (3607)  
 24 (review or "meta analy\*" or metaanaly\*).ti. (14168)  
 25 (medline or pubmed or embase or cochrane or psycinfo).ab. (2918)  
 26 or/23-25 (15819)  
 27 and/17,26 (5)  
 28 or/22,27 (89)

\*\*\*\*\*

**Applied Social Sciences Index & Abstracts (ASSIA) (Proquest 1987-current)**

S1 ti((unemploy\* or "un employment" or "un employed" or "non employed" or "non employment" or jobseeker[\*1] or "lay off" or layoff\* or redundan\* or joblessness)) OR ab((unemploy\* or "un employment" or "un employed" or "non employed" or "non employment" or jobseeker[\*1] or "lay off" or layoff\* or redundan\* or joblessness)) Applied Social Sciences Index & Abstracts (ASSIA) 8546

S2 ti(("self employed" OR "self employment") or freelance\* or ("free lance" OR "free lanced" OR "free lancer" OR "free lancers") or ("sole trader" OR "sole traders") or soletrader\* or entrepreneur\*) OR ab(("self employed" OR "self employment") or freelance\* or ("free lance" OR "free lanced" OR "free lancer" OR "free lancers") or ("sole trader" OR "sole traders") or soletrader\* or entrepreneur\*) Applied Social Sciences Index & Abstracts (ASSIA) 2872

S3 ti((shift\* N/1 (work\* or job[\*1] or employ))) OR ab((shift\* N/1 (work\* or job[\*1] or employ))) Applied Social Sciences Index & Abstracts (ASSIA) 793

S4 ti(((low\* or basic or minim\* or subminim\* or bad or wors\* or poor\* or bad or precari\* or unfav\* or hard or negative or detrimental or advers\* or unsafe\* or dangerous\* or hazard\* or reduc\* or depress\* or detrimental\* or denigrat\* or unfair\* or insecur\* or unstabl\* or uncertain\* or instab\* or negative or disadvantag\* or quality or shift[\*1] or schedul\* or night or demand\* or strain\* or control or autonom\* or unskill\* or peripheral or contingent or tempor\* or "part time" or "fixed term" or casual or hour[\*1] or unreliable or elementa\* or unhealth\* or underpa\* or exploitat\* or overtime) N/1 (salary or salaries or wage[\*1] or earning[\*1] or contract[\*1]))) OR ab((((low\* or basic or minim\* or subminim\* or bad or wors\* or poor\* or bad or precari\* or unfav\* or hard or negative or detrimental or advers\* or unsafe\* or dangerous\* or hazard\* or reduc\* or depress\* or detrimental\* or denigrat\* or unfair\* or insecur\* or unstabl\* or uncertain\* or instab\* or negative or disadvantag\* or quality or shift[\*1] or schedul\* or night or demand\* or strain\* or control or autonom\* or unskill\* or peripheral or contingent or tempor\* or "part time" or "fixed term" or casual or hour[\*1] or unreliable or elementa\* or unhealth\* or underpa\* or exploitat\* or overtime) N/1 (salary or

salaries or wage[\*1] or earning[\*1] or contract[\*1])) Applied Social Sciences Index & Abstracts (ASSIA) 1607

S5 ti(((poor\* or heavy\* or bad or wors\* or precari\* or unfav\* or hard or negative or detrimental or advers\* or unsafe\* or dangerous\* or hazard\* or denigrat\* or unfair\* or insecure\* or unstabl\* or uncertain\* or instab\* or negative or disadvantag\* or quality or stress\* or strain or night or overnight or demand\* or control or autonom\* or complex\* or unskill\* or peripheral or contingent or tempor\* or seasonal or "fixed term" or casual or irregular or "long hours" or unreliable or passive or repetitive or elementary or alienat\* or worr\* or unhealth\* or underpa\* or exploitat\* or overtime or condition[\*1]) N/1 (work\* or job[\*1] or employ\* or labour\* or labor\* or occupation\* or profession\* or shift[\*1])) OR ab(((poor\* or heavy or bad or wors\* or precari\* or unfav\* or hard or negative or detrimental or advers\* or unsafe\* or dangerous\* or hazard\* or denigrat\* or unfair\* or insecure\* or unstabl\* or uncertain\* or instab\* or negative or disadvantag\* or quality or stress\* or strain or night or overnight or demand\* or control or autonom\* or complex\* or unskill\* or peripheral or contingent or tempor\* or seasonal or "fixed term" or casual or irregular or "long hours" or unreliable or passive or repetitive or elementary or alienat\* or worr\* or unhealth\* or underpa\* or exploitat\* or overtime or condition[\*1]) N/1 (work\* or job[\*1] or employ\* or labour\* or labor\* or occupation\* or profession\* or shift[\*1])) Applied Social Sciences Index & Abstracts (ASSIA) 18955

S6 S1 AND S2 Applied Social Sciences Index & Abstracts (ASSIA)

These databases are searched for part of your query. 119

S7 S1 AND S3 Applied Social Sciences Index & Abstracts (ASSIA)

These databases are searched for part of your query. 7

S8 S1 AND S4 Applied Social Sciences Index & Abstracts (ASSIA)

These databases are searched for part of your query. 140

S9 S1 AND S5 Applied Social Sciences Index & Abstracts (ASSIA)

These databases are searched for part of your query. 612

S10 ti("Cross sectional" or survey[\*1] or questionnaire[\*1]) OR ab("Cross sectional" or survey[\*1] or questionnaire[\*1]) Applied Social Sciences Index & Abstracts (ASSIA) 173339

S11 ti((cohort[\*1] OR longitudinal OR prospective OR retrospective OR "follow up" OR "followed up" or "follow ups" OR "followed ups")) OR ab((cohort[\*1] OR longitudinal OR prospective OR retrospective OR "follow up" OR "followed up" or "follow ups" OR "followed ups")) Applied Social Sciences Index & Abstracts (ASSIA) 111201

S12 ti((review or ("meta analyses" OR "meta analysis") or metanalys\*)) OR ab((review or ("meta analyses" OR "meta analysis") or metanalys\*)) Applied Social Sciences Index & Abstracts (ASSIA) 125351

S13 S10 OR S11 OR S12 Applied Social Sciences Index & Abstracts (ASSIA)

These databases are searched for part of your query. 368983

S14 S13 AND S6 Applied Social Sciences Index & Abstracts (ASSIA)

These databases are searched for part of your query. 42

S15 S13 AND S8 Applied Social Sciences Index & Abstracts (ASSIA)

These databases are searched for part of your query. 42

S16 S13 AND S9 Applied Social Sciences Index & Abstracts (ASSIA)

These databases are searched for part of your query. 203

S17 S13 AND S7 Applied Social Sciences Index & Abstracts (ASSIA)

These databases are searched for part of your query. 1

\*\*\*\*\*



## **TRIP Database Search**

#3 #1 AND #2 64

#2 (Title:work\* or job? or employ\* or labour\* or labor\* or occupation\* or profession\* or shift? or salary or salaries or wage? or earning? or contract?)

#1 (title:unemploy\* or "un employment" or "un employed" or "non employed" or "non employment" or jobseeker? or "lay off" or layoff\* or redundan\* or joblessness)

\*\*\*\*\*

## **Google scholar Searches**

### Singular

allintitle:Insecure job unemployment 4  
allintitle:Insecure work unemployment 2  
allintitle:Insecure employment unemployment 2  
allintitle:Insecurity job unemployment 85  
allintitle:Insecurity work unemployment 9  
allintitle:Insecurity employment unemployment 12  
allintitle:bad job unemployment 1  
allintitle:bad work unemployment 4  
allintitle:bad employment unemployment 7  
allintitle:Precarious job unemployment 1  
allintitle:Precarious work unemployment 22  
allintitle:Precarious employment unemployment 28  
allintitle:Insecure job no 2  
allintitle:Insecure work no 2  
allintitle:Insecure employment no  
allintitle:bad job no 1  
allintitle:bad work no 26  
allintitle:bad employment no 4  
allintitle:Precarious job no 0  
allintitle:Precarious work no 11  
allintitle:Precarious employment no 8

### Plural

allintitle:Insecure jobs unemployment 6  
allintitle:Insecure works unemployment 0  
allintitle:Insecure employments unemployment 0  
allintitle:Insecurity jobs unemployment 0  
allintitle:Insecurity works unemployment 0  
allintitle:Insecurity employments unemployment 0  
allintitle:bad jobs unemployment 12  
allintitle:bad works unemployment 0  
allintitle:bad employments unemployment 0  
allintitle:Precarious jobs unemployment 6  
allintitle:Precarious works unemployment 0

allintitle:Precarious employments unemployment 0  
allintitle:Insecure jobs no 0  
allintitle:Insecure works no 0  
allintitle:Insecure employments no 0  
allintitle:bad jobs no 48  
allintitle:bad works no 7  
allintitle:bad employments no 1  
allintitle:Precarious jobs no 0  
allintitle:Precarious works no 0  
allintitle:Precarious employments no 0  
allintitle:work conditions unemployment 26  
allintitle:job conditions unemployment 4  
allintitle:employment conditions unemployment 51  
allintitle:work quality unemployment 33  
allintitle:job quality unemployment 89  
allintitle:employment quality unemployment 38

## **Websites**

What Works well-being (Work) <https://whatworkswellbeing.org/product-category/work/> 2  
ILO International labor organisation <https://www.ilo.org/global/lang--en/index.htm>  
Labordoc (ILO digital repository) [https://labordoc.ilo.org/discovery/search?vid=41ILO\\_INST:41ILO\\_V2&lang=en](https://labordoc.ilo.org/discovery/search?vid=41ILO_INST:41ILO_V2&lang=en)  
Eurofound European Foundation for the Improvement of Living and Working Conditions <https://www.eurofound.europa.eu/publications>  
IES Institute for employment studies <https://www.employment-studies.co.uk/>  
IZA Institute of Labor economics <https://www.iza.org/>  
OECD Employment <https://www.oecd.org/employment/job-quality.htm>  
<https://www.oecd.org/health/mental-health-and-work.htm>  
Work Foundation <http://www.theworkfoundation.com/>  
Joseph Rowntree foundation <https://www.jrf.org.uk/>

## Studies excluded at full text

| Source                                                                                                                                                                                                                                                              | Reason for exclusion                                               |
|---------------------------------------------------------------------------------------------------------------------------------------------------------------------------------------------------------------------------------------------------------------------|--------------------------------------------------------------------|
| Ali SM and Lindstrom, M. (2006) Psychosocial work conditions, unemployment, and leisure-time physical activity: a population-based study. <i>Scand J of Public Health</i> 34 (2):pp.209-16                                                                          | Study sample not drawn from a nationally representative population |
| Ali SM and Lindstrom M (2008) Psychosocial work conditions, unemployment and health locus of control: a population-based study <i>Scand J Public Health</i> 36(4):pp.429-435                                                                                        | Outcome not relevant, does not meet inclusion criteria             |
| Amick BC et al. (2002). Relationship between all-cause mortality and cumulative working life course psychosocial and physical exposures in the United States labor market from 1968 to 1992. <i>Psychosom Med</i> 64(3):pp.370-81                                   | No unemployed comparison                                           |
| Anderson J G (2002). Coping with long-term unemployment: Economic security, labour market integration and well-being: Results from a Danish panel study, 1994-1999. <i>International Journal of Social Welfare</i> . 11(3):pp.178-190                               | No unemployed comparison                                           |
| Arnetz BB et al (1991) Neuroendocrine and immunologic effects of unemployment and job insecurity. <i>Psychother Psychosom</i> 55 (2-4):pp.76-80                                                                                                                     | No relevant between group comparison                               |
| Backhaus M and Zhang W. (2011) Unemployment and mental health who is (not) affected? Evaluation and equity audit of the domestic radon programme in England. <i>Eur J Public Health</i> 22(3):pp.429-433                                                            | No relevant comparison                                             |
| Berth, H et al. (2008) Unemployment, job insecurity and the need for psychosocial support. <i>Arbeitslosigkeitserfahrungen, Arbeitsplatzunsicherheit und der Bedarf an psychosozialer Versorgung</i> . 70(5): pp.289-294                                            | German, unable to translate                                        |
| Berth H et al. (2006) Unemployment, job insecurity and life satisfaction: Results of a study with young adults in the new German states. <i>Sozial-und Praventivmedizin</i> 50(6):361-9                                                                             | German, unable to translate                                        |
| Berth H, Forster P, Brahler E. (2003) Unemployment, job insecurity and their consequences for health in a sample of young adults. <i>Bundesverband der Ärzte des Öffentlichen Gesundheitsdienstes</i> 65(10):pp.555-560                                             | German, unable to translate                                        |
| Blanquet, M. et al. (2017) Occupational status as determinant of mental health inequities in French young people: is fairness needed? Results of a cross-sectional multicentre observational survey. <i>International Journal for Equity in Health</i> 16(1):pp.142 | Study sample not drawn from a nationally representative population |
| Borra C and Garcia FG. Job satisfaction, insecurity and the Great Recession: The effect of others' unemployment. <i>XX Encuentro Economía Pública: Estado ...</i>                                                                                                   | Unable to obtain copy of paper                                     |
| Brenner SO and Starrin B (1998) Unemployment and health in Sweden: Public issues and private trouble. <i>Journal of Social Issues</i> . 44(4):pp.125-140                                                                                                            | No relevant comparison                                             |
| Brockner J et al.(1992) Layoffs, job insecurity, and survivors' work effort: Evidence of an inverted-U relationship. <i>Academy of Management Journal</i> 35(2):pp.413-425                                                                                          | No unemployed comparison group                                     |
| Broom D et al. (2006) The lesser evil: bad jobs or unemployment? A survey of mid-aged Australians. <i>Soc Sci Med</i> 63(3):pp.576-86                                                                                                                               | Study sample not drawn from a nationally representative population |
| Brydsten A, Hammarstrom, A and San Sebastian, M. (2018). Health inequalities between employed and unemployed in northern Sweden: a decomposition analysis of social determinants for mental health. <i>International Journal for Equity in Health</i> 17(7):pp.59   | No relevant comparison                                             |
| Burchell B. (2011) A temporal comparison of the effects of unemployment and job insecurity on wellbeing. <i>Sociological Research Online</i> 16(1):9                                                                                                                | No unemployed comparison                                           |
| Burgard SA, Brand JE. and House JS (2009) Perceived job insecurity and worker health in the United States <i>Soc Sci Med</i> 69(5):777-785                                                                                                                          | No relevant comparison                                             |

| <b>Source</b>                                                                                                                                                                                                                                                      | <b>Reason for exclusion</b>                                                                   |
|--------------------------------------------------------------------------------------------------------------------------------------------------------------------------------------------------------------------------------------------------------------------|-----------------------------------------------------------------------------------------------|
| Campbell-Jamison F, Worrall L and Cooper (2001) Downsizing in Britain and its effects on survivors and their organizations <i>Anxiety, Stress &amp; Coping: An International Journal</i> 14 (1):pp.35-58                                                           | Not a relevant study, no relevant comparison                                                  |
| Canivet C et al. (2016) Precarious employment is a risk factor for poor mental health in young individuals in Sweden: a cohort study with multiple follow-ups. <i>BMC Public Health</i> 16:pp. 687                                                                 | No relevant comparison                                                                        |
| Chambel MJ, Lopes S. and Batista J. (2016) The effects of temporary agency work contract transitions on well-being <i>Int Arch Occup Environ Health</i> 89(9):pp. 1215-1228                                                                                        | Study sample not drawn from a nationally representative population and no relevant comparison |
| Charles KK and Decicca P (2008) Local labor market fluctuations and health: is there a connection and for whom? <i>J Health Econ</i> 27(6):pp.1532-50                                                                                                              | Not a relevant study, no relevant comparison                                                  |
| Clark A, Knabe A and Ratzel S (2010) Boon or bane? Others' unemployment, well-being and job insecurity <i>Labour Economics</i> 17:pp.52-61                                                                                                                         | Did not report any relevant outcomes                                                          |
| Costes FXB, Julia M and Benach J (2016) What is the impact of temporary employment on self-assessed health? A panel study in Catalonia 2002-2012 <i>Occupational and Environmental Medicine</i> 73(Suppl 1)pp.A39                                                  | Conference abstract, does not meet inclusion criteria for source type                         |
| Dalglis SL et al. (2015) Work characteristics and suicidal ideation in young adults in France <i>Soc Psychiatry Psychiatr Epidemiol</i> 50 (4):pp.613-620                                                                                                          | Study sample not drawn from a nationally representative population                            |
| De Witte H (1999) Job insecurity and psychological well-being: Review of the literature and exploration of some unresolved issues <i>European Journal of Work and Organizational Psychology</i> 8(2):155-177                                                       | No relevant comparison                                                                        |
| Dekker SW and Schaufeli WB (1995) The effects of job insecurity on psychological health and withdrawal: A longitudinal study <i>Aust Psychol</i> 30(1): pp.57-63                                                                                                   | No relevant comparison                                                                        |
| Dooley D, Fielding J and Levi L. (1996) Health and unemployment. <i>Annu Rev Public Health</i> 17:pp.449-465                                                                                                                                                       | Not a relevant study                                                                          |
| Dooley D, Prause J (1998) Unemployment and alcohol misuse in the National Longitudinal Survey of Youth. <i>J Stud Alcohol</i> 59(6): pp.669-80                                                                                                                     | No relevant comparison                                                                        |
| Estrella ML et al. (2018) The association of employment status with ideal cardiovascular health factors and behaviors among Hispanic/Latino adults: Findings from the Hispanic Community Health Study/Study of Latinos (HCHS/SOL) <i>PLoS ONE</i> 13(11): e0207652 | Study sample not drawn from a nationally representative population                            |
| Farrants K et al. (2020) Job demands and job control and future labor market situation: An 11-year prospective study of 2.2 million employees. <i>Occup. Environ. Med.</i> 62(6): pp.403-411                                                                       | No relevant comparison or outcomes                                                            |
| Feather NT and O'Brien GE (1986) A longitudinal analysis of the effects of different patterns of employment and unemployment on school-leavers <i>British journal of psychology</i> 77:pp.4/-                                                                      | No relevant comparison                                                                        |
| Ferrie, JE (1997) Labour market status, insecurity and health. <i>J Health Psychol</i> 2(3):pp.373-397                                                                                                                                                             | Not a relevant study                                                                          |
| Ferrie JE et al. (2001) Employment status and health after privatisation in white collar civil servants: Prospective cohort study <i>BMJ</i> 322(7287):pp.647-651                                                                                                  | Study sample not drawn from a nationally representative population                            |
| Ferrie JE et al. (2001) Job insecurity in white-collar workers: toward an explanation of associations with health <i>J Occup Health Psychol</i> 6(1):pp.26-42                                                                                                      | Not a relevant study, no relevant comparison                                                  |
| Ferrie JE et al. (2003) Future uncertainty and socioeconomic inequalities in health: the Whitehall II study <i>Soc Sci Med</i> 57(4):pp.637-46                                                                                                                     | Not a relevant study, no relevant comparison                                                  |
| Flovik L, Knardahl S and Christensen JO (2019) Organizational change and employee mental health: A prospective multilevel study                                                                                                                                    | No relevant comparison                                                                        |

| Source                                                                                                                                                                                                                                           | Reason for exclusion                                               |
|--------------------------------------------------------------------------------------------------------------------------------------------------------------------------------------------------------------------------------------------------|--------------------------------------------------------------------|
| of the associations between organizational changes and clinically relevant mental distress <i>Scand J Work Environ Health</i> 45(2):pp.134-145                                                                                                   |                                                                    |
| Friedmann ML and Webb AA (1995) Family health and mental health six years after economic stress and unemployment. <i>Issues in Mental Health Nursing</i> 16(1):pp.51-66                                                                          | Not a relevant study, no relevant comparison                       |
| Ganson KT et al. (2021) Job insecurity and symptoms of anxiety and depression among young US adults during COVID-19. <i>J Adolesc Health</i> 68(1): pp.53-56                                                                                     | No relevant comparison                                             |
| Giudici F and Morselli D (2019) 20 Years in the world of work: A study of (nonstandard) occupational trajectories and health <i>Soc Sci Med</i> 224:pp.138-148                                                                                   | No relevant comparison                                             |
| Graetz B (1993) Health consequences of employment and unemployment: longitudinal evidence for young men and women <i>Soc Sci Med</i> 36(6):pp.715-724                                                                                            | No relevant comparison                                             |
| Gray BJ et al (2019) Employment status and impact on mental wellbeing in the UK working age population: a cross-sectional analysis <i>Lancet</i> 394(Suppl 2):pp.S44                                                                             | Did not meet inclusion criteria for source type                    |
| Hallsten L, Grossi G, Westerlund H (1999) Unemployment, labour market policy and health in Sweden during years of crisis in the 1990's <i>Int Arch Occup Environ Health</i> 72Suppl:pp.S28-30                                                    | Unable to obtain full text copy                                    |
| Hernando-Rodriguez JC et al. (2020) Sickness absence trajectories following labour market participation patterns: a cohort study in Catalonia (Spain), 2012-2014 <i>BMC Public Health</i> 20(1): pp.1306                                         | No unemployed comparator                                           |
| Hibbard, JH and Pope CR (1985) Employment status, employment characteristics, and women's health <i>Women &amp; Health</i> 10(1):pp.59-77                                                                                                        | No relevant comparison                                             |
| Hughes A et al. (2015) Elevated inflammatory biomarkers during unemployment: modification by age and country in the UK <i>J Epidemiol Community Health</i> 69(7):pp. 673-679                                                                     | No relevant comparison                                             |
| Iversen L and Sabroe S (1998) Psychological well-being among unemployed and employed people after a company closedown: a longitudinal study <i>Journal of Social Issues: 44</i> (Winter 88):pp.141-152                                           | No relevant comparison                                             |
| Izdebski ZW, Mazur J (2021) Changes in mental well-being of adult Poles in the early period of the COVID-19 pandemic with reference to their occupational activity and remote work <i>Int J Occup Med Environ Health</i> 34(2): pp.251-262       | Does not meet inclusion criteria for population                    |
| Jamison CS, Wallace M and Jamison PL (2004) Contemporary work characteristics, stress, and ill health <i>Am J Human Biol</i> 16(1):pp.43-56                                                                                                      | No relevant comparison                                             |
| Khlat M et al. (2014) Mortality gradient across the labour market core-periphery structure: a 13-year mortality follow-up study in north-eastern France <i>Int Arch Occup Environ Health</i> 87(7): pp.725-733                                   | Study sample not drawn from a nationally representative population |
| Kivimaki M et al. (2003) Temporary employment and risk of overall and cause-specific mortality <i>Am J Epidemiol</i> 158(7):pp.663-668                                                                                                           | Study sample not drawn from a nationally representative population |
| Kwon K et al (2016) Association between employment status and self-rated health: Korean working conditions survey <i>Ann Occup Environ Med</i> 28(1 43) DOI 10.1186/s40557-016-0126-z                                                            | No relevant comparison                                             |
| LaMontagne AD et al. (2016) Psychosocial job quality, mental health, and subjective wellbeing: a cross-sectional analysis of the baseline wave of the Australian Longitudinal Study on Male Health <i>BMC Public Health</i> 16 (Suppl 3):pp.1049 | No relevant comparison                                             |
| Leach LS et al. (2010) The limitations of employment as a tool for social inclusion <i>BMC Public Health</i> 10(61):pp.621 doi 10.1186/1471-2458-10-621                                                                                          | Study sample not drawn from a nationally representative population |
| Lee ES and Park S (2019) Patterns of change in employment status and their association with self-rated health, perceived daily stress,                                                                                                           | No relevant comparison                                             |

| Source                                                                                                                                                                                                                   | Reason for exclusion                                                                       |
|--------------------------------------------------------------------------------------------------------------------------------------------------------------------------------------------------------------------------|--------------------------------------------------------------------------------------------|
| and sleep among young adults in South Korea <i>Int J Environ Res Public Health</i> 16(4491):doi:10.3390/ijerph16224491                                                                                                   |                                                                                            |
| Levi L et al. (1984) The psychological, social, and biochemical impacts of unemployment in Sweden: Description of a research project <i>Int J Mental Health</i> 13(1-2):pp.18-34                                         | No relevant comparison                                                                     |
| Lindstrom M (2004) Psychosocial work conditions, social capital, and daily smoking: a population based study <i>Tob Control</i> 13(3):pp.289-295                                                                         | Study sample not drawn from a nationally representative population                         |
| Lindstrom M (2005) Psychosocial work conditions, unemployment and self-reported psychological health: a population-based study <i>Occup Med (Oxf)</i> 55(7):pp.568-71                                                    | Study sample not drawn from a nationally representative population                         |
| Lindstrom M, Ali SM and Rosvall M (2012) Socioeconomic status, labour market connection, and self-rated psychological health: the role of social capital and economic stress <i>Scand J Public Health</i> 40(1):pp.51-60 | No relevant comparison, study sample not drawn from a nationally representative population |
| Livanos I and Zangelidis A (2013) Unemployment, labor market flexibility, and absenteeism: A pan-European study <i>Industrial Relations: A Journal of Economy &amp; Society</i> 52(2):pp.492-515                         | No relevant comparison                                                                     |
| Lopez Gomez MA et al. (2017) Employment history indicators and mortality in a nested case-control study from the Spanish WORKing life social security (WORKss) cohort <i>PLoS ONE</i> 16(6):pp.e0178486                  | No relevant comparison                                                                     |
| Lopez MA et al. (2016) Labour market trajectories and mortality <i>Occup Environ Med</i> 73(suppl1)                                                                                                                      | Conference abstract does not meet inclusion criteria for source type                       |
| Makikangas A et al. (2011) A person-centred approach to investigate the development trajectories of job-related affective well-being: A 10-year follow-up study <i>J Occup Org Psychol</i> 84(2):pp.327-346              | No relevant comparison                                                                     |
| Marchand A, Drapeau A and Beaulieu-Prevost D 2011 Employment, non-employment and psychological distress in Canada <i>Am J Epidemiol</i> 11:pp.S155                                                                       | Conference abstract does not meet inclusion criteria for source type                       |
| Marchand A, Drapeau A and Beaulieu-Prevost D (2012) Psychological distress in Canada: the role of employment and reasons of non-employment <i>Int J Soc Psychiatry</i> 58(6):pp.596-604                                  | No relevant comparison                                                                     |
| Mencia PM, Prieto DC (2021) Job status and depressive symptoms in older employees: An empirical analysis with SHARE (survey of health, aging and retirement in Europe) data <i>Eur J Ment Health</i> 15(2): pp.168-177   | No relevant poor job comparison                                                            |
| Montfort SS et al. (2015) A longitudinal examination of re-employment quality on internalizing symptoms and job-search intentions <i>J Occup Health Psychol</i> 20(1):pp.50-61                                           | No relevant comparison                                                                     |
| Morrell S et al. (1994) A cohort study of unemployment as a cause of psychological disturbance in Australian youth <i>Soc Sci Med</i> 38(11):pp.1553-64                                                                  | No relevant comparison                                                                     |
| O'Brien GE and Feather NT (1990) The relative effects of unemployment and quality of employment on the affect, work values and personal control of adolescents <i>J Occup Psychol</i> 63:pp.51-165                       | Study sample not drawn from a nationally representative population                         |
| Otto K and Dalbert C (2013) Are insecure jobs as bad for mental health and occupational commitment as unemployment? Equal threat or downward spiral <i>Horizons of Psychology</i> 22:pp.27-38A et al                     | Study sample not drawn from a nationally representative population                         |
| Page A et al (2013) The role of under-employment and unemployment in recent birth cohort effects in Australian suicide <i>Soc Sci Med</i> 93:pp.155-162                                                                  | No relevant comparison                                                                     |
| Park S et al. (2020) Precarious employment as compared with unemployment reduces the risk of depression in the elderly in Korea. <i>J Occup Environ Med</i> 62(10): ppe559-e566                                          | Does not meet inclusion criteria for population                                            |
| Perreault M et al (2020) Transitional Employment and Psychological Distress: a Longitudinal Study <i>Psychiatr Q</i> 25:pp.25                                                                                            | No relevant comparison                                                                     |

| <b>Source</b>                                                                                                                                                                                                                                   | <b>Reason for exclusion</b>                                                                                      |
|-------------------------------------------------------------------------------------------------------------------------------------------------------------------------------------------------------------------------------------------------|------------------------------------------------------------------------------------------------------------------|
| Raymo JM and Shibata A (2017) Unemployment, non-standard employment, and fertility: Insights from Japans "Lost 20 Years" <i>Demography</i> 54(6):pp.2301-2329                                                                                   | Outcome not relevant, did not meet inclusion criteria                                                            |
| Robert G et al (2014) From the boom to the crisis: changes in employment conditions of immigrants in Spain and their effects on mental health <i>Eur J Public Health</i> 24(3):pp.404-409                                                       | Study sample not drawn from a nationally representative population (Nb. this should have been excluded at title) |
| Rugulies R et al. (2010) Occupational position and its relation to mental distress in a random sample of Danish residents <i>Int Arch of Occup Environ Health</i> 83(6):pp.625-629                                                              | No relevant comparison                                                                                           |
| Rugulies R et al (2010) Job insecurity and the use of antidepressant medication among Danish employees with and without a history of prolonged unemployment: a 3.5-year follow-up study <i>J Epidemiol Community Health</i> 64(1):pp.75-81      | No relevant comparison                                                                                           |
| Russo C, Terraneo M (2020) Mental well-being among workers: A cross national analysis of job insecurity impact on the workforce. <i>Soc Indic Res</i> 152: pp.421-442                                                                           | No unemployed comparator                                                                                         |
| Scheuring S (2020) The effect of fixed-term employment on well-being: Disentangling the micro-mechanisms and the moderating role of social cohesion. <i>Soc Indic Res</i> 152: pp.91-115                                                        | No relevant comparison – comparison is at country level                                                          |
| Stokes G and Cochrane R (1984) A study of the psychological effects of redundancy and unemployment <i>J Occup Psychol</i> 57(4):pp.309-322                                                                                                      | No relevant comparison                                                                                           |
| Strandh M (2000) Different exit routes from unemployment and their impact on mental well-being: The role of the economic situation and the predictability of the life course <i>Work, Employment and Society</i> 14(3):pp.459-479               | No relevant comparison                                                                                           |
| Vanthomme K et al (2017) Site-specific cancer mortality inequalities by employment and occupational groups: a cohort study among Belgian adults, 2001-2011 <i>BMJ Open</i> 7(11):pp.e015216                                                     | No relevant comparison                                                                                           |
| Virtanen P et al (2008) Employment trajectory as determinant of change in health-related lifestyle: the prospective HeSSup study <i>Eur J Public Health</i> 18(5)pp.504-508                                                                     | No relevant comparison                                                                                           |
| Wanberg R (1995) A longitudinal study of the effects of unemployment and quality of reemployment <i>Journal of Vocational Behavior</i> 46(1):pp.40-54                                                                                           | No relevant comparison                                                                                           |
| Wege N, Angerer P and Li J(2017) Effects of Lifetime Unemployment Experience and Job Insecurity on Two-Year Risk of Physician-Diagnosed Incident Depression in the German Working Population <i>Int J Environ Res Public Health</i> 14(8):pp.11 | No relevant comparison                                                                                           |
| Wolinska W et al. (2020) Analysis of the relationship between insomnia and adult chronic diseases with regard to working conditions. <i>Fam Med Prim</i> 22(3): pp.228-234                                                                      | No relevant poor job comparator                                                                                  |

**Table S1. Data extraction and analysis**

**Full results of all included studies**

| Reference/<br>Study design                       | Data source/<br>Population<br>range                                                             | Poor/bad job<br>definition<br>Outcome                                                                                                            | Results from paper                                                                                                                                                                                                                                                                                                                                                                                                                                                                                                                                                                                                                                                                                                                                                                                                                                                                                                                                                                                                                                                                                                                                                                                                                                                                                                                                                                                                                                                                                                                                                                                                                                                                                                                                                                                                                                                                                                                                                                                                                                                                     | Is any job better than no job?<br>Where OR has been calculated by OES exposure is bad/poor job, is unadjusted and data used to calculate may have been derived from percentages in study results tables |                                           |                          |                             |                            |                                           |                      |                |                     |                             |                                                                                                                                                                                     |                     |             |                     |                     |                     |                                                                                                                                                                                                                                                                                                                                                                                                                                                                                                                                         |                |               |                |                |                |                |                |              |     |     |     |     |     |              |              |              |               |             |              |                                                                                                                                           |
|--------------------------------------------------|-------------------------------------------------------------------------------------------------|--------------------------------------------------------------------------------------------------------------------------------------------------|----------------------------------------------------------------------------------------------------------------------------------------------------------------------------------------------------------------------------------------------------------------------------------------------------------------------------------------------------------------------------------------------------------------------------------------------------------------------------------------------------------------------------------------------------------------------------------------------------------------------------------------------------------------------------------------------------------------------------------------------------------------------------------------------------------------------------------------------------------------------------------------------------------------------------------------------------------------------------------------------------------------------------------------------------------------------------------------------------------------------------------------------------------------------------------------------------------------------------------------------------------------------------------------------------------------------------------------------------------------------------------------------------------------------------------------------------------------------------------------------------------------------------------------------------------------------------------------------------------------------------------------------------------------------------------------------------------------------------------------------------------------------------------------------------------------------------------------------------------------------------------------------------------------------------------------------------------------------------------------------------------------------------------------------------------------------------------------|---------------------------------------------------------------------------------------------------------------------------------------------------------------------------------------------------------|-------------------------------------------|--------------------------|-----------------------------|----------------------------|-------------------------------------------|----------------------|----------------|---------------------|-----------------------------|-------------------------------------------------------------------------------------------------------------------------------------------------------------------------------------|---------------------|-------------|---------------------|---------------------|---------------------|-----------------------------------------------------------------------------------------------------------------------------------------------------------------------------------------------------------------------------------------------------------------------------------------------------------------------------------------------------------------------------------------------------------------------------------------------------------------------------------------------------------------------------------------|----------------|---------------|----------------|----------------|----------------|----------------|----------------|--------------|-----|-----|-----|-----|-----|--------------|--------------|--------------|---------------|-------------|--------------|-------------------------------------------------------------------------------------------------------------------------------------------|
| Bentley R et al. 2020<br><br>Cross sectional     | Household Income and Labour Dynamics in Australia (HILDA) 2018<br><br>25 to 64 years            | Insecure employment, included self-employment, casual or labour hire but not fixed term contracts<br><br>Alcohol and tobacco use                 | Odds ratio and 95% confidence intervals. The effect of economic security on tobacco and alcohol consumption (table 4, page 1888)<br><br><table border="1"> <thead> <tr> <th></th> <th>Smoking status (yes/no)</th> <th>Drinking status (yes/no)</th> <th>Risky drinking (yes/no)</th> </tr> </thead> <tbody> <tr> <td>Secure employment</td> <td>Ref</td> <td>Ref</td> <td>Ref</td> </tr> <tr> <td>Insecure employment</td> <td>1.01 (0.88 to 1.14)</td> <td>0.87 (0.77 to 0.98)</td> <td>0.98 (0.89 to 1.08)</td> </tr> <tr> <td>Unemployed</td> <td>1.32 (1.07 to 1.62)</td> <td>0.66 (0.55 to 0.80)</td> <td>0.82 (0.69 to 0.98)</td> </tr> </tbody> </table><br>Model adjusted for separation, long-term health condition, education, age, household structure.                                                                                                                                                                                                                                                                                                                                                                                                                                                                                                                                                                                                                                                                                                                                                                                                                                                                                                                                                                                                                                                                                                                                                                                                                                                                                                                    |                                                                                                                                                                                                         | Smoking status (yes/no)                   | Drinking status (yes/no) | Risky drinking (yes/no)     | Secure employment          | Ref                                       | Ref                  | Ref            | Insecure employment | 1.01 (0.88 to 1.14)         | 0.87 (0.77 to 0.98)                                                                                                                                                                 | 0.98 (0.89 to 1.08) | Unemployed  | 1.32 (1.07 to 1.62) | 0.66 (0.55 to 0.80) | 0.82 (0.69 to 0.98) | No: compared with those in insecure employment those who are unemployed are more likely to report that they smoke however, this difference is not statistically significant.<br><br>No: Compared with those in insecure employment those who are unemployed are less likely to report that they drink but this difference is not statistically significant<br><br>No: Compared with those in insecure employment those who are unemployed are less likely to report risky drinking but this difference is not statistically significant |                |               |                |                |                |                |                |              |     |     |     |     |     |              |              |              |               |             |              |                                                                                                                                           |
|                                                  | Smoking status (yes/no)                                                                         | Drinking status (yes/no)                                                                                                                         | Risky drinking (yes/no)                                                                                                                                                                                                                                                                                                                                                                                                                                                                                                                                                                                                                                                                                                                                                                                                                                                                                                                                                                                                                                                                                                                                                                                                                                                                                                                                                                                                                                                                                                                                                                                                                                                                                                                                                                                                                                                                                                                                                                                                                                                                |                                                                                                                                                                                                         |                                           |                          |                             |                            |                                           |                      |                |                     |                             |                                                                                                                                                                                     |                     |             |                     |                     |                     |                                                                                                                                                                                                                                                                                                                                                                                                                                                                                                                                         |                |               |                |                |                |                |                |              |     |     |     |     |     |              |              |              |               |             |              |                                                                                                                                           |
| Secure employment                                | Ref                                                                                             | Ref                                                                                                                                              | Ref                                                                                                                                                                                                                                                                                                                                                                                                                                                                                                                                                                                                                                                                                                                                                                                                                                                                                                                                                                                                                                                                                                                                                                                                                                                                                                                                                                                                                                                                                                                                                                                                                                                                                                                                                                                                                                                                                                                                                                                                                                                                                    |                                                                                                                                                                                                         |                                           |                          |                             |                            |                                           |                      |                |                     |                             |                                                                                                                                                                                     |                     |             |                     |                     |                     |                                                                                                                                                                                                                                                                                                                                                                                                                                                                                                                                         |                |               |                |                |                |                |                |              |     |     |     |     |     |              |              |              |               |             |              |                                                                                                                                           |
| Insecure employment                              | 1.01 (0.88 to 1.14)                                                                             | 0.87 (0.77 to 0.98)                                                                                                                              | 0.98 (0.89 to 1.08)                                                                                                                                                                                                                                                                                                                                                                                                                                                                                                                                                                                                                                                                                                                                                                                                                                                                                                                                                                                                                                                                                                                                                                                                                                                                                                                                                                                                                                                                                                                                                                                                                                                                                                                                                                                                                                                                                                                                                                                                                                                                    |                                                                                                                                                                                                         |                                           |                          |                             |                            |                                           |                      |                |                     |                             |                                                                                                                                                                                     |                     |             |                     |                     |                     |                                                                                                                                                                                                                                                                                                                                                                                                                                                                                                                                         |                |               |                |                |                |                |                |              |     |     |     |     |     |              |              |              |               |             |              |                                                                                                                                           |
| Unemployed                                       | 1.32 (1.07 to 1.62)                                                                             | 0.66 (0.55 to 0.80)                                                                                                                              | 0.82 (0.69 to 0.98)                                                                                                                                                                                                                                                                                                                                                                                                                                                                                                                                                                                                                                                                                                                                                                                                                                                                                                                                                                                                                                                                                                                                                                                                                                                                                                                                                                                                                                                                                                                                                                                                                                                                                                                                                                                                                                                                                                                                                                                                                                                                    |                                                                                                                                                                                                         |                                           |                          |                             |                            |                                           |                      |                |                     |                             |                                                                                                                                                                                     |                     |             |                     |                     |                     |                                                                                                                                                                                                                                                                                                                                                                                                                                                                                                                                         |                |               |                |                |                |                |                |              |     |     |     |     |     |              |              |              |               |             |              |                                                                                                                                           |
| Butterworth P et al. 2013<br><br>Cross sectional | English Adult Psychiatric Morbidity Survey, 2007<br><br>21 to 54 years                          | Psychosocial job quality; demands, security, esteem from colleagues, clients, customers and managers, job control<br><br>Common mental disorders | Odds ratios and 95% confidence intervals. Relationship between employment circumstances and common mental disorders (table 3, page 810)<br><br><table border="1"> <tbody> <tr> <td>Employed (optimal)</td> <td>0.16 ( 0.10 to 0.26) p&lt;0.001</td> </tr> <tr> <td>One adversity</td> <td>0.28 (0.18 to 0.43) p&lt;0.001</td> </tr> <tr> <td>Two adversities</td> <td>0.58 (0.36 to 0.92) p=0.022</td> </tr> <tr> <td>Poorest quality jobs</td> <td>1.00 reference</td> </tr> <tr> <td>Unemployed</td> <td>0.79 (0.41 to 1.54) p=0.492</td> </tr> </tbody> </table><br>Model adjusted for demographic and socioeconomic measures (age, sex, partner status, debt and housing tenure)                                                                                                                                                                                                                                                                                                                                                                                                                                                                                                                                                                                                                                                                                                                                                                                                                                                                                                                                                                                                                                                                                                                                                                                                                                                                                                                                                                                                   | Employed (optimal)                                                                                                                                                                                      | 0.16 ( 0.10 to 0.26) p<0.001              | One adversity            | 0.28 (0.18 to 0.43) p<0.001 | Two adversities            | 0.58 (0.36 to 0.92) p=0.022               | Poorest quality jobs | 1.00 reference | Unemployed          | 0.79 (0.41 to 1.54) p=0.492 | No: compared to those in the poorest quality jobs those who were unemployed were less likely to report common mental disorders but this difference is not statistically significant |                     |             |                     |                     |                     |                                                                                                                                                                                                                                                                                                                                                                                                                                                                                                                                         |                |               |                |                |                |                |                |              |     |     |     |     |     |              |              |              |               |             |              |                                                                                                                                           |
| Employed (optimal)                               | 0.16 ( 0.10 to 0.26) p<0.001                                                                    |                                                                                                                                                  |                                                                                                                                                                                                                                                                                                                                                                                                                                                                                                                                                                                                                                                                                                                                                                                                                                                                                                                                                                                                                                                                                                                                                                                                                                                                                                                                                                                                                                                                                                                                                                                                                                                                                                                                                                                                                                                                                                                                                                                                                                                                                        |                                                                                                                                                                                                         |                                           |                          |                             |                            |                                           |                      |                |                     |                             |                                                                                                                                                                                     |                     |             |                     |                     |                     |                                                                                                                                                                                                                                                                                                                                                                                                                                                                                                                                         |                |               |                |                |                |                |                |              |     |     |     |     |     |              |              |              |               |             |              |                                                                                                                                           |
| One adversity                                    | 0.28 (0.18 to 0.43) p<0.001                                                                     |                                                                                                                                                  |                                                                                                                                                                                                                                                                                                                                                                                                                                                                                                                                                                                                                                                                                                                                                                                                                                                                                                                                                                                                                                                                                                                                                                                                                                                                                                                                                                                                                                                                                                                                                                                                                                                                                                                                                                                                                                                                                                                                                                                                                                                                                        |                                                                                                                                                                                                         |                                           |                          |                             |                            |                                           |                      |                |                     |                             |                                                                                                                                                                                     |                     |             |                     |                     |                     |                                                                                                                                                                                                                                                                                                                                                                                                                                                                                                                                         |                |               |                |                |                |                |                |              |     |     |     |     |     |              |              |              |               |             |              |                                                                                                                                           |
| Two adversities                                  | 0.58 (0.36 to 0.92) p=0.022                                                                     |                                                                                                                                                  |                                                                                                                                                                                                                                                                                                                                                                                                                                                                                                                                                                                                                                                                                                                                                                                                                                                                                                                                                                                                                                                                                                                                                                                                                                                                                                                                                                                                                                                                                                                                                                                                                                                                                                                                                                                                                                                                                                                                                                                                                                                                                        |                                                                                                                                                                                                         |                                           |                          |                             |                            |                                           |                      |                |                     |                             |                                                                                                                                                                                     |                     |             |                     |                     |                     |                                                                                                                                                                                                                                                                                                                                                                                                                                                                                                                                         |                |               |                |                |                |                |                |              |     |     |     |     |     |              |              |              |               |             |              |                                                                                                                                           |
| Poorest quality jobs                             | 1.00 reference                                                                                  |                                                                                                                                                  |                                                                                                                                                                                                                                                                                                                                                                                                                                                                                                                                                                                                                                                                                                                                                                                                                                                                                                                                                                                                                                                                                                                                                                                                                                                                                                                                                                                                                                                                                                                                                                                                                                                                                                                                                                                                                                                                                                                                                                                                                                                                                        |                                                                                                                                                                                                         |                                           |                          |                             |                            |                                           |                      |                |                     |                             |                                                                                                                                                                                     |                     |             |                     |                     |                     |                                                                                                                                                                                                                                                                                                                                                                                                                                                                                                                                         |                |               |                |                |                |                |                |              |     |     |     |     |     |              |              |              |               |             |              |                                                                                                                                           |
| Unemployed                                       | 0.79 (0.41 to 1.54) p=0.492                                                                     |                                                                                                                                                  |                                                                                                                                                                                                                                                                                                                                                                                                                                                                                                                                                                                                                                                                                                                                                                                                                                                                                                                                                                                                                                                                                                                                                                                                                                                                                                                                                                                                                                                                                                                                                                                                                                                                                                                                                                                                                                                                                                                                                                                                                                                                                        |                                                                                                                                                                                                         |                                           |                          |                             |                            |                                           |                      |                |                     |                             |                                                                                                                                                                                     |                     |             |                     |                     |                     |                                                                                                                                                                                                                                                                                                                                                                                                                                                                                                                                         |                |               |                |                |                |                |                |              |     |     |     |     |     |              |              |              |               |             |              |                                                                                                                                           |
| Butterworth P et al. 2011<br><br>Cohort          | Household, Income and Labour Dynamics in Australia 2001 to 2007<br><br>20 to 55 years at wave 1 | Psychosocial job quality; demand, complexity, control, security, hours and shift work<br><br>Mental health                                       | Coefficients (and SEs) from a series of longitudinal random-intercept regression models assessing the relationship between employment circumstances and mental health (table 3, page 810)<br><br><table border="1"> <thead> <tr> <th>Employment continuum</th> <th>Model A</th> <th>Model B Add covariates</th> <th>Model C Add Neuroticism</th> <th>Model D Add between-person</th> <th>Model E Lagged predictors of change in MH</th> </tr> </thead> <tbody> <tr> <td>Optimal jobs</td> <td>5.95 (0.33)***</td> <td>5.77 (0.33)***</td> <td>5.40 (0.35)***</td> <td>5.04 (0.34)***</td> <td>6.27 (0.79)***</td> </tr> <tr> <td>1 Adversity</td> <td>4.10 (0.32)***</td> <td>4.00 (0.32)***</td> <td>3.84 (0.34)***</td> <td>3.38 (0.33)***</td> <td>4.26 (0.78)***</td> </tr> <tr> <td>2 Adversities</td> <td>2.42 (0.33)***</td> <td>2.32 (0.33)***</td> <td>2.40 (0.35)***</td> <td>1.85 (0.33)***</td> <td>2.89 (0.83)***</td> </tr> <tr> <td>Poorest jobs</td> <td>Ref</td> <td>Ref</td> <td>Ref</td> <td>Ref</td> <td>Ref</td> </tr> <tr> <td>Unemployment</td> <td>-0.07 (0.55)</td> <td>1.36 (0.55)*</td> <td>1.61 (0.58)**</td> <td>1.3 (0.56)*</td> <td>3.09 (1.32)*</td> </tr> </tbody> </table><br>*p<0.05 **p<0.01 ***p<0.001<br><br>Model B covariates included age, sex, partnered status, physical disability, % of post education life in paid employment, educational qualifications, experience of financial hardship and residence in a socially disadvantaged area<br><br>Model C incorporated neuroticism because negative affect may influence reports of job quality and mental health; this measure was only collected on one occasion<br><br>Model D incorporated experience of poorest job quality, unemployment or not in labour force<br><br>Model E looked at the effect of employment conditions on mental health on lagged employed circumstances and covariates - data from 12 months previous was used to predict change in mental health over 12 months - it only included those who did not change employment circumstance between adjacent waves | Employment continuum                                                                                                                                                                                    | Model A                                   | Model B Add covariates   | Model C Add Neuroticism     | Model D Add between-person | Model E Lagged predictors of change in MH | Optimal jobs         | 5.95 (0.33)*** | 5.77 (0.33)***      | 5.40 (0.35)***              | 5.04 (0.34)***                                                                                                                                                                      | 6.27 (0.79)***      | 1 Adversity | 4.10 (0.32)***      | 4.00 (0.32)***      | 3.84 (0.34)***      | 3.38 (0.33)***                                                                                                                                                                                                                                                                                                                                                                                                                                                                                                                          | 4.26 (0.78)*** | 2 Adversities | 2.42 (0.33)*** | 2.32 (0.33)*** | 2.40 (0.35)*** | 1.85 (0.33)*** | 2.89 (0.83)*** | Poorest jobs | Ref | Ref | Ref | Ref | Ref | Unemployment | -0.07 (0.55) | 1.36 (0.55)* | 1.61 (0.58)** | 1.3 (0.56)* | 3.09 (1.32)* | No: Those in the poorest quality jobs showed significantly greater decline in their mental health overtime than those who were unemployed |
| Employment continuum                             | Model A                                                                                         | Model B Add covariates                                                                                                                           | Model C Add Neuroticism                                                                                                                                                                                                                                                                                                                                                                                                                                                                                                                                                                                                                                                                                                                                                                                                                                                                                                                                                                                                                                                                                                                                                                                                                                                                                                                                                                                                                                                                                                                                                                                                                                                                                                                                                                                                                                                                                                                                                                                                                                                                | Model D Add between-person                                                                                                                                                                              | Model E Lagged predictors of change in MH |                          |                             |                            |                                           |                      |                |                     |                             |                                                                                                                                                                                     |                     |             |                     |                     |                     |                                                                                                                                                                                                                                                                                                                                                                                                                                                                                                                                         |                |               |                |                |                |                |                |              |     |     |     |     |     |              |              |              |               |             |              |                                                                                                                                           |
| Optimal jobs                                     | 5.95 (0.33)***                                                                                  | 5.77 (0.33)***                                                                                                                                   | 5.40 (0.35)***                                                                                                                                                                                                                                                                                                                                                                                                                                                                                                                                                                                                                                                                                                                                                                                                                                                                                                                                                                                                                                                                                                                                                                                                                                                                                                                                                                                                                                                                                                                                                                                                                                                                                                                                                                                                                                                                                                                                                                                                                                                                         | 5.04 (0.34)***                                                                                                                                                                                          | 6.27 (0.79)***                            |                          |                             |                            |                                           |                      |                |                     |                             |                                                                                                                                                                                     |                     |             |                     |                     |                     |                                                                                                                                                                                                                                                                                                                                                                                                                                                                                                                                         |                |               |                |                |                |                |                |              |     |     |     |     |     |              |              |              |               |             |              |                                                                                                                                           |
| 1 Adversity                                      | 4.10 (0.32)***                                                                                  | 4.00 (0.32)***                                                                                                                                   | 3.84 (0.34)***                                                                                                                                                                                                                                                                                                                                                                                                                                                                                                                                                                                                                                                                                                                                                                                                                                                                                                                                                                                                                                                                                                                                                                                                                                                                                                                                                                                                                                                                                                                                                                                                                                                                                                                                                                                                                                                                                                                                                                                                                                                                         | 3.38 (0.33)***                                                                                                                                                                                          | 4.26 (0.78)***                            |                          |                             |                            |                                           |                      |                |                     |                             |                                                                                                                                                                                     |                     |             |                     |                     |                     |                                                                                                                                                                                                                                                                                                                                                                                                                                                                                                                                         |                |               |                |                |                |                |                |              |     |     |     |     |     |              |              |              |               |             |              |                                                                                                                                           |
| 2 Adversities                                    | 2.42 (0.33)***                                                                                  | 2.32 (0.33)***                                                                                                                                   | 2.40 (0.35)***                                                                                                                                                                                                                                                                                                                                                                                                                                                                                                                                                                                                                                                                                                                                                                                                                                                                                                                                                                                                                                                                                                                                                                                                                                                                                                                                                                                                                                                                                                                                                                                                                                                                                                                                                                                                                                                                                                                                                                                                                                                                         | 1.85 (0.33)***                                                                                                                                                                                          | 2.89 (0.83)***                            |                          |                             |                            |                                           |                      |                |                     |                             |                                                                                                                                                                                     |                     |             |                     |                     |                     |                                                                                                                                                                                                                                                                                                                                                                                                                                                                                                                                         |                |               |                |                |                |                |                |              |     |     |     |     |     |              |              |              |               |             |              |                                                                                                                                           |
| Poorest jobs                                     | Ref                                                                                             | Ref                                                                                                                                              | Ref                                                                                                                                                                                                                                                                                                                                                                                                                                                                                                                                                                                                                                                                                                                                                                                                                                                                                                                                                                                                                                                                                                                                                                                                                                                                                                                                                                                                                                                                                                                                                                                                                                                                                                                                                                                                                                                                                                                                                                                                                                                                                    | Ref                                                                                                                                                                                                     | Ref                                       |                          |                             |                            |                                           |                      |                |                     |                             |                                                                                                                                                                                     |                     |             |                     |                     |                     |                                                                                                                                                                                                                                                                                                                                                                                                                                                                                                                                         |                |               |                |                |                |                |                |              |     |     |     |     |     |              |              |              |               |             |              |                                                                                                                                           |
| Unemployment                                     | -0.07 (0.55)                                                                                    | 1.36 (0.55)*                                                                                                                                     | 1.61 (0.58)**                                                                                                                                                                                                                                                                                                                                                                                                                                                                                                                                                                                                                                                                                                                                                                                                                                                                                                                                                                                                                                                                                                                                                                                                                                                                                                                                                                                                                                                                                                                                                                                                                                                                                                                                                                                                                                                                                                                                                                                                                                                                          | 1.3 (0.56)*                                                                                                                                                                                             | 3.09 (1.32)*                              |                          |                             |                            |                                           |                      |                |                     |                             |                                                                                                                                                                                     |                     |             |                     |                     |                     |                                                                                                                                                                                                                                                                                                                                                                                                                                                                                                                                         |                |               |                |                |                |                |                |              |     |     |     |     |     |              |              |              |               |             |              |                                                                                                                                           |



| Reference/<br>Study design                         | Data source/<br>Population<br>range                                                        | Poor/bad job<br>definition<br>Outcome                                                                                                                        | Results from paper                                                                                                                                                                                                                                                                                                                                                                                                                                                                                                                                                                                                                                                                                                                                                                                                                                                                                                                                                                                                                                                                                                                                                                                                                                                                                                                                                                                                                                                                                                                                                                                                                                                                                                                                                                                                                                                                     | Is any job better than no job?<br>Where OR has been calculated by OES exposure is bad/poor job, is unadjusted and data used to calculate may have been derived from percentages in study results tables |                           |                     |                               |                            |                           |                         |   |                 |                          |                           |                        |                   |                          |                          |                         |                     |                     |                 |                      |                     |                          |                        |                         |       |                       |                  |                           |                                                                                                                                                                                                                                                                                                                                                                                                                                                                                                                                                                                                                                                                                                                                                                                                                                                                                                                             |                           |                         |                             |                                      |    |    |                     |                     |                     |                     |                     |                     |                     |                 |                     |                     |                     |                     |                     |                                                                                                                                                                                                                                                                                                                                                                                                                                                                                                                                                                                                                                                                                                                                                                                                                                                                                                                                                                                                                                                                                                                                                                                                                                                  |                |                       |                          |                               |             |     |                                 |            |     |                  |                       |                          |                               |             |     |                               |            |    |
|----------------------------------------------------|--------------------------------------------------------------------------------------------|--------------------------------------------------------------------------------------------------------------------------------------------------------------|----------------------------------------------------------------------------------------------------------------------------------------------------------------------------------------------------------------------------------------------------------------------------------------------------------------------------------------------------------------------------------------------------------------------------------------------------------------------------------------------------------------------------------------------------------------------------------------------------------------------------------------------------------------------------------------------------------------------------------------------------------------------------------------------------------------------------------------------------------------------------------------------------------------------------------------------------------------------------------------------------------------------------------------------------------------------------------------------------------------------------------------------------------------------------------------------------------------------------------------------------------------------------------------------------------------------------------------------------------------------------------------------------------------------------------------------------------------------------------------------------------------------------------------------------------------------------------------------------------------------------------------------------------------------------------------------------------------------------------------------------------------------------------------------------------------------------------------------------------------------------------------|---------------------------------------------------------------------------------------------------------------------------------------------------------------------------------------------------------|---------------------------|---------------------|-------------------------------|----------------------------|---------------------------|-------------------------|---|-----------------|--------------------------|---------------------------|------------------------|-------------------|--------------------------|--------------------------|-------------------------|---------------------|---------------------|-----------------|----------------------|---------------------|--------------------------|------------------------|-------------------------|-------|-----------------------|------------------|---------------------------|-----------------------------------------------------------------------------------------------------------------------------------------------------------------------------------------------------------------------------------------------------------------------------------------------------------------------------------------------------------------------------------------------------------------------------------------------------------------------------------------------------------------------------------------------------------------------------------------------------------------------------------------------------------------------------------------------------------------------------------------------------------------------------------------------------------------------------------------------------------------------------------------------------------------------------|---------------------------|-------------------------|-----------------------------|--------------------------------------|----|----|---------------------|---------------------|---------------------|---------------------|---------------------|---------------------|---------------------|-----------------|---------------------|---------------------|---------------------|---------------------|---------------------|--------------------------------------------------------------------------------------------------------------------------------------------------------------------------------------------------------------------------------------------------------------------------------------------------------------------------------------------------------------------------------------------------------------------------------------------------------------------------------------------------------------------------------------------------------------------------------------------------------------------------------------------------------------------------------------------------------------------------------------------------------------------------------------------------------------------------------------------------------------------------------------------------------------------------------------------------------------------------------------------------------------------------------------------------------------------------------------------------------------------------------------------------------------------------------------------------------------------------------------------------|----------------|-----------------------|--------------------------|-------------------------------|-------------|-----|---------------------------------|------------|-----|------------------|-----------------------|--------------------------|-------------------------------|-------------|-----|-------------------------------|------------|----|
| Chandola and Zhang 2018<br><br>Cohort              | Understanding Society, UK Household Longitudinal Survey 2009 to 2012<br><br>35 to 75 years | Job quality; earnings, security, quality of working environment<br><br>Allostatic load – biomarkers related to chronic stress. Physical and mental wellbeing | Associations between job adversity, allostatic load and self-reported health, multiple regression coefficients at wave 3. Reference remained unemployed $\beta$ coefficients and 95% confidence interval (table 3, page 54)<br><br><table border="1"> <thead> <tr> <th></th> <th>Good quality job</th> <th>One adverse measure</th> <th>At least two adverse measures</th> </tr> </thead> <tbody> <tr> <td>Overall p-value</td> <td></td> <td></td> <td></td> </tr> <tr> <td>Allostatic load</td> <td>-0.387 (-1.003 to 0.230)</td> <td>-0.262 (-0.476 to -0.047)</td> <td>0.512 (0.320 to 0.706)</td> </tr> <tr> <td>SF-12 PCS</td> <td>-0.701 (-4.611 to 3.209)</td> <td>-0.490 (-1.671 to 0.691)</td> <td>1.914 (-3.599 to 7.426)</td> </tr> <tr> <td>0.784</td> <td></td> <td></td> <td></td> </tr> <tr> <td>SF-12 MCS</td> <td>5.541 (-2.841 to 13.923)</td> <td>3.103 (0.966 to 5.240)</td> <td>2.299 (-2.406 to 7.005)</td> </tr> <tr> <td>0.035</td> <td></td> <td></td> <td></td> </tr> </tbody> </table><br>Adjusted for age, gender, highest qualification, housing tenure, marital status, BMI has CVD/diabetes or not SF 12 PHS and MHS composite scores, GHQ-12, number medicines prescribed, log transformation of household income, race/ethnicity, number of children in household, number of people in household and year of latest employment                                                                                                                                                                                                                                                                                                                                                                                                                                                                                                                       |                                                                                                                                                                                                         | Good quality job          | One adverse measure | At least two adverse measures | Overall p-value            |                           |                         |   | Allostatic load | -0.387 (-1.003 to 0.230) | -0.262 (-0.476 to -0.047) | 0.512 (0.320 to 0.706) | SF-12 PCS         | -0.701 (-4.611 to 3.209) | -0.490 (-1.671 to 0.691) | 1.914 (-3.599 to 7.426) | 0.784               |                     |                 |                      | SF-12 MCS           | 5.541 (-2.841 to 13.923) | 3.103 (0.966 to 5.240) | 2.299 (-2.406 to 7.005) | 0.035 |                       |                  |                           | No: those who transitioned into a poor quality job had overall significantly higher levels of allostatic load than those who remained unemployed.<br><br>No: there was no difference in mental component score between those who transitioned into poor quality work and those who remained unemployed.<br><br>No: those who transitioned into a poor quality jobs (at least two adverse measures) were more likely to have a GHQ 12 score indicating distress than those who remained unemployed but this difference is not statistically significant<br><br><table border="1"> <thead> <tr> <th></th> <th>GHQ 12 score distressed</th> <th>GHQ 12 score not-distressed</th> </tr> </thead> <tbody> <tr> <td>Job with at least 2 adverse measures</td> <td>47</td> <td>79</td> </tr> <tr> <td>Remained unemployed</td> <td>19</td> <td>45</td> </tr> </tbody> </table><br>Relative risk 1.25 95% CI 0.80 to 1.96, p=0.3089 |                           | GHQ 12 score distressed | GHQ 12 score not-distressed | Job with at least 2 adverse measures | 47 | 79 | Remained unemployed | 19                  | 45                  |                     |                     |                     |                     |                 |                     |                     |                     |                     |                     |                                                                                                                                                                                                                                                                                                                                                                                                                                                                                                                                                                                                                                                                                                                                                                                                                                                                                                                                                                                                                                                                                                                                                                                                                                                  |                |                       |                          |                               |             |     |                                 |            |     |                  |                       |                          |                               |             |     |                               |            |    |
|                                                    | Good quality job                                                                           | One adverse measure                                                                                                                                          | At least two adverse measures                                                                                                                                                                                                                                                                                                                                                                                                                                                                                                                                                                                                                                                                                                                                                                                                                                                                                                                                                                                                                                                                                                                                                                                                                                                                                                                                                                                                                                                                                                                                                                                                                                                                                                                                                                                                                                                          |                                                                                                                                                                                                         |                           |                     |                               |                            |                           |                         |   |                 |                          |                           |                        |                   |                          |                          |                         |                     |                     |                 |                      |                     |                          |                        |                         |       |                       |                  |                           |                                                                                                                                                                                                                                                                                                                                                                                                                                                                                                                                                                                                                                                                                                                                                                                                                                                                                                                             |                           |                         |                             |                                      |    |    |                     |                     |                     |                     |                     |                     |                     |                 |                     |                     |                     |                     |                     |                                                                                                                                                                                                                                                                                                                                                                                                                                                                                                                                                                                                                                                                                                                                                                                                                                                                                                                                                                                                                                                                                                                                                                                                                                                  |                |                       |                          |                               |             |     |                                 |            |     |                  |                       |                          |                               |             |     |                               |            |    |
| Overall p-value                                    |                                                                                            |                                                                                                                                                              |                                                                                                                                                                                                                                                                                                                                                                                                                                                                                                                                                                                                                                                                                                                                                                                                                                                                                                                                                                                                                                                                                                                                                                                                                                                                                                                                                                                                                                                                                                                                                                                                                                                                                                                                                                                                                                                                                        |                                                                                                                                                                                                         |                           |                     |                               |                            |                           |                         |   |                 |                          |                           |                        |                   |                          |                          |                         |                     |                     |                 |                      |                     |                          |                        |                         |       |                       |                  |                           |                                                                                                                                                                                                                                                                                                                                                                                                                                                                                                                                                                                                                                                                                                                                                                                                                                                                                                                             |                           |                         |                             |                                      |    |    |                     |                     |                     |                     |                     |                     |                     |                 |                     |                     |                     |                     |                     |                                                                                                                                                                                                                                                                                                                                                                                                                                                                                                                                                                                                                                                                                                                                                                                                                                                                                                                                                                                                                                                                                                                                                                                                                                                  |                |                       |                          |                               |             |     |                                 |            |     |                  |                       |                          |                               |             |     |                               |            |    |
| Allostatic load                                    | -0.387 (-1.003 to 0.230)                                                                   | -0.262 (-0.476 to -0.047)                                                                                                                                    | 0.512 (0.320 to 0.706)                                                                                                                                                                                                                                                                                                                                                                                                                                                                                                                                                                                                                                                                                                                                                                                                                                                                                                                                                                                                                                                                                                                                                                                                                                                                                                                                                                                                                                                                                                                                                                                                                                                                                                                                                                                                                                                                 |                                                                                                                                                                                                         |                           |                     |                               |                            |                           |                         |   |                 |                          |                           |                        |                   |                          |                          |                         |                     |                     |                 |                      |                     |                          |                        |                         |       |                       |                  |                           |                                                                                                                                                                                                                                                                                                                                                                                                                                                                                                                                                                                                                                                                                                                                                                                                                                                                                                                             |                           |                         |                             |                                      |    |    |                     |                     |                     |                     |                     |                     |                     |                 |                     |                     |                     |                     |                     |                                                                                                                                                                                                                                                                                                                                                                                                                                                                                                                                                                                                                                                                                                                                                                                                                                                                                                                                                                                                                                                                                                                                                                                                                                                  |                |                       |                          |                               |             |     |                                 |            |     |                  |                       |                          |                               |             |     |                               |            |    |
| SF-12 PCS                                          | -0.701 (-4.611 to 3.209)                                                                   | -0.490 (-1.671 to 0.691)                                                                                                                                     | 1.914 (-3.599 to 7.426)                                                                                                                                                                                                                                                                                                                                                                                                                                                                                                                                                                                                                                                                                                                                                                                                                                                                                                                                                                                                                                                                                                                                                                                                                                                                                                                                                                                                                                                                                                                                                                                                                                                                                                                                                                                                                                                                |                                                                                                                                                                                                         |                           |                     |                               |                            |                           |                         |   |                 |                          |                           |                        |                   |                          |                          |                         |                     |                     |                 |                      |                     |                          |                        |                         |       |                       |                  |                           |                                                                                                                                                                                                                                                                                                                                                                                                                                                                                                                                                                                                                                                                                                                                                                                                                                                                                                                             |                           |                         |                             |                                      |    |    |                     |                     |                     |                     |                     |                     |                     |                 |                     |                     |                     |                     |                     |                                                                                                                                                                                                                                                                                                                                                                                                                                                                                                                                                                                                                                                                                                                                                                                                                                                                                                                                                                                                                                                                                                                                                                                                                                                  |                |                       |                          |                               |             |     |                                 |            |     |                  |                       |                          |                               |             |     |                               |            |    |
| 0.784                                              |                                                                                            |                                                                                                                                                              |                                                                                                                                                                                                                                                                                                                                                                                                                                                                                                                                                                                                                                                                                                                                                                                                                                                                                                                                                                                                                                                                                                                                                                                                                                                                                                                                                                                                                                                                                                                                                                                                                                                                                                                                                                                                                                                                                        |                                                                                                                                                                                                         |                           |                     |                               |                            |                           |                         |   |                 |                          |                           |                        |                   |                          |                          |                         |                     |                     |                 |                      |                     |                          |                        |                         |       |                       |                  |                           |                                                                                                                                                                                                                                                                                                                                                                                                                                                                                                                                                                                                                                                                                                                                                                                                                                                                                                                             |                           |                         |                             |                                      |    |    |                     |                     |                     |                     |                     |                     |                     |                 |                     |                     |                     |                     |                     |                                                                                                                                                                                                                                                                                                                                                                                                                                                                                                                                                                                                                                                                                                                                                                                                                                                                                                                                                                                                                                                                                                                                                                                                                                                  |                |                       |                          |                               |             |     |                                 |            |     |                  |                       |                          |                               |             |     |                               |            |    |
| SF-12 MCS                                          | 5.541 (-2.841 to 13.923)                                                                   | 3.103 (0.966 to 5.240)                                                                                                                                       | 2.299 (-2.406 to 7.005)                                                                                                                                                                                                                                                                                                                                                                                                                                                                                                                                                                                                                                                                                                                                                                                                                                                                                                                                                                                                                                                                                                                                                                                                                                                                                                                                                                                                                                                                                                                                                                                                                                                                                                                                                                                                                                                                |                                                                                                                                                                                                         |                           |                     |                               |                            |                           |                         |   |                 |                          |                           |                        |                   |                          |                          |                         |                     |                     |                 |                      |                     |                          |                        |                         |       |                       |                  |                           |                                                                                                                                                                                                                                                                                                                                                                                                                                                                                                                                                                                                                                                                                                                                                                                                                                                                                                                             |                           |                         |                             |                                      |    |    |                     |                     |                     |                     |                     |                     |                     |                 |                     |                     |                     |                     |                     |                                                                                                                                                                                                                                                                                                                                                                                                                                                                                                                                                                                                                                                                                                                                                                                                                                                                                                                                                                                                                                                                                                                                                                                                                                                  |                |                       |                          |                               |             |     |                                 |            |     |                  |                       |                          |                               |             |     |                               |            |    |
| 0.035                                              |                                                                                            |                                                                                                                                                              |                                                                                                                                                                                                                                                                                                                                                                                                                                                                                                                                                                                                                                                                                                                                                                                                                                                                                                                                                                                                                                                                                                                                                                                                                                                                                                                                                                                                                                                                                                                                                                                                                                                                                                                                                                                                                                                                                        |                                                                                                                                                                                                         |                           |                     |                               |                            |                           |                         |   |                 |                          |                           |                        |                   |                          |                          |                         |                     |                     |                 |                      |                     |                          |                        |                         |       |                       |                  |                           |                                                                                                                                                                                                                                                                                                                                                                                                                                                                                                                                                                                                                                                                                                                                                                                                                                                                                                                             |                           |                         |                             |                                      |    |    |                     |                     |                     |                     |                     |                     |                     |                 |                     |                     |                     |                     |                     |                                                                                                                                                                                                                                                                                                                                                                                                                                                                                                                                                                                                                                                                                                                                                                                                                                                                                                                                                                                                                                                                                                                                                                                                                                                  |                |                       |                          |                               |             |     |                                 |            |     |                  |                       |                          |                               |             |     |                               |            |    |
|                                                    | GHQ 12 score distressed                                                                    | GHQ 12 score not-distressed                                                                                                                                  |                                                                                                                                                                                                                                                                                                                                                                                                                                                                                                                                                                                                                                                                                                                                                                                                                                                                                                                                                                                                                                                                                                                                                                                                                                                                                                                                                                                                                                                                                                                                                                                                                                                                                                                                                                                                                                                                                        |                                                                                                                                                                                                         |                           |                     |                               |                            |                           |                         |   |                 |                          |                           |                        |                   |                          |                          |                         |                     |                     |                 |                      |                     |                          |                        |                         |       |                       |                  |                           |                                                                                                                                                                                                                                                                                                                                                                                                                                                                                                                                                                                                                                                                                                                                                                                                                                                                                                                             |                           |                         |                             |                                      |    |    |                     |                     |                     |                     |                     |                     |                     |                 |                     |                     |                     |                     |                     |                                                                                                                                                                                                                                                                                                                                                                                                                                                                                                                                                                                                                                                                                                                                                                                                                                                                                                                                                                                                                                                                                                                                                                                                                                                  |                |                       |                          |                               |             |     |                                 |            |     |                  |                       |                          |                               |             |     |                               |            |    |
| Job with at least 2 adverse measures               | 47                                                                                         | 79                                                                                                                                                           |                                                                                                                                                                                                                                                                                                                                                                                                                                                                                                                                                                                                                                                                                                                                                                                                                                                                                                                                                                                                                                                                                                                                                                                                                                                                                                                                                                                                                                                                                                                                                                                                                                                                                                                                                                                                                                                                                        |                                                                                                                                                                                                         |                           |                     |                               |                            |                           |                         |   |                 |                          |                           |                        |                   |                          |                          |                         |                     |                     |                 |                      |                     |                          |                        |                         |       |                       |                  |                           |                                                                                                                                                                                                                                                                                                                                                                                                                                                                                                                                                                                                                                                                                                                                                                                                                                                                                                                             |                           |                         |                             |                                      |    |    |                     |                     |                     |                     |                     |                     |                     |                 |                     |                     |                     |                     |                     |                                                                                                                                                                                                                                                                                                                                                                                                                                                                                                                                                                                                                                                                                                                                                                                                                                                                                                                                                                                                                                                                                                                                                                                                                                                  |                |                       |                          |                               |             |     |                                 |            |     |                  |                       |                          |                               |             |     |                               |            |    |
| Remained unemployed                                | 19                                                                                         | 45                                                                                                                                                           |                                                                                                                                                                                                                                                                                                                                                                                                                                                                                                                                                                                                                                                                                                                                                                                                                                                                                                                                                                                                                                                                                                                                                                                                                                                                                                                                                                                                                                                                                                                                                                                                                                                                                                                                                                                                                                                                                        |                                                                                                                                                                                                         |                           |                     |                               |                            |                           |                         |   |                 |                          |                           |                        |                   |                          |                          |                         |                     |                     |                 |                      |                     |                          |                        |                         |       |                       |                  |                           |                                                                                                                                                                                                                                                                                                                                                                                                                                                                                                                                                                                                                                                                                                                                                                                                                                                                                                                             |                           |                         |                             |                                      |    |    |                     |                     |                     |                     |                     |                     |                     |                 |                     |                     |                     |                     |                     |                                                                                                                                                                                                                                                                                                                                                                                                                                                                                                                                                                                                                                                                                                                                                                                                                                                                                                                                                                                                                                                                                                                                                                                                                                                  |                |                       |                          |                               |             |     |                                 |            |     |                  |                       |                          |                               |             |     |                               |            |    |
| Cortes-Franch T et al. 2019<br><br>Cross sectional | European Social Survey 2010<br><br>16 to 64 years                                          | Low quality job; earnings, prospects, intrinsic job quality, working time quality, participation and representation<br><br>Mental wellbeing                  | Odds ratios and 95% confidence intervals for the association of employment situation with poor mental wellbeing by sex and country group. UK and Ireland are liberal countries. Unemployed non-active is those who would like a job but are not actively looking for one. (table 4, page 8)<br><br>Men <table border="1"> <thead> <tr> <th></th> <th>Conservative (n=3543)</th> <th>Liberal (n=1343)</th> <th>Eastern European (n=1690)</th> <th>Southern European (n=1354)</th> <th>Social-Democratic (n=394)</th> </tr> </thead> <tbody> <tr> <td>Unemployed - non-active</td> <td>1</td> <td>1</td> <td>1</td> <td>1</td> <td>1</td> </tr> <tr> <td>Unemployed-active</td> <td>0.60 (0.32 to 1.15)</td> <td>0.51 (0.23 to 1.12)</td> <td>1.07 (0.57 to 2.01)</td> <td>1.57 (0.75 to 3.25)</td> <td>0.82 (0.13 to 5.22)</td> </tr> <tr> <td>Low quality job</td> <td>0.46 (0.25 to 0.83)*</td> <td>0.53 (0.26 to 1.10)</td> <td>0.73 (0.41 to 1.29)</td> <td>0.68 (0.33 to 1.43)</td> <td>1.26 (0.24 to 6.59)</td> </tr> </tbody> </table><br>Women <table border="1"> <thead> <tr> <th></th> <th>Conservative (n=3543)</th> <th>Liberal (n=1343)</th> <th>Eastern European (n=1690)</th> <th>Southern European (n=1354)</th> <th>Social-Democratic (n=394)</th> </tr> </thead> <tbody> <tr> <td>Unemployed - non-active</td> <td>1</td> <td>1</td> <td>1</td> <td>1</td> <td>1</td> </tr> <tr> <td>Unemployed - active</td> <td>1.43 (0.74 to 2.75)</td> <td>1.58 (0.59 to 4.27)</td> <td>0.97 (0.49 to 1.92)</td> <td>0.85 (0.42 to 1.72)</td> <td>0.79 (0.07 to 9.69)</td> </tr> <tr> <td>Low quality job</td> <td>1.18 (0.66 to 2.13)</td> <td>0.79 (0.32 to 1.92)</td> <td>0.60 (0.33 to 1.09)</td> <td>0.80 (0.42 to 1.54)</td> <td>0.64 (0.06 to 6.59)</td> </tr> </tbody> </table><br>*p<0.05<br><br>Adjusted for age, marital status, job category and negative affectivity |                                                                                                                                                                                                         | Conservative (n=3543)     | Liberal (n=1343)    | Eastern European (n=1690)     | Southern European (n=1354) | Social-Democratic (n=394) | Unemployed - non-active | 1 | 1               | 1                        | 1                         | 1                      | Unemployed-active | 0.60 (0.32 to 1.15)      | 0.51 (0.23 to 1.12)      | 1.07 (0.57 to 2.01)     | 1.57 (0.75 to 3.25) | 0.82 (0.13 to 5.22) | Low quality job | 0.46 (0.25 to 0.83)* | 0.53 (0.26 to 1.10) | 0.73 (0.41 to 1.29)      | 0.68 (0.33 to 1.43)    | 1.26 (0.24 to 6.59)     |       | Conservative (n=3543) | Liberal (n=1343) | Eastern European (n=1690) | Southern European (n=1354)                                                                                                                                                                                                                                                                                                                                                                                                                                                                                                                                                                                                                                                                                                                                                                                                                                                                                                  | Social-Democratic (n=394) | Unemployed - non-active | 1                           | 1                                    | 1  | 1  | 1                   | Unemployed - active | 1.43 (0.74 to 2.75) | 1.58 (0.59 to 4.27) | 0.97 (0.49 to 1.92) | 0.85 (0.42 to 1.72) | 0.79 (0.07 to 9.69) | Low quality job | 1.18 (0.66 to 2.13) | 0.79 (0.32 to 1.92) | 0.60 (0.33 to 1.09) | 0.80 (0.42 to 1.54) | 0.64 (0.06 to 6.59) | <b>For liberal countries (UK and Ireland)</b><br>No: Men in low quality jobs were slightly more likely to report poor mental wellbeing than men who were unemployed but the difference is not statistically significant<br><br>Yes: Women who were unemployed were significantly more likely to report poor mental wellbeing than those in low quality jobs<br><br>Odds ratio calculated using data from table 3, page 7 and table 4 page 8.<br><br><table border="1"> <thead> <tr> <th>Males (n=1343)</th> <th>Poor mental wellbeing</th> <th>No poor mental wellbeing</th> </tr> </thead> <tbody> <tr> <td>Low quality job (33.3% n=447)</td> <td>(23.6%) 105</td> <td>342</td> </tr> <tr> <td>Unemployed active (10.7% n=143)</td> <td>(21.5%) 31</td> <td>112</td> </tr> </tbody> </table><br>Odds ratio 1.11, 95% CI 0.70 to 1.75 p=0.6544<br><br><table border="1"> <thead> <tr> <th>Females (n=1198)</th> <th>Poor mental wellbeing</th> <th>No poor mental wellbeing</th> </tr> </thead> <tbody> <tr> <td>Low quality job (31.6% n=379)</td> <td>(34.7%) 132</td> <td>247</td> </tr> <tr> <td>Unemployed active (6.3% n=75)</td> <td>(53.8%) 40</td> <td>35</td> </tr> </tbody> </table><br>Odds ratio 0.47 95% CI 0.28 to 0.77 p=0.0029 | Males (n=1343) | Poor mental wellbeing | No poor mental wellbeing | Low quality job (33.3% n=447) | (23.6%) 105 | 342 | Unemployed active (10.7% n=143) | (21.5%) 31 | 112 | Females (n=1198) | Poor mental wellbeing | No poor mental wellbeing | Low quality job (31.6% n=379) | (34.7%) 132 | 247 | Unemployed active (6.3% n=75) | (53.8%) 40 | 35 |
|                                                    | Conservative (n=3543)                                                                      | Liberal (n=1343)                                                                                                                                             | Eastern European (n=1690)                                                                                                                                                                                                                                                                                                                                                                                                                                                                                                                                                                                                                                                                                                                                                                                                                                                                                                                                                                                                                                                                                                                                                                                                                                                                                                                                                                                                                                                                                                                                                                                                                                                                                                                                                                                                                                                              | Southern European (n=1354)                                                                                                                                                                              | Social-Democratic (n=394) |                     |                               |                            |                           |                         |   |                 |                          |                           |                        |                   |                          |                          |                         |                     |                     |                 |                      |                     |                          |                        |                         |       |                       |                  |                           |                                                                                                                                                                                                                                                                                                                                                                                                                                                                                                                                                                                                                                                                                                                                                                                                                                                                                                                             |                           |                         |                             |                                      |    |    |                     |                     |                     |                     |                     |                     |                     |                 |                     |                     |                     |                     |                     |                                                                                                                                                                                                                                                                                                                                                                                                                                                                                                                                                                                                                                                                                                                                                                                                                                                                                                                                                                                                                                                                                                                                                                                                                                                  |                |                       |                          |                               |             |     |                                 |            |     |                  |                       |                          |                               |             |     |                               |            |    |
| Unemployed - non-active                            | 1                                                                                          | 1                                                                                                                                                            | 1                                                                                                                                                                                                                                                                                                                                                                                                                                                                                                                                                                                                                                                                                                                                                                                                                                                                                                                                                                                                                                                                                                                                                                                                                                                                                                                                                                                                                                                                                                                                                                                                                                                                                                                                                                                                                                                                                      | 1                                                                                                                                                                                                       | 1                         |                     |                               |                            |                           |                         |   |                 |                          |                           |                        |                   |                          |                          |                         |                     |                     |                 |                      |                     |                          |                        |                         |       |                       |                  |                           |                                                                                                                                                                                                                                                                                                                                                                                                                                                                                                                                                                                                                                                                                                                                                                                                                                                                                                                             |                           |                         |                             |                                      |    |    |                     |                     |                     |                     |                     |                     |                     |                 |                     |                     |                     |                     |                     |                                                                                                                                                                                                                                                                                                                                                                                                                                                                                                                                                                                                                                                                                                                                                                                                                                                                                                                                                                                                                                                                                                                                                                                                                                                  |                |                       |                          |                               |             |     |                                 |            |     |                  |                       |                          |                               |             |     |                               |            |    |
| Unemployed-active                                  | 0.60 (0.32 to 1.15)                                                                        | 0.51 (0.23 to 1.12)                                                                                                                                          | 1.07 (0.57 to 2.01)                                                                                                                                                                                                                                                                                                                                                                                                                                                                                                                                                                                                                                                                                                                                                                                                                                                                                                                                                                                                                                                                                                                                                                                                                                                                                                                                                                                                                                                                                                                                                                                                                                                                                                                                                                                                                                                                    | 1.57 (0.75 to 3.25)                                                                                                                                                                                     | 0.82 (0.13 to 5.22)       |                     |                               |                            |                           |                         |   |                 |                          |                           |                        |                   |                          |                          |                         |                     |                     |                 |                      |                     |                          |                        |                         |       |                       |                  |                           |                                                                                                                                                                                                                                                                                                                                                                                                                                                                                                                                                                                                                                                                                                                                                                                                                                                                                                                             |                           |                         |                             |                                      |    |    |                     |                     |                     |                     |                     |                     |                     |                 |                     |                     |                     |                     |                     |                                                                                                                                                                                                                                                                                                                                                                                                                                                                                                                                                                                                                                                                                                                                                                                                                                                                                                                                                                                                                                                                                                                                                                                                                                                  |                |                       |                          |                               |             |     |                                 |            |     |                  |                       |                          |                               |             |     |                               |            |    |
| Low quality job                                    | 0.46 (0.25 to 0.83)*                                                                       | 0.53 (0.26 to 1.10)                                                                                                                                          | 0.73 (0.41 to 1.29)                                                                                                                                                                                                                                                                                                                                                                                                                                                                                                                                                                                                                                                                                                                                                                                                                                                                                                                                                                                                                                                                                                                                                                                                                                                                                                                                                                                                                                                                                                                                                                                                                                                                                                                                                                                                                                                                    | 0.68 (0.33 to 1.43)                                                                                                                                                                                     | 1.26 (0.24 to 6.59)       |                     |                               |                            |                           |                         |   |                 |                          |                           |                        |                   |                          |                          |                         |                     |                     |                 |                      |                     |                          |                        |                         |       |                       |                  |                           |                                                                                                                                                                                                                                                                                                                                                                                                                                                                                                                                                                                                                                                                                                                                                                                                                                                                                                                             |                           |                         |                             |                                      |    |    |                     |                     |                     |                     |                     |                     |                     |                 |                     |                     |                     |                     |                     |                                                                                                                                                                                                                                                                                                                                                                                                                                                                                                                                                                                                                                                                                                                                                                                                                                                                                                                                                                                                                                                                                                                                                                                                                                                  |                |                       |                          |                               |             |     |                                 |            |     |                  |                       |                          |                               |             |     |                               |            |    |
|                                                    | Conservative (n=3543)                                                                      | Liberal (n=1343)                                                                                                                                             | Eastern European (n=1690)                                                                                                                                                                                                                                                                                                                                                                                                                                                                                                                                                                                                                                                                                                                                                                                                                                                                                                                                                                                                                                                                                                                                                                                                                                                                                                                                                                                                                                                                                                                                                                                                                                                                                                                                                                                                                                                              | Southern European (n=1354)                                                                                                                                                                              | Social-Democratic (n=394) |                     |                               |                            |                           |                         |   |                 |                          |                           |                        |                   |                          |                          |                         |                     |                     |                 |                      |                     |                          |                        |                         |       |                       |                  |                           |                                                                                                                                                                                                                                                                                                                                                                                                                                                                                                                                                                                                                                                                                                                                                                                                                                                                                                                             |                           |                         |                             |                                      |    |    |                     |                     |                     |                     |                     |                     |                     |                 |                     |                     |                     |                     |                     |                                                                                                                                                                                                                                                                                                                                                                                                                                                                                                                                                                                                                                                                                                                                                                                                                                                                                                                                                                                                                                                                                                                                                                                                                                                  |                |                       |                          |                               |             |     |                                 |            |     |                  |                       |                          |                               |             |     |                               |            |    |
| Unemployed - non-active                            | 1                                                                                          | 1                                                                                                                                                            | 1                                                                                                                                                                                                                                                                                                                                                                                                                                                                                                                                                                                                                                                                                                                                                                                                                                                                                                                                                                                                                                                                                                                                                                                                                                                                                                                                                                                                                                                                                                                                                                                                                                                                                                                                                                                                                                                                                      | 1                                                                                                                                                                                                       | 1                         |                     |                               |                            |                           |                         |   |                 |                          |                           |                        |                   |                          |                          |                         |                     |                     |                 |                      |                     |                          |                        |                         |       |                       |                  |                           |                                                                                                                                                                                                                                                                                                                                                                                                                                                                                                                                                                                                                                                                                                                                                                                                                                                                                                                             |                           |                         |                             |                                      |    |    |                     |                     |                     |                     |                     |                     |                     |                 |                     |                     |                     |                     |                     |                                                                                                                                                                                                                                                                                                                                                                                                                                                                                                                                                                                                                                                                                                                                                                                                                                                                                                                                                                                                                                                                                                                                                                                                                                                  |                |                       |                          |                               |             |     |                                 |            |     |                  |                       |                          |                               |             |     |                               |            |    |
| Unemployed - active                                | 1.43 (0.74 to 2.75)                                                                        | 1.58 (0.59 to 4.27)                                                                                                                                          | 0.97 (0.49 to 1.92)                                                                                                                                                                                                                                                                                                                                                                                                                                                                                                                                                                                                                                                                                                                                                                                                                                                                                                                                                                                                                                                                                                                                                                                                                                                                                                                                                                                                                                                                                                                                                                                                                                                                                                                                                                                                                                                                    | 0.85 (0.42 to 1.72)                                                                                                                                                                                     | 0.79 (0.07 to 9.69)       |                     |                               |                            |                           |                         |   |                 |                          |                           |                        |                   |                          |                          |                         |                     |                     |                 |                      |                     |                          |                        |                         |       |                       |                  |                           |                                                                                                                                                                                                                                                                                                                                                                                                                                                                                                                                                                                                                                                                                                                                                                                                                                                                                                                             |                           |                         |                             |                                      |    |    |                     |                     |                     |                     |                     |                     |                     |                 |                     |                     |                     |                     |                     |                                                                                                                                                                                                                                                                                                                                                                                                                                                                                                                                                                                                                                                                                                                                                                                                                                                                                                                                                                                                                                                                                                                                                                                                                                                  |                |                       |                          |                               |             |     |                                 |            |     |                  |                       |                          |                               |             |     |                               |            |    |
| Low quality job                                    | 1.18 (0.66 to 2.13)                                                                        | 0.79 (0.32 to 1.92)                                                                                                                                          | 0.60 (0.33 to 1.09)                                                                                                                                                                                                                                                                                                                                                                                                                                                                                                                                                                                                                                                                                                                                                                                                                                                                                                                                                                                                                                                                                                                                                                                                                                                                                                                                                                                                                                                                                                                                                                                                                                                                                                                                                                                                                                                                    | 0.80 (0.42 to 1.54)                                                                                                                                                                                     | 0.64 (0.06 to 6.59)       |                     |                               |                            |                           |                         |   |                 |                          |                           |                        |                   |                          |                          |                         |                     |                     |                 |                      |                     |                          |                        |                         |       |                       |                  |                           |                                                                                                                                                                                                                                                                                                                                                                                                                                                                                                                                                                                                                                                                                                                                                                                                                                                                                                                             |                           |                         |                             |                                      |    |    |                     |                     |                     |                     |                     |                     |                     |                 |                     |                     |                     |                     |                     |                                                                                                                                                                                                                                                                                                                                                                                                                                                                                                                                                                                                                                                                                                                                                                                                                                                                                                                                                                                                                                                                                                                                                                                                                                                  |                |                       |                          |                               |             |     |                                 |            |     |                  |                       |                          |                               |             |     |                               |            |    |
| Males (n=1343)                                     | Poor mental wellbeing                                                                      | No poor mental wellbeing                                                                                                                                     |                                                                                                                                                                                                                                                                                                                                                                                                                                                                                                                                                                                                                                                                                                                                                                                                                                                                                                                                                                                                                                                                                                                                                                                                                                                                                                                                                                                                                                                                                                                                                                                                                                                                                                                                                                                                                                                                                        |                                                                                                                                                                                                         |                           |                     |                               |                            |                           |                         |   |                 |                          |                           |                        |                   |                          |                          |                         |                     |                     |                 |                      |                     |                          |                        |                         |       |                       |                  |                           |                                                                                                                                                                                                                                                                                                                                                                                                                                                                                                                                                                                                                                                                                                                                                                                                                                                                                                                             |                           |                         |                             |                                      |    |    |                     |                     |                     |                     |                     |                     |                     |                 |                     |                     |                     |                     |                     |                                                                                                                                                                                                                                                                                                                                                                                                                                                                                                                                                                                                                                                                                                                                                                                                                                                                                                                                                                                                                                                                                                                                                                                                                                                  |                |                       |                          |                               |             |     |                                 |            |     |                  |                       |                          |                               |             |     |                               |            |    |
| Low quality job (33.3% n=447)                      | (23.6%) 105                                                                                | 342                                                                                                                                                          |                                                                                                                                                                                                                                                                                                                                                                                                                                                                                                                                                                                                                                                                                                                                                                                                                                                                                                                                                                                                                                                                                                                                                                                                                                                                                                                                                                                                                                                                                                                                                                                                                                                                                                                                                                                                                                                                                        |                                                                                                                                                                                                         |                           |                     |                               |                            |                           |                         |   |                 |                          |                           |                        |                   |                          |                          |                         |                     |                     |                 |                      |                     |                          |                        |                         |       |                       |                  |                           |                                                                                                                                                                                                                                                                                                                                                                                                                                                                                                                                                                                                                                                                                                                                                                                                                                                                                                                             |                           |                         |                             |                                      |    |    |                     |                     |                     |                     |                     |                     |                     |                 |                     |                     |                     |                     |                     |                                                                                                                                                                                                                                                                                                                                                                                                                                                                                                                                                                                                                                                                                                                                                                                                                                                                                                                                                                                                                                                                                                                                                                                                                                                  |                |                       |                          |                               |             |     |                                 |            |     |                  |                       |                          |                               |             |     |                               |            |    |
| Unemployed active (10.7% n=143)                    | (21.5%) 31                                                                                 | 112                                                                                                                                                          |                                                                                                                                                                                                                                                                                                                                                                                                                                                                                                                                                                                                                                                                                                                                                                                                                                                                                                                                                                                                                                                                                                                                                                                                                                                                                                                                                                                                                                                                                                                                                                                                                                                                                                                                                                                                                                                                                        |                                                                                                                                                                                                         |                           |                     |                               |                            |                           |                         |   |                 |                          |                           |                        |                   |                          |                          |                         |                     |                     |                 |                      |                     |                          |                        |                         |       |                       |                  |                           |                                                                                                                                                                                                                                                                                                                                                                                                                                                                                                                                                                                                                                                                                                                                                                                                                                                                                                                             |                           |                         |                             |                                      |    |    |                     |                     |                     |                     |                     |                     |                     |                 |                     |                     |                     |                     |                     |                                                                                                                                                                                                                                                                                                                                                                                                                                                                                                                                                                                                                                                                                                                                                                                                                                                                                                                                                                                                                                                                                                                                                                                                                                                  |                |                       |                          |                               |             |     |                                 |            |     |                  |                       |                          |                               |             |     |                               |            |    |
| Females (n=1198)                                   | Poor mental wellbeing                                                                      | No poor mental wellbeing                                                                                                                                     |                                                                                                                                                                                                                                                                                                                                                                                                                                                                                                                                                                                                                                                                                                                                                                                                                                                                                                                                                                                                                                                                                                                                                                                                                                                                                                                                                                                                                                                                                                                                                                                                                                                                                                                                                                                                                                                                                        |                                                                                                                                                                                                         |                           |                     |                               |                            |                           |                         |   |                 |                          |                           |                        |                   |                          |                          |                         |                     |                     |                 |                      |                     |                          |                        |                         |       |                       |                  |                           |                                                                                                                                                                                                                                                                                                                                                                                                                                                                                                                                                                                                                                                                                                                                                                                                                                                                                                                             |                           |                         |                             |                                      |    |    |                     |                     |                     |                     |                     |                     |                     |                 |                     |                     |                     |                     |                     |                                                                                                                                                                                                                                                                                                                                                                                                                                                                                                                                                                                                                                                                                                                                                                                                                                                                                                                                                                                                                                                                                                                                                                                                                                                  |                |                       |                          |                               |             |     |                                 |            |     |                  |                       |                          |                               |             |     |                               |            |    |
| Low quality job (31.6% n=379)                      | (34.7%) 132                                                                                | 247                                                                                                                                                          |                                                                                                                                                                                                                                                                                                                                                                                                                                                                                                                                                                                                                                                                                                                                                                                                                                                                                                                                                                                                                                                                                                                                                                                                                                                                                                                                                                                                                                                                                                                                                                                                                                                                                                                                                                                                                                                                                        |                                                                                                                                                                                                         |                           |                     |                               |                            |                           |                         |   |                 |                          |                           |                        |                   |                          |                          |                         |                     |                     |                 |                      |                     |                          |                        |                         |       |                       |                  |                           |                                                                                                                                                                                                                                                                                                                                                                                                                                                                                                                                                                                                                                                                                                                                                                                                                                                                                                                             |                           |                         |                             |                                      |    |    |                     |                     |                     |                     |                     |                     |                     |                 |                     |                     |                     |                     |                     |                                                                                                                                                                                                                                                                                                                                                                                                                                                                                                                                                                                                                                                                                                                                                                                                                                                                                                                                                                                                                                                                                                                                                                                                                                                  |                |                       |                          |                               |             |     |                                 |            |     |                  |                       |                          |                               |             |     |                               |            |    |
| Unemployed active (6.3% n=75)                      | (53.8%) 40                                                                                 | 35                                                                                                                                                           |                                                                                                                                                                                                                                                                                                                                                                                                                                                                                                                                                                                                                                                                                                                                                                                                                                                                                                                                                                                                                                                                                                                                                                                                                                                                                                                                                                                                                                                                                                                                                                                                                                                                                                                                                                                                                                                                                        |                                                                                                                                                                                                         |                           |                     |                               |                            |                           |                         |   |                 |                          |                           |                        |                   |                          |                          |                         |                     |                     |                 |                      |                     |                          |                        |                         |       |                       |                  |                           |                                                                                                                                                                                                                                                                                                                                                                                                                                                                                                                                                                                                                                                                                                                                                                                                                                                                                                                             |                           |                         |                             |                                      |    |    |                     |                     |                     |                     |                     |                     |                     |                 |                     |                     |                     |                     |                     |                                                                                                                                                                                                                                                                                                                                                                                                                                                                                                                                                                                                                                                                                                                                                                                                                                                                                                                                                                                                                                                                                                                                                                                                                                                  |                |                       |                          |                               |             |     |                                 |            |     |                  |                       |                          |                               |             |     |                               |            |    |

| Reference/<br>Study design                                 | Data source/<br>Population<br>range                                                                | Poor/bad job<br>definition<br>Outcome                              | Results from paper                                                                                                                                                                                                                                                                                                                                                                                                                                                                                                                                                                                                                                                                                                                                                                                                                                                                                                                                                                                                                                                                                                                                                                                                                                                                                                                                                                                                                                                                                                                                                                                                                                                                                                                                                                                                                                                                                                                                                                                                                                                                                                                                                                                                                                                                                                                                                                                                                                                                                                                                            | Is any job better than no job?<br>Where OR has been calculated by OES exposure is bad/poor job, is unadjusted and data used to calculate may have been derived from percentages in study results tables |              |                |                         |                      |     |                    |                       |                       |             |                      |                       |                             |                        |                        |                        |                         |                       |                                                                                                                                                                                                                                                                                                                                                                                                                                                                                                                                                                                                                                                                                                                                                                                                                                           |     |                        |          |         |    |                                                            |     |       |  |                      |     |     |  |             |  |  |  |                       |  |  |  |             |         |        |  |                |         |          |  |                   |         |        |  |                        |          |          |     |                        |          |          |  |  |     |       |                      |     |     |                       |          |          |                   |          |          |                        |          |          |                          |          |         |                                                                                                                                                                                                                                                            |
|------------------------------------------------------------|----------------------------------------------------------------------------------------------------|--------------------------------------------------------------------|---------------------------------------------------------------------------------------------------------------------------------------------------------------------------------------------------------------------------------------------------------------------------------------------------------------------------------------------------------------------------------------------------------------------------------------------------------------------------------------------------------------------------------------------------------------------------------------------------------------------------------------------------------------------------------------------------------------------------------------------------------------------------------------------------------------------------------------------------------------------------------------------------------------------------------------------------------------------------------------------------------------------------------------------------------------------------------------------------------------------------------------------------------------------------------------------------------------------------------------------------------------------------------------------------------------------------------------------------------------------------------------------------------------------------------------------------------------------------------------------------------------------------------------------------------------------------------------------------------------------------------------------------------------------------------------------------------------------------------------------------------------------------------------------------------------------------------------------------------------------------------------------------------------------------------------------------------------------------------------------------------------------------------------------------------------------------------------------------------------------------------------------------------------------------------------------------------------------------------------------------------------------------------------------------------------------------------------------------------------------------------------------------------------------------------------------------------------------------------------------------------------------------------------------------------------|---------------------------------------------------------------------------------------------------------------------------------------------------------------------------------------------------------|--------------|----------------|-------------------------|----------------------|-----|--------------------|-----------------------|-----------------------|-------------|----------------------|-----------------------|-----------------------------|------------------------|------------------------|------------------------|-------------------------|-----------------------|-------------------------------------------------------------------------------------------------------------------------------------------------------------------------------------------------------------------------------------------------------------------------------------------------------------------------------------------------------------------------------------------------------------------------------------------------------------------------------------------------------------------------------------------------------------------------------------------------------------------------------------------------------------------------------------------------------------------------------------------------------------------------------------------------------------------------------------------|-----|------------------------|----------|---------|----|------------------------------------------------------------|-----|-------|--|----------------------|-----|-----|--|-------------|--|--|--|-----------------------|--|--|--|-------------|---------|--------|--|----------------|---------|----------|--|-------------------|---------|--------|--|------------------------|----------|----------|-----|------------------------|----------|----------|--|--|-----|-------|----------------------|-----|-----|-----------------------|----------|----------|-------------------|----------|----------|------------------------|----------|----------|--------------------------|----------|---------|------------------------------------------------------------------------------------------------------------------------------------------------------------------------------------------------------------------------------------------------------------|
| Cortes-Franch T et al. 2018<br><br>Cross sectional         | Spanish National Health Survey 2006 to 2007<br><br>25 to 64 years                                  | Insecure employment, temporary or no contract<br><br>Mental health | Odds ratios and 95% confidence intervals. Association between mental health status and employment stability by sex. (table 2, page 4)<br><br><table border="0"> <thead> <tr> <th></th> <th>Men (n=6972)</th> <th>Women (n=5307)</th> </tr> </thead> <tbody> <tr> <td>Permanent civil servant</td> <td>1</td> <td>1</td> </tr> <tr> <td>Temporary contract</td> <td>1.63 (1.17 to 2.26)**</td> <td>1.36 (1.0 to 1.85)*</td> </tr> <tr> <td>No contract</td> <td>2.10 (1.13 to 3.90)*</td> <td>1.85 (1.28 to 2.67)**</td> </tr> <tr> <td>Unemployment = or &lt; 2 years</td> <td>3.76 (2.68 to 5.29)***</td> <td>1.98 (1.44 to 2.74)***</td> </tr> <tr> <td>Unemployment &gt; 2 years</td> <td>6.76 (4.08 to 11.19)***</td> <td>1.79 (1.20 to 2.68)**</td> </tr> </tbody> </table> <p>* p&lt;0.05 **p&lt;0.01 ***p&lt;0.001</p> <p>Adjusted for age and social class</p> <p>Note that there are inconsistencies in the number of reported participants across the tables in this paper – all tables give different totals, this is not explained in the text. This may be an error but there is no correction or comment on this in the online journal</p>                                                                                                                                                                                                                                                                                                                                                                                                                                                                                                                                                                                                                                                                                                                                                                                                                                                                                                                                                                                                                                                                                                                                                                                                                                                                                                                                                                                                      |                                                                                                                                                                                                         | Men (n=6972) | Women (n=5307) | Permanent civil servant | 1                    | 1   | Temporary contract | 1.63 (1.17 to 2.26)** | 1.36 (1.0 to 1.85)*   | No contract | 2.10 (1.13 to 3.90)* | 1.85 (1.28 to 2.67)** | Unemployment = or < 2 years | 3.76 (2.68 to 5.29)*** | 1.98 (1.44 to 2.74)*** | Unemployment > 2 years | 6.76 (4.08 to 11.19)*** | 1.79 (1.20 to 2.68)** | Yes: Men who were employed in a temporary contract were less likely to report poor mental health status than those who were unemployed (for any length of time). This is likely to be significant.<br><br>Yes: Men who were employed with no contract were less likely to report poor mental health than those who had been unemployed for two years or less. This is likely to be significant.<br><br>No: Men who were employed with no contract were less likely to report poor mental health than those who had been unemployed for more than two years. This is unlikely to be significant.<br><br>No: Women who were employed with no, or a temporary contract were less likely to report poor mental health than women who had been unemployed for any length of time. This difference is unlikely to be statistically significant. |     |                        |          |         |    |                                                            |     |       |  |                      |     |     |  |             |  |  |  |                       |  |  |  |             |         |        |  |                |         |          |  |                   |         |        |  |                        |          |          |     |                        |          |          |  |  |     |       |                      |     |     |                       |          |          |                   |          |          |                        |          |          |                          |          |         |                                                                                                                                                                                                                                                            |
|                                                            | Men (n=6972)                                                                                       | Women (n=5307)                                                     |                                                                                                                                                                                                                                                                                                                                                                                                                                                                                                                                                                                                                                                                                                                                                                                                                                                                                                                                                                                                                                                                                                                                                                                                                                                                                                                                                                                                                                                                                                                                                                                                                                                                                                                                                                                                                                                                                                                                                                                                                                                                                                                                                                                                                                                                                                                                                                                                                                                                                                                                                               |                                                                                                                                                                                                         |              |                |                         |                      |     |                    |                       |                       |             |                      |                       |                             |                        |                        |                        |                         |                       |                                                                                                                                                                                                                                                                                                                                                                                                                                                                                                                                                                                                                                                                                                                                                                                                                                           |     |                        |          |         |    |                                                            |     |       |  |                      |     |     |  |             |  |  |  |                       |  |  |  |             |         |        |  |                |         |          |  |                   |         |        |  |                        |          |          |     |                        |          |          |  |  |     |       |                      |     |     |                       |          |          |                   |          |          |                        |          |          |                          |          |         |                                                                                                                                                                                                                                                            |
| Permanent civil servant                                    | 1                                                                                                  | 1                                                                  |                                                                                                                                                                                                                                                                                                                                                                                                                                                                                                                                                                                                                                                                                                                                                                                                                                                                                                                                                                                                                                                                                                                                                                                                                                                                                                                                                                                                                                                                                                                                                                                                                                                                                                                                                                                                                                                                                                                                                                                                                                                                                                                                                                                                                                                                                                                                                                                                                                                                                                                                                               |                                                                                                                                                                                                         |              |                |                         |                      |     |                    |                       |                       |             |                      |                       |                             |                        |                        |                        |                         |                       |                                                                                                                                                                                                                                                                                                                                                                                                                                                                                                                                                                                                                                                                                                                                                                                                                                           |     |                        |          |         |    |                                                            |     |       |  |                      |     |     |  |             |  |  |  |                       |  |  |  |             |         |        |  |                |         |          |  |                   |         |        |  |                        |          |          |     |                        |          |          |  |  |     |       |                      |     |     |                       |          |          |                   |          |          |                        |          |          |                          |          |         |                                                                                                                                                                                                                                                            |
| Temporary contract                                         | 1.63 (1.17 to 2.26)**                                                                              | 1.36 (1.0 to 1.85)*                                                |                                                                                                                                                                                                                                                                                                                                                                                                                                                                                                                                                                                                                                                                                                                                                                                                                                                                                                                                                                                                                                                                                                                                                                                                                                                                                                                                                                                                                                                                                                                                                                                                                                                                                                                                                                                                                                                                                                                                                                                                                                                                                                                                                                                                                                                                                                                                                                                                                                                                                                                                                               |                                                                                                                                                                                                         |              |                |                         |                      |     |                    |                       |                       |             |                      |                       |                             |                        |                        |                        |                         |                       |                                                                                                                                                                                                                                                                                                                                                                                                                                                                                                                                                                                                                                                                                                                                                                                                                                           |     |                        |          |         |    |                                                            |     |       |  |                      |     |     |  |             |  |  |  |                       |  |  |  |             |         |        |  |                |         |          |  |                   |         |        |  |                        |          |          |     |                        |          |          |  |  |     |       |                      |     |     |                       |          |          |                   |          |          |                        |          |          |                          |          |         |                                                                                                                                                                                                                                                            |
| No contract                                                | 2.10 (1.13 to 3.90)*                                                                               | 1.85 (1.28 to 2.67)**                                              |                                                                                                                                                                                                                                                                                                                                                                                                                                                                                                                                                                                                                                                                                                                                                                                                                                                                                                                                                                                                                                                                                                                                                                                                                                                                                                                                                                                                                                                                                                                                                                                                                                                                                                                                                                                                                                                                                                                                                                                                                                                                                                                                                                                                                                                                                                                                                                                                                                                                                                                                                               |                                                                                                                                                                                                         |              |                |                         |                      |     |                    |                       |                       |             |                      |                       |                             |                        |                        |                        |                         |                       |                                                                                                                                                                                                                                                                                                                                                                                                                                                                                                                                                                                                                                                                                                                                                                                                                                           |     |                        |          |         |    |                                                            |     |       |  |                      |     |     |  |             |  |  |  |                       |  |  |  |             |         |        |  |                |         |          |  |                   |         |        |  |                        |          |          |     |                        |          |          |  |  |     |       |                      |     |     |                       |          |          |                   |          |          |                        |          |          |                          |          |         |                                                                                                                                                                                                                                                            |
| Unemployment = or < 2 years                                | 3.76 (2.68 to 5.29)***                                                                             | 1.98 (1.44 to 2.74)***                                             |                                                                                                                                                                                                                                                                                                                                                                                                                                                                                                                                                                                                                                                                                                                                                                                                                                                                                                                                                                                                                                                                                                                                                                                                                                                                                                                                                                                                                                                                                                                                                                                                                                                                                                                                                                                                                                                                                                                                                                                                                                                                                                                                                                                                                                                                                                                                                                                                                                                                                                                                                               |                                                                                                                                                                                                         |              |                |                         |                      |     |                    |                       |                       |             |                      |                       |                             |                        |                        |                        |                         |                       |                                                                                                                                                                                                                                                                                                                                                                                                                                                                                                                                                                                                                                                                                                                                                                                                                                           |     |                        |          |         |    |                                                            |     |       |  |                      |     |     |  |             |  |  |  |                       |  |  |  |             |         |        |  |                |         |          |  |                   |         |        |  |                        |          |          |     |                        |          |          |  |  |     |       |                      |     |     |                       |          |          |                   |          |          |                        |          |          |                          |          |         |                                                                                                                                                                                                                                                            |
| Unemployment > 2 years                                     | 6.76 (4.08 to 11.19)***                                                                            | 1.79 (1.20 to 2.68)**                                              |                                                                                                                                                                                                                                                                                                                                                                                                                                                                                                                                                                                                                                                                                                                                                                                                                                                                                                                                                                                                                                                                                                                                                                                                                                                                                                                                                                                                                                                                                                                                                                                                                                                                                                                                                                                                                                                                                                                                                                                                                                                                                                                                                                                                                                                                                                                                                                                                                                                                                                                                                               |                                                                                                                                                                                                         |              |                |                         |                      |     |                    |                       |                       |             |                      |                       |                             |                        |                        |                        |                         |                       |                                                                                                                                                                                                                                                                                                                                                                                                                                                                                                                                                                                                                                                                                                                                                                                                                                           |     |                        |          |         |    |                                                            |     |       |  |                      |     |     |  |             |  |  |  |                       |  |  |  |             |         |        |  |                |         |          |  |                   |         |        |  |                        |          |          |     |                        |          |          |  |  |     |       |                      |     |     |                       |          |          |                   |          |          |                        |          |          |                          |          |         |                                                                                                                                                                                                                                                            |
| Fiori et al. 2016<br><br>Cross sectional                   | Health Conditions and Access to Health Services Survey, Italy, 2005 and 2013<br><br>18 to 39 years | Insecure employment<br><br>Mental health                           | Effects of status in the labour market on mental health score, 2013 unstandardised $\beta$ coefficients (table 1, page 93)<br><br><table border="0"> <thead> <tr> <th>Model 1a status in labour market</th> <th>Men</th> <th>Women</th> <th>Men/women</th> </tr> </thead> <tbody> <tr> <td>Permanent employment</td> <td>ref</td> <td>ref</td> <td></td> </tr> <tr> <td>Fixed term employment</td> <td>1.684**</td> <td>2.547***</td> <td></td> </tr> <tr> <td>Atypical employment</td> <td>2.763*</td> <td>2.614*</td> <td></td> </tr> <tr> <td>In search of new job</td> <td>7.798***</td> <td>4.765***</td> <td>***</td> </tr> <tr> <td>In search of first job</td> <td>5.053***</td> <td>2.392**</td> <td>**</td> </tr> </tbody> </table><br><table border="0"> <thead> <tr> <th>Model 1b status in the labour market + occupational status</th> <th>Men</th> <th>Women</th> <th></th> </tr> </thead> <tbody> <tr> <td>Permanent employment</td> <td>ref</td> <td>ref</td> <td></td> </tr> <tr> <td>medium-high</td> <td></td> <td></td> <td></td> </tr> <tr> <td>Fixed term employment</td> <td></td> <td></td> <td></td> </tr> <tr> <td>medium high</td> <td>2.193**</td> <td>1.833*</td> <td></td> </tr> <tr> <td>Fixed term low</td> <td>2.278**</td> <td>3.747***</td> <td></td> </tr> <tr> <td>Atypical contract</td> <td>3.473**</td> <td>2.806*</td> <td></td> </tr> <tr> <td>In search of a new job</td> <td>8.590***</td> <td>5.047***</td> <td>***</td> </tr> <tr> <td>In search of first job</td> <td>5.830***</td> <td>2.675***</td> <td></td> </tr> </tbody> </table> <p>Models 1a and b adjusted for age, area of residence, living arrangement and educational qualification</p> <p>Effects of status in labour market and survey year on mental health score by gender, pooled data for the years 2005 and 2013 unstandardised <math>\beta</math> coefficients (table 5, page 95)</p> <table border="0"> <thead> <tr> <th></th> <th>Men</th> <th>Women</th> </tr> </thead> <tbody> <tr> <td>Permanent employment</td> <td>ref</td> <td>ref</td> </tr> <tr> <td>Fixed term employment</td> <td>2.197***</td> <td>1.947***</td> </tr> <tr> <td>Atypical contract</td> <td>2.541***</td> <td>2.323***</td> </tr> <tr> <td>In search of a new job</td> <td>7.543***</td> <td>3.960***</td> </tr> <tr> <td>In search of a first job</td> <td>4.535***</td> <td>1.284**</td> </tr> </tbody> </table> <p>Adjusted for age, area of residence, living arrangement and educational qualifications</p> <p>*p&lt;0.05 **p&lt;0.01 ***p&lt;0.001</p> | Model 1a status in labour market                                                                                                                                                                        | Men          | Women          | Men/women               | Permanent employment | ref | ref                |                       | Fixed term employment | 1.684**     | 2.547***             |                       | Atypical employment         | 2.763*                 | 2.614*                 |                        | In search of new job    | 7.798***              | 4.765***                                                                                                                                                                                                                                                                                                                                                                                                                                                                                                                                                                                                                                                                                                                                                                                                                                  | *** | In search of first job | 5.053*** | 2.392** | ** | Model 1b status in the labour market + occupational status | Men | Women |  | Permanent employment | ref | ref |  | medium-high |  |  |  | Fixed term employment |  |  |  | medium high | 2.193** | 1.833* |  | Fixed term low | 2.278** | 3.747*** |  | Atypical contract | 3.473** | 2.806* |  | In search of a new job | 8.590*** | 5.047*** | *** | In search of first job | 5.830*** | 2.675*** |  |  | Men | Women | Permanent employment | ref | ref | Fixed term employment | 2.197*** | 1.947*** | Atypical contract | 2.541*** | 2.323*** | In search of a new job | 7.543*** | 3.960*** | In search of a first job | 4.535*** | 1.284** | Yes: Those in fixed term employment and those with an atypical contract were less likely to report poor mental health than those who were looking for a new job. Is isn't possible to tell if these differences are likely to be statistically significant |
| Model 1a status in labour market                           | Men                                                                                                | Women                                                              | Men/women                                                                                                                                                                                                                                                                                                                                                                                                                                                                                                                                                                                                                                                                                                                                                                                                                                                                                                                                                                                                                                                                                                                                                                                                                                                                                                                                                                                                                                                                                                                                                                                                                                                                                                                                                                                                                                                                                                                                                                                                                                                                                                                                                                                                                                                                                                                                                                                                                                                                                                                                                     |                                                                                                                                                                                                         |              |                |                         |                      |     |                    |                       |                       |             |                      |                       |                             |                        |                        |                        |                         |                       |                                                                                                                                                                                                                                                                                                                                                                                                                                                                                                                                                                                                                                                                                                                                                                                                                                           |     |                        |          |         |    |                                                            |     |       |  |                      |     |     |  |             |  |  |  |                       |  |  |  |             |         |        |  |                |         |          |  |                   |         |        |  |                        |          |          |     |                        |          |          |  |  |     |       |                      |     |     |                       |          |          |                   |          |          |                        |          |          |                          |          |         |                                                                                                                                                                                                                                                            |
| Permanent employment                                       | ref                                                                                                | ref                                                                |                                                                                                                                                                                                                                                                                                                                                                                                                                                                                                                                                                                                                                                                                                                                                                                                                                                                                                                                                                                                                                                                                                                                                                                                                                                                                                                                                                                                                                                                                                                                                                                                                                                                                                                                                                                                                                                                                                                                                                                                                                                                                                                                                                                                                                                                                                                                                                                                                                                                                                                                                               |                                                                                                                                                                                                         |              |                |                         |                      |     |                    |                       |                       |             |                      |                       |                             |                        |                        |                        |                         |                       |                                                                                                                                                                                                                                                                                                                                                                                                                                                                                                                                                                                                                                                                                                                                                                                                                                           |     |                        |          |         |    |                                                            |     |       |  |                      |     |     |  |             |  |  |  |                       |  |  |  |             |         |        |  |                |         |          |  |                   |         |        |  |                        |          |          |     |                        |          |          |  |  |     |       |                      |     |     |                       |          |          |                   |          |          |                        |          |          |                          |          |         |                                                                                                                                                                                                                                                            |
| Fixed term employment                                      | 1.684**                                                                                            | 2.547***                                                           |                                                                                                                                                                                                                                                                                                                                                                                                                                                                                                                                                                                                                                                                                                                                                                                                                                                                                                                                                                                                                                                                                                                                                                                                                                                                                                                                                                                                                                                                                                                                                                                                                                                                                                                                                                                                                                                                                                                                                                                                                                                                                                                                                                                                                                                                                                                                                                                                                                                                                                                                                               |                                                                                                                                                                                                         |              |                |                         |                      |     |                    |                       |                       |             |                      |                       |                             |                        |                        |                        |                         |                       |                                                                                                                                                                                                                                                                                                                                                                                                                                                                                                                                                                                                                                                                                                                                                                                                                                           |     |                        |          |         |    |                                                            |     |       |  |                      |     |     |  |             |  |  |  |                       |  |  |  |             |         |        |  |                |         |          |  |                   |         |        |  |                        |          |          |     |                        |          |          |  |  |     |       |                      |     |     |                       |          |          |                   |          |          |                        |          |          |                          |          |         |                                                                                                                                                                                                                                                            |
| Atypical employment                                        | 2.763*                                                                                             | 2.614*                                                             |                                                                                                                                                                                                                                                                                                                                                                                                                                                                                                                                                                                                                                                                                                                                                                                                                                                                                                                                                                                                                                                                                                                                                                                                                                                                                                                                                                                                                                                                                                                                                                                                                                                                                                                                                                                                                                                                                                                                                                                                                                                                                                                                                                                                                                                                                                                                                                                                                                                                                                                                                               |                                                                                                                                                                                                         |              |                |                         |                      |     |                    |                       |                       |             |                      |                       |                             |                        |                        |                        |                         |                       |                                                                                                                                                                                                                                                                                                                                                                                                                                                                                                                                                                                                                                                                                                                                                                                                                                           |     |                        |          |         |    |                                                            |     |       |  |                      |     |     |  |             |  |  |  |                       |  |  |  |             |         |        |  |                |         |          |  |                   |         |        |  |                        |          |          |     |                        |          |          |  |  |     |       |                      |     |     |                       |          |          |                   |          |          |                        |          |          |                          |          |         |                                                                                                                                                                                                                                                            |
| In search of new job                                       | 7.798***                                                                                           | 4.765***                                                           | ***                                                                                                                                                                                                                                                                                                                                                                                                                                                                                                                                                                                                                                                                                                                                                                                                                                                                                                                                                                                                                                                                                                                                                                                                                                                                                                                                                                                                                                                                                                                                                                                                                                                                                                                                                                                                                                                                                                                                                                                                                                                                                                                                                                                                                                                                                                                                                                                                                                                                                                                                                           |                                                                                                                                                                                                         |              |                |                         |                      |     |                    |                       |                       |             |                      |                       |                             |                        |                        |                        |                         |                       |                                                                                                                                                                                                                                                                                                                                                                                                                                                                                                                                                                                                                                                                                                                                                                                                                                           |     |                        |          |         |    |                                                            |     |       |  |                      |     |     |  |             |  |  |  |                       |  |  |  |             |         |        |  |                |         |          |  |                   |         |        |  |                        |          |          |     |                        |          |          |  |  |     |       |                      |     |     |                       |          |          |                   |          |          |                        |          |          |                          |          |         |                                                                                                                                                                                                                                                            |
| In search of first job                                     | 5.053***                                                                                           | 2.392**                                                            | **                                                                                                                                                                                                                                                                                                                                                                                                                                                                                                                                                                                                                                                                                                                                                                                                                                                                                                                                                                                                                                                                                                                                                                                                                                                                                                                                                                                                                                                                                                                                                                                                                                                                                                                                                                                                                                                                                                                                                                                                                                                                                                                                                                                                                                                                                                                                                                                                                                                                                                                                                            |                                                                                                                                                                                                         |              |                |                         |                      |     |                    |                       |                       |             |                      |                       |                             |                        |                        |                        |                         |                       |                                                                                                                                                                                                                                                                                                                                                                                                                                                                                                                                                                                                                                                                                                                                                                                                                                           |     |                        |          |         |    |                                                            |     |       |  |                      |     |     |  |             |  |  |  |                       |  |  |  |             |         |        |  |                |         |          |  |                   |         |        |  |                        |          |          |     |                        |          |          |  |  |     |       |                      |     |     |                       |          |          |                   |          |          |                        |          |          |                          |          |         |                                                                                                                                                                                                                                                            |
| Model 1b status in the labour market + occupational status | Men                                                                                                | Women                                                              |                                                                                                                                                                                                                                                                                                                                                                                                                                                                                                                                                                                                                                                                                                                                                                                                                                                                                                                                                                                                                                                                                                                                                                                                                                                                                                                                                                                                                                                                                                                                                                                                                                                                                                                                                                                                                                                                                                                                                                                                                                                                                                                                                                                                                                                                                                                                                                                                                                                                                                                                                               |                                                                                                                                                                                                         |              |                |                         |                      |     |                    |                       |                       |             |                      |                       |                             |                        |                        |                        |                         |                       |                                                                                                                                                                                                                                                                                                                                                                                                                                                                                                                                                                                                                                                                                                                                                                                                                                           |     |                        |          |         |    |                                                            |     |       |  |                      |     |     |  |             |  |  |  |                       |  |  |  |             |         |        |  |                |         |          |  |                   |         |        |  |                        |          |          |     |                        |          |          |  |  |     |       |                      |     |     |                       |          |          |                   |          |          |                        |          |          |                          |          |         |                                                                                                                                                                                                                                                            |
| Permanent employment                                       | ref                                                                                                | ref                                                                |                                                                                                                                                                                                                                                                                                                                                                                                                                                                                                                                                                                                                                                                                                                                                                                                                                                                                                                                                                                                                                                                                                                                                                                                                                                                                                                                                                                                                                                                                                                                                                                                                                                                                                                                                                                                                                                                                                                                                                                                                                                                                                                                                                                                                                                                                                                                                                                                                                                                                                                                                               |                                                                                                                                                                                                         |              |                |                         |                      |     |                    |                       |                       |             |                      |                       |                             |                        |                        |                        |                         |                       |                                                                                                                                                                                                                                                                                                                                                                                                                                                                                                                                                                                                                                                                                                                                                                                                                                           |     |                        |          |         |    |                                                            |     |       |  |                      |     |     |  |             |  |  |  |                       |  |  |  |             |         |        |  |                |         |          |  |                   |         |        |  |                        |          |          |     |                        |          |          |  |  |     |       |                      |     |     |                       |          |          |                   |          |          |                        |          |          |                          |          |         |                                                                                                                                                                                                                                                            |
| medium-high                                                |                                                                                                    |                                                                    |                                                                                                                                                                                                                                                                                                                                                                                                                                                                                                                                                                                                                                                                                                                                                                                                                                                                                                                                                                                                                                                                                                                                                                                                                                                                                                                                                                                                                                                                                                                                                                                                                                                                                                                                                                                                                                                                                                                                                                                                                                                                                                                                                                                                                                                                                                                                                                                                                                                                                                                                                               |                                                                                                                                                                                                         |              |                |                         |                      |     |                    |                       |                       |             |                      |                       |                             |                        |                        |                        |                         |                       |                                                                                                                                                                                                                                                                                                                                                                                                                                                                                                                                                                                                                                                                                                                                                                                                                                           |     |                        |          |         |    |                                                            |     |       |  |                      |     |     |  |             |  |  |  |                       |  |  |  |             |         |        |  |                |         |          |  |                   |         |        |  |                        |          |          |     |                        |          |          |  |  |     |       |                      |     |     |                       |          |          |                   |          |          |                        |          |          |                          |          |         |                                                                                                                                                                                                                                                            |
| Fixed term employment                                      |                                                                                                    |                                                                    |                                                                                                                                                                                                                                                                                                                                                                                                                                                                                                                                                                                                                                                                                                                                                                                                                                                                                                                                                                                                                                                                                                                                                                                                                                                                                                                                                                                                                                                                                                                                                                                                                                                                                                                                                                                                                                                                                                                                                                                                                                                                                                                                                                                                                                                                                                                                                                                                                                                                                                                                                               |                                                                                                                                                                                                         |              |                |                         |                      |     |                    |                       |                       |             |                      |                       |                             |                        |                        |                        |                         |                       |                                                                                                                                                                                                                                                                                                                                                                                                                                                                                                                                                                                                                                                                                                                                                                                                                                           |     |                        |          |         |    |                                                            |     |       |  |                      |     |     |  |             |  |  |  |                       |  |  |  |             |         |        |  |                |         |          |  |                   |         |        |  |                        |          |          |     |                        |          |          |  |  |     |       |                      |     |     |                       |          |          |                   |          |          |                        |          |          |                          |          |         |                                                                                                                                                                                                                                                            |
| medium high                                                | 2.193**                                                                                            | 1.833*                                                             |                                                                                                                                                                                                                                                                                                                                                                                                                                                                                                                                                                                                                                                                                                                                                                                                                                                                                                                                                                                                                                                                                                                                                                                                                                                                                                                                                                                                                                                                                                                                                                                                                                                                                                                                                                                                                                                                                                                                                                                                                                                                                                                                                                                                                                                                                                                                                                                                                                                                                                                                                               |                                                                                                                                                                                                         |              |                |                         |                      |     |                    |                       |                       |             |                      |                       |                             |                        |                        |                        |                         |                       |                                                                                                                                                                                                                                                                                                                                                                                                                                                                                                                                                                                                                                                                                                                                                                                                                                           |     |                        |          |         |    |                                                            |     |       |  |                      |     |     |  |             |  |  |  |                       |  |  |  |             |         |        |  |                |         |          |  |                   |         |        |  |                        |          |          |     |                        |          |          |  |  |     |       |                      |     |     |                       |          |          |                   |          |          |                        |          |          |                          |          |         |                                                                                                                                                                                                                                                            |
| Fixed term low                                             | 2.278**                                                                                            | 3.747***                                                           |                                                                                                                                                                                                                                                                                                                                                                                                                                                                                                                                                                                                                                                                                                                                                                                                                                                                                                                                                                                                                                                                                                                                                                                                                                                                                                                                                                                                                                                                                                                                                                                                                                                                                                                                                                                                                                                                                                                                                                                                                                                                                                                                                                                                                                                                                                                                                                                                                                                                                                                                                               |                                                                                                                                                                                                         |              |                |                         |                      |     |                    |                       |                       |             |                      |                       |                             |                        |                        |                        |                         |                       |                                                                                                                                                                                                                                                                                                                                                                                                                                                                                                                                                                                                                                                                                                                                                                                                                                           |     |                        |          |         |    |                                                            |     |       |  |                      |     |     |  |             |  |  |  |                       |  |  |  |             |         |        |  |                |         |          |  |                   |         |        |  |                        |          |          |     |                        |          |          |  |  |     |       |                      |     |     |                       |          |          |                   |          |          |                        |          |          |                          |          |         |                                                                                                                                                                                                                                                            |
| Atypical contract                                          | 3.473**                                                                                            | 2.806*                                                             |                                                                                                                                                                                                                                                                                                                                                                                                                                                                                                                                                                                                                                                                                                                                                                                                                                                                                                                                                                                                                                                                                                                                                                                                                                                                                                                                                                                                                                                                                                                                                                                                                                                                                                                                                                                                                                                                                                                                                                                                                                                                                                                                                                                                                                                                                                                                                                                                                                                                                                                                                               |                                                                                                                                                                                                         |              |                |                         |                      |     |                    |                       |                       |             |                      |                       |                             |                        |                        |                        |                         |                       |                                                                                                                                                                                                                                                                                                                                                                                                                                                                                                                                                                                                                                                                                                                                                                                                                                           |     |                        |          |         |    |                                                            |     |       |  |                      |     |     |  |             |  |  |  |                       |  |  |  |             |         |        |  |                |         |          |  |                   |         |        |  |                        |          |          |     |                        |          |          |  |  |     |       |                      |     |     |                       |          |          |                   |          |          |                        |          |          |                          |          |         |                                                                                                                                                                                                                                                            |
| In search of a new job                                     | 8.590***                                                                                           | 5.047***                                                           | ***                                                                                                                                                                                                                                                                                                                                                                                                                                                                                                                                                                                                                                                                                                                                                                                                                                                                                                                                                                                                                                                                                                                                                                                                                                                                                                                                                                                                                                                                                                                                                                                                                                                                                                                                                                                                                                                                                                                                                                                                                                                                                                                                                                                                                                                                                                                                                                                                                                                                                                                                                           |                                                                                                                                                                                                         |              |                |                         |                      |     |                    |                       |                       |             |                      |                       |                             |                        |                        |                        |                         |                       |                                                                                                                                                                                                                                                                                                                                                                                                                                                                                                                                                                                                                                                                                                                                                                                                                                           |     |                        |          |         |    |                                                            |     |       |  |                      |     |     |  |             |  |  |  |                       |  |  |  |             |         |        |  |                |         |          |  |                   |         |        |  |                        |          |          |     |                        |          |          |  |  |     |       |                      |     |     |                       |          |          |                   |          |          |                        |          |          |                          |          |         |                                                                                                                                                                                                                                                            |
| In search of first job                                     | 5.830***                                                                                           | 2.675***                                                           |                                                                                                                                                                                                                                                                                                                                                                                                                                                                                                                                                                                                                                                                                                                                                                                                                                                                                                                                                                                                                                                                                                                                                                                                                                                                                                                                                                                                                                                                                                                                                                                                                                                                                                                                                                                                                                                                                                                                                                                                                                                                                                                                                                                                                                                                                                                                                                                                                                                                                                                                                               |                                                                                                                                                                                                         |              |                |                         |                      |     |                    |                       |                       |             |                      |                       |                             |                        |                        |                        |                         |                       |                                                                                                                                                                                                                                                                                                                                                                                                                                                                                                                                                                                                                                                                                                                                                                                                                                           |     |                        |          |         |    |                                                            |     |       |  |                      |     |     |  |             |  |  |  |                       |  |  |  |             |         |        |  |                |         |          |  |                   |         |        |  |                        |          |          |     |                        |          |          |  |  |     |       |                      |     |     |                       |          |          |                   |          |          |                        |          |          |                          |          |         |                                                                                                                                                                                                                                                            |
|                                                            | Men                                                                                                | Women                                                              |                                                                                                                                                                                                                                                                                                                                                                                                                                                                                                                                                                                                                                                                                                                                                                                                                                                                                                                                                                                                                                                                                                                                                                                                                                                                                                                                                                                                                                                                                                                                                                                                                                                                                                                                                                                                                                                                                                                                                                                                                                                                                                                                                                                                                                                                                                                                                                                                                                                                                                                                                               |                                                                                                                                                                                                         |              |                |                         |                      |     |                    |                       |                       |             |                      |                       |                             |                        |                        |                        |                         |                       |                                                                                                                                                                                                                                                                                                                                                                                                                                                                                                                                                                                                                                                                                                                                                                                                                                           |     |                        |          |         |    |                                                            |     |       |  |                      |     |     |  |             |  |  |  |                       |  |  |  |             |         |        |  |                |         |          |  |                   |         |        |  |                        |          |          |     |                        |          |          |  |  |     |       |                      |     |     |                       |          |          |                   |          |          |                        |          |          |                          |          |         |                                                                                                                                                                                                                                                            |
| Permanent employment                                       | ref                                                                                                | ref                                                                |                                                                                                                                                                                                                                                                                                                                                                                                                                                                                                                                                                                                                                                                                                                                                                                                                                                                                                                                                                                                                                                                                                                                                                                                                                                                                                                                                                                                                                                                                                                                                                                                                                                                                                                                                                                                                                                                                                                                                                                                                                                                                                                                                                                                                                                                                                                                                                                                                                                                                                                                                               |                                                                                                                                                                                                         |              |                |                         |                      |     |                    |                       |                       |             |                      |                       |                             |                        |                        |                        |                         |                       |                                                                                                                                                                                                                                                                                                                                                                                                                                                                                                                                                                                                                                                                                                                                                                                                                                           |     |                        |          |         |    |                                                            |     |       |  |                      |     |     |  |             |  |  |  |                       |  |  |  |             |         |        |  |                |         |          |  |                   |         |        |  |                        |          |          |     |                        |          |          |  |  |     |       |                      |     |     |                       |          |          |                   |          |          |                        |          |          |                          |          |         |                                                                                                                                                                                                                                                            |
| Fixed term employment                                      | 2.197***                                                                                           | 1.947***                                                           |                                                                                                                                                                                                                                                                                                                                                                                                                                                                                                                                                                                                                                                                                                                                                                                                                                                                                                                                                                                                                                                                                                                                                                                                                                                                                                                                                                                                                                                                                                                                                                                                                                                                                                                                                                                                                                                                                                                                                                                                                                                                                                                                                                                                                                                                                                                                                                                                                                                                                                                                                               |                                                                                                                                                                                                         |              |                |                         |                      |     |                    |                       |                       |             |                      |                       |                             |                        |                        |                        |                         |                       |                                                                                                                                                                                                                                                                                                                                                                                                                                                                                                                                                                                                                                                                                                                                                                                                                                           |     |                        |          |         |    |                                                            |     |       |  |                      |     |     |  |             |  |  |  |                       |  |  |  |             |         |        |  |                |         |          |  |                   |         |        |  |                        |          |          |     |                        |          |          |  |  |     |       |                      |     |     |                       |          |          |                   |          |          |                        |          |          |                          |          |         |                                                                                                                                                                                                                                                            |
| Atypical contract                                          | 2.541***                                                                                           | 2.323***                                                           |                                                                                                                                                                                                                                                                                                                                                                                                                                                                                                                                                                                                                                                                                                                                                                                                                                                                                                                                                                                                                                                                                                                                                                                                                                                                                                                                                                                                                                                                                                                                                                                                                                                                                                                                                                                                                                                                                                                                                                                                                                                                                                                                                                                                                                                                                                                                                                                                                                                                                                                                                               |                                                                                                                                                                                                         |              |                |                         |                      |     |                    |                       |                       |             |                      |                       |                             |                        |                        |                        |                         |                       |                                                                                                                                                                                                                                                                                                                                                                                                                                                                                                                                                                                                                                                                                                                                                                                                                                           |     |                        |          |         |    |                                                            |     |       |  |                      |     |     |  |             |  |  |  |                       |  |  |  |             |         |        |  |                |         |          |  |                   |         |        |  |                        |          |          |     |                        |          |          |  |  |     |       |                      |     |     |                       |          |          |                   |          |          |                        |          |          |                          |          |         |                                                                                                                                                                                                                                                            |
| In search of a new job                                     | 7.543***                                                                                           | 3.960***                                                           |                                                                                                                                                                                                                                                                                                                                                                                                                                                                                                                                                                                                                                                                                                                                                                                                                                                                                                                                                                                                                                                                                                                                                                                                                                                                                                                                                                                                                                                                                                                                                                                                                                                                                                                                                                                                                                                                                                                                                                                                                                                                                                                                                                                                                                                                                                                                                                                                                                                                                                                                                               |                                                                                                                                                                                                         |              |                |                         |                      |     |                    |                       |                       |             |                      |                       |                             |                        |                        |                        |                         |                       |                                                                                                                                                                                                                                                                                                                                                                                                                                                                                                                                                                                                                                                                                                                                                                                                                                           |     |                        |          |         |    |                                                            |     |       |  |                      |     |     |  |             |  |  |  |                       |  |  |  |             |         |        |  |                |         |          |  |                   |         |        |  |                        |          |          |     |                        |          |          |  |  |     |       |                      |     |     |                       |          |          |                   |          |          |                        |          |          |                          |          |         |                                                                                                                                                                                                                                                            |
| In search of a first job                                   | 4.535***                                                                                           | 1.284**                                                            |                                                                                                                                                                                                                                                                                                                                                                                                                                                                                                                                                                                                                                                                                                                                                                                                                                                                                                                                                                                                                                                                                                                                                                                                                                                                                                                                                                                                                                                                                                                                                                                                                                                                                                                                                                                                                                                                                                                                                                                                                                                                                                                                                                                                                                                                                                                                                                                                                                                                                                                                                               |                                                                                                                                                                                                         |              |                |                         |                      |     |                    |                       |                       |             |                      |                       |                             |                        |                        |                        |                         |                       |                                                                                                                                                                                                                                                                                                                                                                                                                                                                                                                                                                                                                                                                                                                                                                                                                                           |     |                        |          |         |    |                                                            |     |       |  |                      |     |     |  |             |  |  |  |                       |  |  |  |             |         |        |  |                |         |          |  |                   |         |        |  |                        |          |          |     |                        |          |          |  |  |     |       |                      |     |     |                       |          |          |                   |          |          |                        |          |          |                          |          |         |                                                                                                                                                                                                                                                            |

| Reference/<br>Study design                | Data source/<br>Population<br>range                                             | Poor/bad job<br>definition<br>Outcome                                                                      | Results from paper                                                                                                                                                                                                                                                                                                                                                                                                                                                                                                                                                                                                                                                                                                                                                                                                                                                                                                                                                                                                                                                                                                                                                                                                                                                                                                                                                                                                                                                                                                                                                                                                                           | Is any job better than no job?<br>Where OR has been calculated by OES exposure is bad/poor<br>job, is unadjusted and data used to calculate may have<br>been derived from percentages in study results tables                                                                                                                   |                           |                                |                               |                              |   |                     |                          |                              |                                |                                |                              |                      |                                |                              |                                |                              |             |                              |                      |       |                                 |                                |                              |                              |                                |                     |          |                                |                                  |                                       |                                       |                                  |                      |             |                                                                                                                                                                                                                                                                                                                                                                                                                                                                                                                                                                                                                                                                                             |  |  |  |  |  |  |                                    |      |      |          |      |      |          |                                   |      |      |           |      |      |           |                                                                                                                                                                                                                                                |
|-------------------------------------------|---------------------------------------------------------------------------------|------------------------------------------------------------------------------------------------------------|----------------------------------------------------------------------------------------------------------------------------------------------------------------------------------------------------------------------------------------------------------------------------------------------------------------------------------------------------------------------------------------------------------------------------------------------------------------------------------------------------------------------------------------------------------------------------------------------------------------------------------------------------------------------------------------------------------------------------------------------------------------------------------------------------------------------------------------------------------------------------------------------------------------------------------------------------------------------------------------------------------------------------------------------------------------------------------------------------------------------------------------------------------------------------------------------------------------------------------------------------------------------------------------------------------------------------------------------------------------------------------------------------------------------------------------------------------------------------------------------------------------------------------------------------------------------------------------------------------------------------------------------|---------------------------------------------------------------------------------------------------------------------------------------------------------------------------------------------------------------------------------------------------------------------------------------------------------------------------------|---------------------------|--------------------------------|-------------------------------|------------------------------|---|---------------------|--------------------------|------------------------------|--------------------------------|--------------------------------|------------------------------|----------------------|--------------------------------|------------------------------|--------------------------------|------------------------------|-------------|------------------------------|----------------------|-------|---------------------------------|--------------------------------|------------------------------|------------------------------|--------------------------------|---------------------|----------|--------------------------------|----------------------------------|---------------------------------------|---------------------------------------|----------------------------------|----------------------|-------------|---------------------------------------------------------------------------------------------------------------------------------------------------------------------------------------------------------------------------------------------------------------------------------------------------------------------------------------------------------------------------------------------------------------------------------------------------------------------------------------------------------------------------------------------------------------------------------------------------------------------------------------------------------------------------------------------|--|--|--|--|--|--|------------------------------------|------|------|----------|------|------|----------|-----------------------------------|------|------|-----------|------|------|-----------|------------------------------------------------------------------------------------------------------------------------------------------------------------------------------------------------------------------------------------------------|
|                                           |                                                                                 |                                                                                                            | Positive estimated $\beta$ coefficients indicate worse mental health compared with respondents in the reference category                                                                                                                                                                                                                                                                                                                                                                                                                                                                                                                                                                                                                                                                                                                                                                                                                                                                                                                                                                                                                                                                                                                                                                                                                                                                                                                                                                                                                                                                                                                     |                                                                                                                                                                                                                                                                                                                                 |                           |                                |                               |                              |   |                     |                          |                              |                                |                                |                              |                      |                                |                              |                                |                              |             |                              |                      |       |                                 |                                |                              |                              |                                |                     |          |                                |                                  |                                       |                                       |                                  |                      |             |                                                                                                                                                                                                                                                                                                                                                                                                                                                                                                                                                                                                                                                                                             |  |  |  |  |  |  |                                    |      |      |          |      |      |          |                                   |      |      |           |      |      |           |                                                                                                                                                                                                                                                |
| Flint et al. 2013<br>Cohort               | British Household<br>Panel Survey<br>1991 to 2007<br><br>16-65 years            | Insecure employment<br><br>Psychological<br>wellbeing                                                      | Association between labour market status categories and GHQ-12 from multivariate fixed effects model beta coefficient and 95% confidence interval (table 2, page 799)<br><br>Securely employed 0<br>Insecurely employed 1.11 (1.00 to 1.21)<br>Unemployed 2.21 (1.99 to 2.43)<br><br>Adjusted for age, educational attainment, physical health problems, spousal joblessness, spousal GHQ-12 caseness, marital status, unemployed spells in the last 12 month, residence in social housing, substance abuse and equivalised household income.                                                                                                                                                                                                                                                                                                                                                                                                                                                                                                                                                                                                                                                                                                                                                                                                                                                                                                                                                                                                                                                                                                | Yes: Compared to when they were securely employed an individual experiencing a spell of insecure employment had a GHQ-12 score elevated by 1.2 units. An unemployed spell was associated with an increase of 2.2 units. Higher scores indicate lower levels of psychological wellbeing. This difference is probably significant |                           |                                |                               |                              |   |                     |                          |                              |                                |                                |                              |                      |                                |                              |                                |                              |             |                              |                      |       |                                 |                                |                              |                              |                                |                     |          |                                |                                  |                                       |                                       |                                  |                      |             |                                                                                                                                                                                                                                                                                                                                                                                                                                                                                                                                                                                                                                                                                             |  |  |  |  |  |  |                                    |      |      |          |      |      |          |                                   |      |      |           |      |      |           |                                                                                                                                                                                                                                                |
| Fornell B et al. 2018<br>Cross sectional  | Survey of Living<br>Conditions,<br>Spain, 2007 to<br>2011<br><br>16 to 65 years | Insecure employment<br><br>General health                                                                  | Odds ratios and 95% confidence intervals association between perceived health, unemployment, and employment precariousness. Does not state but implies reference is permanent employment<br><br>Unemployed 1.7484 (1.5274 to 2.0013) $p < 0.001$<br>Precariousness 1.3755 (1.1902 to 1.5903) $p < 0.001$<br><br>Unclear but analysis appears to be unadjusted                                                                                                                                                                                                                                                                                                                                                                                                                                                                                                                                                                                                                                                                                                                                                                                                                                                                                                                                                                                                                                                                                                                                                                                                                                                                                | No: Those who were unemployed were more likely to report that their health was bad than those in precarious employment. This difference is unlikely to be statistically significant                                                                                                                                             |                           |                                |                               |                              |   |                     |                          |                              |                                |                                |                              |                      |                                |                              |                                |                              |             |                              |                      |       |                                 |                                |                              |                              |                                |                     |          |                                |                                  |                                       |                                       |                                  |                      |             |                                                                                                                                                                                                                                                                                                                                                                                                                                                                                                                                                                                                                                                                                             |  |  |  |  |  |  |                                    |      |      |          |      |      |          |                                   |      |      |           |      |      |           |                                                                                                                                                                                                                                                |
| Gebel and<br>Vosemer 2014<br>Case control | German Socio-<br>Economic Panel<br>1995 to 2010<br><br>16 to 54 years           | Insecure employment<br><br>Psychological and<br>physical health                                            | Conditional average treatment effects on the treated. ATT is average treatment effect on the treated (health effect of making the transition) and standard error (table 3, page 134)<br><br><table border="1"> <thead> <tr> <th></th> <th colspan="3">Psychological health</th> <th colspan="3">Physical health</th> </tr> <tr> <th></th> <th>ATT</th> <th>S.E</th> <th>N<sub>t</sub>/N<sub>c</sub></th> <th>ATT</th> <th>S.E</th> <th>N<sub>t</sub>/N<sub>c</sub></th> </tr> </thead> <tbody> <tr> <td>Transition into unemployment</td> <td></td> <td></td> <td></td> <td></td> <td></td> <td></td> </tr> <tr> <td>Fixed term contract at <i>t</i></td> <td>-0.72</td> <td>0.11</td> <td>750/2875</td> <td>0.09</td> <td>0.12</td> <td>772/2875</td> </tr> <tr> <td>Permanent contract at <i>t</i></td> <td>-0.81</td> <td>0.06</td> <td>1871/73,125</td> <td>-0.05</td> <td>0.06</td> <td>1816/73,125</td> </tr> <tr> <td>Transition out of unemployment</td> <td></td> <td></td> <td></td> <td></td> <td></td> <td></td> </tr> <tr> <td>Fixed term contract at <i>t</i>+1</td> <td>0.96</td> <td>0.09</td> <td>990/4573</td> <td>0.09</td> <td>0.09</td> <td>990/4573</td> </tr> <tr> <td>Permanent contract at <i>t</i>+1</td> <td>1.05</td> <td>0.09</td> <td>1466/4573</td> <td>0.02</td> <td>0.09</td> <td>1465/4573</td> </tr> </tbody> </table>                                                                                                                                                                                                                                                                                    |                                                                                                                                                                                                                                                                                                                                 | Psychological health      |                                |                               | Physical health              |   |                     |                          | ATT                          | S.E                            | N <sub>t</sub> /N <sub>c</sub> | ATT                          | S.E                  | N <sub>t</sub> /N <sub>c</sub> | Transition into unemployment |                                |                              |             |                              |                      |       | Fixed term contract at <i>t</i> | -0.72                          | 0.11                         | 750/2875                     | 0.09                           | 0.12                | 772/2875 | Permanent contract at <i>t</i> | -0.81                            | 0.06                                  | 1871/73,125                           | -0.05                            | 0.06                 | 1816/73,125 | Transition out of unemployment                                                                                                                                                                                                                                                                                                                                                                                                                                                                                                                                                                                                                                                              |  |  |  |  |  |  | Fixed term contract at <i>t</i> +1 | 0.96 | 0.09 | 990/4573 | 0.09 | 0.09 | 990/4573 | Permanent contract at <i>t</i> +1 | 1.05 | 0.09 | 1466/4573 | 0.02 | 0.09 | 1465/4573 | No: There was no significant impact on the <b>physical health</b> of temporary workers who became unemployed<br><br>Yes: There was a significant negative impact on the <b>psychological health</b> of temporary workers who became unemployed |
|                                           | Psychological health                                                            |                                                                                                            |                                                                                                                                                                                                                                                                                                                                                                                                                                                                                                                                                                                                                                                                                                                                                                                                                                                                                                                                                                                                                                                                                                                                                                                                                                                                                                                                                                                                                                                                                                                                                                                                                                              | Physical health                                                                                                                                                                                                                                                                                                                 |                           |                                |                               |                              |   |                     |                          |                              |                                |                                |                              |                      |                                |                              |                                |                              |             |                              |                      |       |                                 |                                |                              |                              |                                |                     |          |                                |                                  |                                       |                                       |                                  |                      |             |                                                                                                                                                                                                                                                                                                                                                                                                                                                                                                                                                                                                                                                                                             |  |  |  |  |  |  |                                    |      |      |          |      |      |          |                                   |      |      |           |      |      |           |                                                                                                                                                                                                                                                |
|                                           | ATT                                                                             | S.E                                                                                                        | N <sub>t</sub> /N <sub>c</sub>                                                                                                                                                                                                                                                                                                                                                                                                                                                                                                                                                                                                                                                                                                                                                                                                                                                                                                                                                                                                                                                                                                                                                                                                                                                                                                                                                                                                                                                                                                                                                                                                               | ATT                                                                                                                                                                                                                                                                                                                             | S.E                       | N <sub>t</sub> /N <sub>c</sub> |                               |                              |   |                     |                          |                              |                                |                                |                              |                      |                                |                              |                                |                              |             |                              |                      |       |                                 |                                |                              |                              |                                |                     |          |                                |                                  |                                       |                                       |                                  |                      |             |                                                                                                                                                                                                                                                                                                                                                                                                                                                                                                                                                                                                                                                                                             |  |  |  |  |  |  |                                    |      |      |          |      |      |          |                                   |      |      |           |      |      |           |                                                                                                                                                                                                                                                |
| Transition into unemployment              |                                                                                 |                                                                                                            |                                                                                                                                                                                                                                                                                                                                                                                                                                                                                                                                                                                                                                                                                                                                                                                                                                                                                                                                                                                                                                                                                                                                                                                                                                                                                                                                                                                                                                                                                                                                                                                                                                              |                                                                                                                                                                                                                                                                                                                                 |                           |                                |                               |                              |   |                     |                          |                              |                                |                                |                              |                      |                                |                              |                                |                              |             |                              |                      |       |                                 |                                |                              |                              |                                |                     |          |                                |                                  |                                       |                                       |                                  |                      |             |                                                                                                                                                                                                                                                                                                                                                                                                                                                                                                                                                                                                                                                                                             |  |  |  |  |  |  |                                    |      |      |          |      |      |          |                                   |      |      |           |      |      |           |                                                                                                                                                                                                                                                |
| Fixed term contract at <i>t</i>           | -0.72                                                                           | 0.11                                                                                                       | 750/2875                                                                                                                                                                                                                                                                                                                                                                                                                                                                                                                                                                                                                                                                                                                                                                                                                                                                                                                                                                                                                                                                                                                                                                                                                                                                                                                                                                                                                                                                                                                                                                                                                                     | 0.09                                                                                                                                                                                                                                                                                                                            | 0.12                      | 772/2875                       |                               |                              |   |                     |                          |                              |                                |                                |                              |                      |                                |                              |                                |                              |             |                              |                      |       |                                 |                                |                              |                              |                                |                     |          |                                |                                  |                                       |                                       |                                  |                      |             |                                                                                                                                                                                                                                                                                                                                                                                                                                                                                                                                                                                                                                                                                             |  |  |  |  |  |  |                                    |      |      |          |      |      |          |                                   |      |      |           |      |      |           |                                                                                                                                                                                                                                                |
| Permanent contract at <i>t</i>            | -0.81                                                                           | 0.06                                                                                                       | 1871/73,125                                                                                                                                                                                                                                                                                                                                                                                                                                                                                                                                                                                                                                                                                                                                                                                                                                                                                                                                                                                                                                                                                                                                                                                                                                                                                                                                                                                                                                                                                                                                                                                                                                  | -0.05                                                                                                                                                                                                                                                                                                                           | 0.06                      | 1816/73,125                    |                               |                              |   |                     |                          |                              |                                |                                |                              |                      |                                |                              |                                |                              |             |                              |                      |       |                                 |                                |                              |                              |                                |                     |          |                                |                                  |                                       |                                       |                                  |                      |             |                                                                                                                                                                                                                                                                                                                                                                                                                                                                                                                                                                                                                                                                                             |  |  |  |  |  |  |                                    |      |      |          |      |      |          |                                   |      |      |           |      |      |           |                                                                                                                                                                                                                                                |
| Transition out of unemployment            |                                                                                 |                                                                                                            |                                                                                                                                                                                                                                                                                                                                                                                                                                                                                                                                                                                                                                                                                                                                                                                                                                                                                                                                                                                                                                                                                                                                                                                                                                                                                                                                                                                                                                                                                                                                                                                                                                              |                                                                                                                                                                                                                                                                                                                                 |                           |                                |                               |                              |   |                     |                          |                              |                                |                                |                              |                      |                                |                              |                                |                              |             |                              |                      |       |                                 |                                |                              |                              |                                |                     |          |                                |                                  |                                       |                                       |                                  |                      |             |                                                                                                                                                                                                                                                                                                                                                                                                                                                                                                                                                                                                                                                                                             |  |  |  |  |  |  |                                    |      |      |          |      |      |          |                                   |      |      |           |      |      |           |                                                                                                                                                                                                                                                |
| Fixed term contract at <i>t</i> +1        | 0.96                                                                            | 0.09                                                                                                       | 990/4573                                                                                                                                                                                                                                                                                                                                                                                                                                                                                                                                                                                                                                                                                                                                                                                                                                                                                                                                                                                                                                                                                                                                                                                                                                                                                                                                                                                                                                                                                                                                                                                                                                     | 0.09                                                                                                                                                                                                                                                                                                                            | 0.09                      | 990/4573                       |                               |                              |   |                     |                          |                              |                                |                                |                              |                      |                                |                              |                                |                              |             |                              |                      |       |                                 |                                |                              |                              |                                |                     |          |                                |                                  |                                       |                                       |                                  |                      |             |                                                                                                                                                                                                                                                                                                                                                                                                                                                                                                                                                                                                                                                                                             |  |  |  |  |  |  |                                    |      |      |          |      |      |          |                                   |      |      |           |      |      |           |                                                                                                                                                                                                                                                |
| Permanent contract at <i>t</i> +1         | 1.05                                                                            | 0.09                                                                                                       | 1466/4573                                                                                                                                                                                                                                                                                                                                                                                                                                                                                                                                                                                                                                                                                                                                                                                                                                                                                                                                                                                                                                                                                                                                                                                                                                                                                                                                                                                                                                                                                                                                                                                                                                    | 0.02                                                                                                                                                                                                                                                                                                                            | 0.09                      | 1465/4573                      |                               |                              |   |                     |                          |                              |                                |                                |                              |                      |                                |                              |                                |                              |             |                              |                      |       |                                 |                                |                              |                              |                                |                     |          |                                |                                  |                                       |                                       |                                  |                      |             |                                                                                                                                                                                                                                                                                                                                                                                                                                                                                                                                                                                                                                                                                             |  |  |  |  |  |  |                                    |      |      |          |      |      |          |                                   |      |      |           |      |      |           |                                                                                                                                                                                                                                                |
| Griep Y et al. 2016<br>Cross sectional    | Living Conditions<br>Survey, Finland,<br>1994<br><br>18 to 64 years             | Perceived job<br>insecurity<br><br>Psychological<br>complaints, self-rated<br>health, life<br>satisfaction | Estimated means (with standard errors) for outcome variables for the employment status groups - paired comparisons with Bonferroni test<br><br><table border="1"> <thead> <tr> <th></th> <th>Secure permanent (n=2257)</th> <th>Insecure permanent (n=713)</th> <th>Short-term unemployed (n=662)</th> <th>Long-term unemployed (n=345)</th> <th>F</th> <th>Partial eta squared</th> </tr> </thead> <tbody> <tr> <td>Psychological complaints</td> <td>1.33 (0.01) <sup>&lt;2</sup></td> <td>1.42 (0.01) <sup>&lt;1,3</sup></td> <td>1.35 (0.02) <sup>&lt;2,4</sup></td> <td>1.42 (0.02) <sup>&gt;3</sup></td> <td>(3, 3961) = 18.95***</td> <td>0.014</td> </tr> <tr> <td>Subjective complaints</td> <td>1.23 (0.01) <sup>&lt;2,4</sup></td> <td>1.27 (0.01) <sup>&gt;1</sup></td> <td>1.25 (0.01)</td> <td>1.28 (0.01) <sup>&gt;1</sup></td> <td>(3, 3962) = 10.75***</td> <td>0.008</td> </tr> <tr> <td>Self-rated health</td> <td>3.98 (0.03) <sup>&lt;2,4</sup></td> <td>3.89 (0.03) <sup>&lt;1</sup></td> <td>3.94 (0.03) <sup>&gt;4</sup></td> <td>3.74 (0.04) <sup>&lt;1,3</sup></td> <td>(3, 3959) = 7.72***</td> <td>0.006</td> </tr> <tr> <td>Life satisfaction</td> <td>3.24 (0.02) <sup>&gt;2,3,4</sup></td> <td>3.13 (0.02) <sup>&lt;1, &gt;3,4</sup></td> <td>3.00 (0.03) <sup>&gt;4, &lt;1,2</sup></td> <td>2.86 (0.03) <sup>&lt;1,2,3</sup></td> <td>(3, 3956) = 61.98***</td> <td>0.045</td> </tr> </tbody> </table><br>Adjusted for gender, age, education, marital status, children less than 18 years old living at home, income, type of living area and long-term illness/injury. In the pairwise comparisons for the |                                                                                                                                                                                                                                                                                                                                 | Secure permanent (n=2257) | Insecure permanent (n=713)     | Short-term unemployed (n=662) | Long-term unemployed (n=345) | F | Partial eta squared | Psychological complaints | 1.33 (0.01) <sup>&lt;2</sup> | 1.42 (0.01) <sup>&lt;1,3</sup> | 1.35 (0.02) <sup>&lt;2,4</sup> | 1.42 (0.02) <sup>&gt;3</sup> | (3, 3961) = 18.95*** | 0.014                          | Subjective complaints        | 1.23 (0.01) <sup>&lt;2,4</sup> | 1.27 (0.01) <sup>&gt;1</sup> | 1.25 (0.01) | 1.28 (0.01) <sup>&gt;1</sup> | (3, 3962) = 10.75*** | 0.008 | Self-rated health               | 3.98 (0.03) <sup>&lt;2,4</sup> | 3.89 (0.03) <sup>&lt;1</sup> | 3.94 (0.03) <sup>&gt;4</sup> | 3.74 (0.04) <sup>&lt;1,3</sup> | (3, 3959) = 7.72*** | 0.006    | Life satisfaction              | 3.24 (0.02) <sup>&gt;2,3,4</sup> | 3.13 (0.02) <sup>&lt;1, &gt;3,4</sup> | 3.00 (0.03) <sup>&gt;4, &lt;1,2</sup> | 2.86 (0.03) <sup>&lt;1,2,3</sup> | (3, 3956) = 61.98*** | 0.045       | No: Insecure permanent employees reported significantly more <b>psychological complaints</b> than short term unemployed individuals; there was no difference between insecure permanent employees and those who were long-term unemployed<br><br>Insecure permanent employees reported more <b>subjective complaints</b> than the long-term unemployed but fewer than the short-term unemployed<br><br>Insecure permanent employees rated their <b>health</b> as better than the long-term unemployed but worse than the short-term unemployed<br><br>Yes: Insecure permanent employees reported significantly higher <b>life satisfaction</b> than both the short and long-term unemployed |  |  |  |  |  |  |                                    |      |      |          |      |      |          |                                   |      |      |           |      |      |           |                                                                                                                                                                                                                                                |
|                                           | Secure permanent (n=2257)                                                       | Insecure permanent (n=713)                                                                                 | Short-term unemployed (n=662)                                                                                                                                                                                                                                                                                                                                                                                                                                                                                                                                                                                                                                                                                                                                                                                                                                                                                                                                                                                                                                                                                                                                                                                                                                                                                                                                                                                                                                                                                                                                                                                                                | Long-term unemployed (n=345)                                                                                                                                                                                                                                                                                                    | F                         | Partial eta squared            |                               |                              |   |                     |                          |                              |                                |                                |                              |                      |                                |                              |                                |                              |             |                              |                      |       |                                 |                                |                              |                              |                                |                     |          |                                |                                  |                                       |                                       |                                  |                      |             |                                                                                                                                                                                                                                                                                                                                                                                                                                                                                                                                                                                                                                                                                             |  |  |  |  |  |  |                                    |      |      |          |      |      |          |                                   |      |      |           |      |      |           |                                                                                                                                                                                                                                                |
| Psychological complaints                  | 1.33 (0.01) <sup>&lt;2</sup>                                                    | 1.42 (0.01) <sup>&lt;1,3</sup>                                                                             | 1.35 (0.02) <sup>&lt;2,4</sup>                                                                                                                                                                                                                                                                                                                                                                                                                                                                                                                                                                                                                                                                                                                                                                                                                                                                                                                                                                                                                                                                                                                                                                                                                                                                                                                                                                                                                                                                                                                                                                                                               | 1.42 (0.02) <sup>&gt;3</sup>                                                                                                                                                                                                                                                                                                    | (3, 3961) = 18.95***      | 0.014                          |                               |                              |   |                     |                          |                              |                                |                                |                              |                      |                                |                              |                                |                              |             |                              |                      |       |                                 |                                |                              |                              |                                |                     |          |                                |                                  |                                       |                                       |                                  |                      |             |                                                                                                                                                                                                                                                                                                                                                                                                                                                                                                                                                                                                                                                                                             |  |  |  |  |  |  |                                    |      |      |          |      |      |          |                                   |      |      |           |      |      |           |                                                                                                                                                                                                                                                |
| Subjective complaints                     | 1.23 (0.01) <sup>&lt;2,4</sup>                                                  | 1.27 (0.01) <sup>&gt;1</sup>                                                                               | 1.25 (0.01)                                                                                                                                                                                                                                                                                                                                                                                                                                                                                                                                                                                                                                                                                                                                                                                                                                                                                                                                                                                                                                                                                                                                                                                                                                                                                                                                                                                                                                                                                                                                                                                                                                  | 1.28 (0.01) <sup>&gt;1</sup>                                                                                                                                                                                                                                                                                                    | (3, 3962) = 10.75***      | 0.008                          |                               |                              |   |                     |                          |                              |                                |                                |                              |                      |                                |                              |                                |                              |             |                              |                      |       |                                 |                                |                              |                              |                                |                     |          |                                |                                  |                                       |                                       |                                  |                      |             |                                                                                                                                                                                                                                                                                                                                                                                                                                                                                                                                                                                                                                                                                             |  |  |  |  |  |  |                                    |      |      |          |      |      |          |                                   |      |      |           |      |      |           |                                                                                                                                                                                                                                                |
| Self-rated health                         | 3.98 (0.03) <sup>&lt;2,4</sup>                                                  | 3.89 (0.03) <sup>&lt;1</sup>                                                                               | 3.94 (0.03) <sup>&gt;4</sup>                                                                                                                                                                                                                                                                                                                                                                                                                                                                                                                                                                                                                                                                                                                                                                                                                                                                                                                                                                                                                                                                                                                                                                                                                                                                                                                                                                                                                                                                                                                                                                                                                 | 3.74 (0.04) <sup>&lt;1,3</sup>                                                                                                                                                                                                                                                                                                  | (3, 3959) = 7.72***       | 0.006                          |                               |                              |   |                     |                          |                              |                                |                                |                              |                      |                                |                              |                                |                              |             |                              |                      |       |                                 |                                |                              |                              |                                |                     |          |                                |                                  |                                       |                                       |                                  |                      |             |                                                                                                                                                                                                                                                                                                                                                                                                                                                                                                                                                                                                                                                                                             |  |  |  |  |  |  |                                    |      |      |          |      |      |          |                                   |      |      |           |      |      |           |                                                                                                                                                                                                                                                |
| Life satisfaction                         | 3.24 (0.02) <sup>&gt;2,3,4</sup>                                                | 3.13 (0.02) <sup>&lt;1, &gt;3,4</sup>                                                                      | 3.00 (0.03) <sup>&gt;4, &lt;1,2</sup>                                                                                                                                                                                                                                                                                                                                                                                                                                                                                                                                                                                                                                                                                                                                                                                                                                                                                                                                                                                                                                                                                                                                                                                                                                                                                                                                                                                                                                                                                                                                                                                                        | 2.86 (0.03) <sup>&lt;1,2,3</sup>                                                                                                                                                                                                                                                                                                | (3, 3956) = 61.98***      | 0.045                          |                               |                              |   |                     |                          |                              |                                |                                |                              |                      |                                |                              |                                |                              |             |                              |                      |       |                                 |                                |                              |                              |                                |                     |          |                                |                                  |                                       |                                       |                                  |                      |             |                                                                                                                                                                                                                                                                                                                                                                                                                                                                                                                                                                                                                                                                                             |  |  |  |  |  |  |                                    |      |      |          |      |      |          |                                   |      |      |           |      |      |           |                                                                                                                                                                                                                                                |

| Reference/<br>Study design                           | Data source/<br>Population<br>range                                     | Poor/bad job<br>definition<br>Outcome                                                       | Results from paper                                                                                                                                                                                                                                                                                                                                                                                                                                                                                                                                                                                                                                                                                                                                                                                                                                                                                                                                                                                                                                                                                                                                                                                                                                                                                                                                                                                                                                                                                                                                                                                                 | Is any job better than no job?<br>Where OR has been calculated by OES exposure is bad/poor job, is unadjusted and data used to calculate may have been derived from percentages in study results tables |     |        |            |                    |           |     |     |                 |       |                                 |                                      |                        |                                     |                      |                         |                     |                        |                     |                        |                                                                                                                                                                                                                                                                                                                                                                            |     |         |            |                         |           |         |  |                 |      |      |      |            |         |      |      |            |          |      |      |                                                                                                                                                                                                                                                                                                                                                                                                                                                                                                                                                                                                                                                                                                                                                                                                                                                                                                                                                                                                                                                                                                                                                                                                                                                                                                                                                                                                                                                                                                                                                                                                                                                                                                                                                                                                                                                                                                                                                                                                                   |             |      |                       |             |            |            |                  |  |                       |          |            |            |  |                  |             |                       |    |     |            |    |    |            |  |                       |            |            |            |  |            |               |                       |    |     |            |    |    |
|------------------------------------------------------|-------------------------------------------------------------------------|---------------------------------------------------------------------------------------------|--------------------------------------------------------------------------------------------------------------------------------------------------------------------------------------------------------------------------------------------------------------------------------------------------------------------------------------------------------------------------------------------------------------------------------------------------------------------------------------------------------------------------------------------------------------------------------------------------------------------------------------------------------------------------------------------------------------------------------------------------------------------------------------------------------------------------------------------------------------------------------------------------------------------------------------------------------------------------------------------------------------------------------------------------------------------------------------------------------------------------------------------------------------------------------------------------------------------------------------------------------------------------------------------------------------------------------------------------------------------------------------------------------------------------------------------------------------------------------------------------------------------------------------------------------------------------------------------------------------------|---------------------------------------------------------------------------------------------------------------------------------------------------------------------------------------------------------|-----|--------|------------|--------------------|-----------|-----|-----|-----------------|-------|---------------------------------|--------------------------------------|------------------------|-------------------------------------|----------------------|-------------------------|---------------------|------------------------|---------------------|------------------------|----------------------------------------------------------------------------------------------------------------------------------------------------------------------------------------------------------------------------------------------------------------------------------------------------------------------------------------------------------------------------|-----|---------|------------|-------------------------|-----------|---------|--|-----------------|------|------|------|------------|---------|------|------|------------|----------|------|------|-------------------------------------------------------------------------------------------------------------------------------------------------------------------------------------------------------------------------------------------------------------------------------------------------------------------------------------------------------------------------------------------------------------------------------------------------------------------------------------------------------------------------------------------------------------------------------------------------------------------------------------------------------------------------------------------------------------------------------------------------------------------------------------------------------------------------------------------------------------------------------------------------------------------------------------------------------------------------------------------------------------------------------------------------------------------------------------------------------------------------------------------------------------------------------------------------------------------------------------------------------------------------------------------------------------------------------------------------------------------------------------------------------------------------------------------------------------------------------------------------------------------------------------------------------------------------------------------------------------------------------------------------------------------------------------------------------------------------------------------------------------------------------------------------------------------------------------------------------------------------------------------------------------------------------------------------------------------------------------------------------------------|-------------|------|-----------------------|-------------|------------|------------|------------------|--|-----------------------|----------|------------|------------|--|------------------|-------------|-----------------------|----|-----|------------|----|----|------------|--|-----------------------|------------|------------|------------|--|------------|---------------|-----------------------|----|-----|------------|----|----|
|                                                      |                                                                         |                                                                                             | <p>significance level test used Bonferroni adjustment for multiple comparisons. Only significant pairwise comparisons are reported (<math>p &lt; 0.05</math>). The superscript numbers indicate for which between-classes comparisons the means differ significantly (<math>p &lt; 0.05</math>). The &lt; or &gt; preceding the superscript numbers indicate the direction of the significance difference in means.<br/>*<math>p &lt; 0.05</math>, **<math>p &lt; 0.01</math>, ***<math>p &lt; 0.001</math></p>                                                                                                                                                                                                                                                                                                                                                                                                                                                                                                                                                                                                                                                                                                                                                                                                                                                                                                                                                                                                                                                                                                    |                                                                                                                                                                                                         |     |        |            |                    |           |     |     |                 |       |                                 |                                      |                        |                                     |                      |                         |                     |                        |                     |                        |                                                                                                                                                                                                                                                                                                                                                                            |     |         |            |                         |           |         |  |                 |      |      |      |            |         |      |      |            |          |      |      |                                                                                                                                                                                                                                                                                                                                                                                                                                                                                                                                                                                                                                                                                                                                                                                                                                                                                                                                                                                                                                                                                                                                                                                                                                                                                                                                                                                                                                                                                                                                                                                                                                                                                                                                                                                                                                                                                                                                                                                                                   |             |      |                       |             |            |            |                  |  |                       |          |            |            |  |                  |             |                       |    |     |            |    |    |            |  |                       |            |            |            |  |            |               |                       |    |     |            |    |    |
| Grzywacz JG and Dooley D 2003<br><br>Cross sectional | National Survey of Midlife Development, USA, 1995<br><br>25 to 74 years | Inadequate employment; low pay and psychological aspects<br><br>Physical health, depression | <p>Logistic regression results estimating the association between employment status and poor/fair physical health (unweighted data).</p> <table border="1"> <thead> <tr> <th>Employment status</th> <th>B</th> <th>SE (B)</th> <th>odds ratio</th> </tr> </thead> <tbody> <tr> <td>Optimal employment</td> <td>Reference</td> <td></td> <td></td> </tr> <tr> <td>Barely adequate</td> <td>0.45*</td> <td>0.26</td> <td>1.57</td> </tr> <tr> <td>Inadequate</td> <td>0.59**</td> <td>0.26</td> <td>1.80</td> </tr> <tr> <td>Unemployed</td> <td>1.81****</td> <td>0.31</td> <td>6.14</td> </tr> </tbody> </table> <p>* <math>p \leq 0.10</math><br/>** <math>p \leq 0.05</math><br/>*** <math>p \leq 0.01</math><br/>**** <math>p \leq 0.001</math> (two tailed)</p> <p>Adjusted for sociodemographic characteristics</p> <p>Logistic regression estimating the association between employment status and depression</p> <table border="1"> <thead> <tr> <th>Employment status</th> <th>B</th> <th>SE (B)</th> <th>odds ratio</th> </tr> </thead> <tbody> <tr> <td>Optimal employment</td> <td>Reference</td> <td></td> <td></td> </tr> <tr> <td>Barely adequate</td> <td>0.21</td> <td>0.23</td> <td>1.24</td> </tr> <tr> <td>Inadequate</td> <td>0.72***</td> <td>0.23</td> <td>2.06</td> </tr> <tr> <td>Unemployed</td> <td>1.22****</td> <td>0.30</td> <td>3.37</td> </tr> </tbody> </table> <p>Adjusted for age, gender, race/ethnicity, and socioeconomic status</p> <p>We did not include data from the California Work and Health Survey because the study population was not nationally representative</p> | Employment status                                                                                                                                                                                       | B   | SE (B) | odds ratio | Optimal employment | Reference |     |     | Barely adequate | 0.45* | 0.26                            | 1.57                                 | Inadequate             | 0.59**                              | 0.26                 | 1.80                    | Unemployed          | 1.81****               | 0.31                | 6.14                   | Employment status                                                                                                                                                                                                                                                                                                                                                          | B   | SE (B)  | odds ratio | Optimal employment      | Reference |         |  | Barely adequate | 0.21 | 0.23 | 1.24 | Inadequate | 0.72*** | 0.23 | 2.06 | Unemployed | 1.22**** | 0.30 | 3.37 | <p>Yes: those who were in inadequate employment were significantly less likely to report <b>poor/fair health</b> than those who were unemployed.</p> <p>No: those who were in inadequate employment were less likely to meet the criteria for <b>depression</b> than those who were unemployed. However, this difference is not statistically significant</p> <p>Text states that there were 3032 participants in MIDUS. Footnotes from table 1 say 21 participants excluded from MIDUS so assume overall participants 3011. Table 2b gives % from MIDUS sample in the different employment categories.</p> <table border="1"> <thead> <tr> <th>Total MIDUS</th> <th>3011</th> </tr> </thead> <tbody> <tr> <td>Inadequate employment</td> <td>(15.4%) 464</td> </tr> <tr> <td>Unemployed</td> <td>(4.1%) 123</td> </tr> </tbody> </table> <p>From Fig 1 page 1756</p> <table border="1"> <thead> <tr> <th>Fair/poor health</th> <th></th> </tr> </thead> <tbody> <tr> <td>Inadequate employment</td> <td>(17%) 79</td> </tr> <tr> <td>Unemployed</td> <td>(31.5%) 39</td> </tr> </tbody> </table> <table border="1"> <thead> <tr> <th></th> <th>Fair/poor health</th> <th>Good health</th> </tr> </thead> <tbody> <tr> <td>Inadequate employment</td> <td>79</td> <td>385</td> </tr> <tr> <td>Unemployed</td> <td>39</td> <td>84</td> </tr> </tbody> </table> <p>Odds ratio 0.44, 95% CI 0.28 to 0.69 <math>p = 0.0004</math></p> <p>From fig 2 page 1756</p> <table border="1"> <thead> <tr> <th>Depression</th> <th></th> </tr> </thead> <tbody> <tr> <td>Inadequate employment</td> <td>(18.6%) 86</td> </tr> <tr> <td>Unemployed</td> <td>(23.9%) 29</td> </tr> </tbody> </table> <table border="1"> <thead> <tr> <th></th> <th>Depression</th> <th>No depression</th> </tr> </thead> <tbody> <tr> <td>Inadequate employment</td> <td>86</td> <td>378</td> </tr> <tr> <td>Unemployed</td> <td>29</td> <td>94</td> </tr> </tbody> </table> <p>Odds ratio 0.73, 95% CI 0.46 to 1.19 <math>p = 0.2114</math></p> | Total MIDUS | 3011 | Inadequate employment | (15.4%) 464 | Unemployed | (4.1%) 123 | Fair/poor health |  | Inadequate employment | (17%) 79 | Unemployed | (31.5%) 39 |  | Fair/poor health | Good health | Inadequate employment | 79 | 385 | Unemployed | 39 | 84 | Depression |  | Inadequate employment | (18.6%) 86 | Unemployed | (23.9%) 29 |  | Depression | No depression | Inadequate employment | 86 | 378 | Unemployed | 29 | 94 |
| Employment status                                    | B                                                                       | SE (B)                                                                                      | odds ratio                                                                                                                                                                                                                                                                                                                                                                                                                                                                                                                                                                                                                                                                                                                                                                                                                                                                                                                                                                                                                                                                                                                                                                                                                                                                                                                                                                                                                                                                                                                                                                                                         |                                                                                                                                                                                                         |     |        |            |                    |           |     |     |                 |       |                                 |                                      |                        |                                     |                      |                         |                     |                        |                     |                        |                                                                                                                                                                                                                                                                                                                                                                            |     |         |            |                         |           |         |  |                 |      |      |      |            |         |      |      |            |          |      |      |                                                                                                                                                                                                                                                                                                                                                                                                                                                                                                                                                                                                                                                                                                                                                                                                                                                                                                                                                                                                                                                                                                                                                                                                                                                                                                                                                                                                                                                                                                                                                                                                                                                                                                                                                                                                                                                                                                                                                                                                                   |             |      |                       |             |            |            |                  |  |                       |          |            |            |  |                  |             |                       |    |     |            |    |    |            |  |                       |            |            |            |  |            |               |                       |    |     |            |    |    |
| Optimal employment                                   | Reference                                                               |                                                                                             |                                                                                                                                                                                                                                                                                                                                                                                                                                                                                                                                                                                                                                                                                                                                                                                                                                                                                                                                                                                                                                                                                                                                                                                                                                                                                                                                                                                                                                                                                                                                                                                                                    |                                                                                                                                                                                                         |     |        |            |                    |           |     |     |                 |       |                                 |                                      |                        |                                     |                      |                         |                     |                        |                     |                        |                                                                                                                                                                                                                                                                                                                                                                            |     |         |            |                         |           |         |  |                 |      |      |      |            |         |      |      |            |          |      |      |                                                                                                                                                                                                                                                                                                                                                                                                                                                                                                                                                                                                                                                                                                                                                                                                                                                                                                                                                                                                                                                                                                                                                                                                                                                                                                                                                                                                                                                                                                                                                                                                                                                                                                                                                                                                                                                                                                                                                                                                                   |             |      |                       |             |            |            |                  |  |                       |          |            |            |  |                  |             |                       |    |     |            |    |    |            |  |                       |            |            |            |  |            |               |                       |    |     |            |    |    |
| Barely adequate                                      | 0.45*                                                                   | 0.26                                                                                        | 1.57                                                                                                                                                                                                                                                                                                                                                                                                                                                                                                                                                                                                                                                                                                                                                                                                                                                                                                                                                                                                                                                                                                                                                                                                                                                                                                                                                                                                                                                                                                                                                                                                               |                                                                                                                                                                                                         |     |        |            |                    |           |     |     |                 |       |                                 |                                      |                        |                                     |                      |                         |                     |                        |                     |                        |                                                                                                                                                                                                                                                                                                                                                                            |     |         |            |                         |           |         |  |                 |      |      |      |            |         |      |      |            |          |      |      |                                                                                                                                                                                                                                                                                                                                                                                                                                                                                                                                                                                                                                                                                                                                                                                                                                                                                                                                                                                                                                                                                                                                                                                                                                                                                                                                                                                                                                                                                                                                                                                                                                                                                                                                                                                                                                                                                                                                                                                                                   |             |      |                       |             |            |            |                  |  |                       |          |            |            |  |                  |             |                       |    |     |            |    |    |            |  |                       |            |            |            |  |            |               |                       |    |     |            |    |    |
| Inadequate                                           | 0.59**                                                                  | 0.26                                                                                        | 1.80                                                                                                                                                                                                                                                                                                                                                                                                                                                                                                                                                                                                                                                                                                                                                                                                                                                                                                                                                                                                                                                                                                                                                                                                                                                                                                                                                                                                                                                                                                                                                                                                               |                                                                                                                                                                                                         |     |        |            |                    |           |     |     |                 |       |                                 |                                      |                        |                                     |                      |                         |                     |                        |                     |                        |                                                                                                                                                                                                                                                                                                                                                                            |     |         |            |                         |           |         |  |                 |      |      |      |            |         |      |      |            |          |      |      |                                                                                                                                                                                                                                                                                                                                                                                                                                                                                                                                                                                                                                                                                                                                                                                                                                                                                                                                                                                                                                                                                                                                                                                                                                                                                                                                                                                                                                                                                                                                                                                                                                                                                                                                                                                                                                                                                                                                                                                                                   |             |      |                       |             |            |            |                  |  |                       |          |            |            |  |                  |             |                       |    |     |            |    |    |            |  |                       |            |            |            |  |            |               |                       |    |     |            |    |    |
| Unemployed                                           | 1.81****                                                                | 0.31                                                                                        | 6.14                                                                                                                                                                                                                                                                                                                                                                                                                                                                                                                                                                                                                                                                                                                                                                                                                                                                                                                                                                                                                                                                                                                                                                                                                                                                                                                                                                                                                                                                                                                                                                                                               |                                                                                                                                                                                                         |     |        |            |                    |           |     |     |                 |       |                                 |                                      |                        |                                     |                      |                         |                     |                        |                     |                        |                                                                                                                                                                                                                                                                                                                                                                            |     |         |            |                         |           |         |  |                 |      |      |      |            |         |      |      |            |          |      |      |                                                                                                                                                                                                                                                                                                                                                                                                                                                                                                                                                                                                                                                                                                                                                                                                                                                                                                                                                                                                                                                                                                                                                                                                                                                                                                                                                                                                                                                                                                                                                                                                                                                                                                                                                                                                                                                                                                                                                                                                                   |             |      |                       |             |            |            |                  |  |                       |          |            |            |  |                  |             |                       |    |     |            |    |    |            |  |                       |            |            |            |  |            |               |                       |    |     |            |    |    |
| Employment status                                    | B                                                                       | SE (B)                                                                                      | odds ratio                                                                                                                                                                                                                                                                                                                                                                                                                                                                                                                                                                                                                                                                                                                                                                                                                                                                                                                                                                                                                                                                                                                                                                                                                                                                                                                                                                                                                                                                                                                                                                                                         |                                                                                                                                                                                                         |     |        |            |                    |           |     |     |                 |       |                                 |                                      |                        |                                     |                      |                         |                     |                        |                     |                        |                                                                                                                                                                                                                                                                                                                                                                            |     |         |            |                         |           |         |  |                 |      |      |      |            |         |      |      |            |          |      |      |                                                                                                                                                                                                                                                                                                                                                                                                                                                                                                                                                                                                                                                                                                                                                                                                                                                                                                                                                                                                                                                                                                                                                                                                                                                                                                                                                                                                                                                                                                                                                                                                                                                                                                                                                                                                                                                                                                                                                                                                                   |             |      |                       |             |            |            |                  |  |                       |          |            |            |  |                  |             |                       |    |     |            |    |    |            |  |                       |            |            |            |  |            |               |                       |    |     |            |    |    |
| Optimal employment                                   | Reference                                                               |                                                                                             |                                                                                                                                                                                                                                                                                                                                                                                                                                                                                                                                                                                                                                                                                                                                                                                                                                                                                                                                                                                                                                                                                                                                                                                                                                                                                                                                                                                                                                                                                                                                                                                                                    |                                                                                                                                                                                                         |     |        |            |                    |           |     |     |                 |       |                                 |                                      |                        |                                     |                      |                         |                     |                        |                     |                        |                                                                                                                                                                                                                                                                                                                                                                            |     |         |            |                         |           |         |  |                 |      |      |      |            |         |      |      |            |          |      |      |                                                                                                                                                                                                                                                                                                                                                                                                                                                                                                                                                                                                                                                                                                                                                                                                                                                                                                                                                                                                                                                                                                                                                                                                                                                                                                                                                                                                                                                                                                                                                                                                                                                                                                                                                                                                                                                                                                                                                                                                                   |             |      |                       |             |            |            |                  |  |                       |          |            |            |  |                  |             |                       |    |     |            |    |    |            |  |                       |            |            |            |  |            |               |                       |    |     |            |    |    |
| Barely adequate                                      | 0.21                                                                    | 0.23                                                                                        | 1.24                                                                                                                                                                                                                                                                                                                                                                                                                                                                                                                                                                                                                                                                                                                                                                                                                                                                                                                                                                                                                                                                                                                                                                                                                                                                                                                                                                                                                                                                                                                                                                                                               |                                                                                                                                                                                                         |     |        |            |                    |           |     |     |                 |       |                                 |                                      |                        |                                     |                      |                         |                     |                        |                     |                        |                                                                                                                                                                                                                                                                                                                                                                            |     |         |            |                         |           |         |  |                 |      |      |      |            |         |      |      |            |          |      |      |                                                                                                                                                                                                                                                                                                                                                                                                                                                                                                                                                                                                                                                                                                                                                                                                                                                                                                                                                                                                                                                                                                                                                                                                                                                                                                                                                                                                                                                                                                                                                                                                                                                                                                                                                                                                                                                                                                                                                                                                                   |             |      |                       |             |            |            |                  |  |                       |          |            |            |  |                  |             |                       |    |     |            |    |    |            |  |                       |            |            |            |  |            |               |                       |    |     |            |    |    |
| Inadequate                                           | 0.72***                                                                 | 0.23                                                                                        | 2.06                                                                                                                                                                                                                                                                                                                                                                                                                                                                                                                                                                                                                                                                                                                                                                                                                                                                                                                                                                                                                                                                                                                                                                                                                                                                                                                                                                                                                                                                                                                                                                                                               |                                                                                                                                                                                                         |     |        |            |                    |           |     |     |                 |       |                                 |                                      |                        |                                     |                      |                         |                     |                        |                     |                        |                                                                                                                                                                                                                                                                                                                                                                            |     |         |            |                         |           |         |  |                 |      |      |      |            |         |      |      |            |          |      |      |                                                                                                                                                                                                                                                                                                                                                                                                                                                                                                                                                                                                                                                                                                                                                                                                                                                                                                                                                                                                                                                                                                                                                                                                                                                                                                                                                                                                                                                                                                                                                                                                                                                                                                                                                                                                                                                                                                                                                                                                                   |             |      |                       |             |            |            |                  |  |                       |          |            |            |  |                  |             |                       |    |     |            |    |    |            |  |                       |            |            |            |  |            |               |                       |    |     |            |    |    |
| Unemployed                                           | 1.22****                                                                | 0.30                                                                                        | 3.37                                                                                                                                                                                                                                                                                                                                                                                                                                                                                                                                                                                                                                                                                                                                                                                                                                                                                                                                                                                                                                                                                                                                                                                                                                                                                                                                                                                                                                                                                                                                                                                                               |                                                                                                                                                                                                         |     |        |            |                    |           |     |     |                 |       |                                 |                                      |                        |                                     |                      |                         |                     |                        |                     |                        |                                                                                                                                                                                                                                                                                                                                                                            |     |         |            |                         |           |         |  |                 |      |      |      |            |         |      |      |            |          |      |      |                                                                                                                                                                                                                                                                                                                                                                                                                                                                                                                                                                                                                                                                                                                                                                                                                                                                                                                                                                                                                                                                                                                                                                                                                                                                                                                                                                                                                                                                                                                                                                                                                                                                                                                                                                                                                                                                                                                                                                                                                   |             |      |                       |             |            |            |                  |  |                       |          |            |            |  |                  |             |                       |    |     |            |    |    |            |  |                       |            |            |            |  |            |               |                       |    |     |            |    |    |
| Total MIDUS                                          | 3011                                                                    |                                                                                             |                                                                                                                                                                                                                                                                                                                                                                                                                                                                                                                                                                                                                                                                                                                                                                                                                                                                                                                                                                                                                                                                                                                                                                                                                                                                                                                                                                                                                                                                                                                                                                                                                    |                                                                                                                                                                                                         |     |        |            |                    |           |     |     |                 |       |                                 |                                      |                        |                                     |                      |                         |                     |                        |                     |                        |                                                                                                                                                                                                                                                                                                                                                                            |     |         |            |                         |           |         |  |                 |      |      |      |            |         |      |      |            |          |      |      |                                                                                                                                                                                                                                                                                                                                                                                                                                                                                                                                                                                                                                                                                                                                                                                                                                                                                                                                                                                                                                                                                                                                                                                                                                                                                                                                                                                                                                                                                                                                                                                                                                                                                                                                                                                                                                                                                                                                                                                                                   |             |      |                       |             |            |            |                  |  |                       |          |            |            |  |                  |             |                       |    |     |            |    |    |            |  |                       |            |            |            |  |            |               |                       |    |     |            |    |    |
| Inadequate employment                                | (15.4%) 464                                                             |                                                                                             |                                                                                                                                                                                                                                                                                                                                                                                                                                                                                                                                                                                                                                                                                                                                                                                                                                                                                                                                                                                                                                                                                                                                                                                                                                                                                                                                                                                                                                                                                                                                                                                                                    |                                                                                                                                                                                                         |     |        |            |                    |           |     |     |                 |       |                                 |                                      |                        |                                     |                      |                         |                     |                        |                     |                        |                                                                                                                                                                                                                                                                                                                                                                            |     |         |            |                         |           |         |  |                 |      |      |      |            |         |      |      |            |          |      |      |                                                                                                                                                                                                                                                                                                                                                                                                                                                                                                                                                                                                                                                                                                                                                                                                                                                                                                                                                                                                                                                                                                                                                                                                                                                                                                                                                                                                                                                                                                                                                                                                                                                                                                                                                                                                                                                                                                                                                                                                                   |             |      |                       |             |            |            |                  |  |                       |          |            |            |  |                  |             |                       |    |     |            |    |    |            |  |                       |            |            |            |  |            |               |                       |    |     |            |    |    |
| Unemployed                                           | (4.1%) 123                                                              |                                                                                             |                                                                                                                                                                                                                                                                                                                                                                                                                                                                                                                                                                                                                                                                                                                                                                                                                                                                                                                                                                                                                                                                                                                                                                                                                                                                                                                                                                                                                                                                                                                                                                                                                    |                                                                                                                                                                                                         |     |        |            |                    |           |     |     |                 |       |                                 |                                      |                        |                                     |                      |                         |                     |                        |                     |                        |                                                                                                                                                                                                                                                                                                                                                                            |     |         |            |                         |           |         |  |                 |      |      |      |            |         |      |      |            |          |      |      |                                                                                                                                                                                                                                                                                                                                                                                                                                                                                                                                                                                                                                                                                                                                                                                                                                                                                                                                                                                                                                                                                                                                                                                                                                                                                                                                                                                                                                                                                                                                                                                                                                                                                                                                                                                                                                                                                                                                                                                                                   |             |      |                       |             |            |            |                  |  |                       |          |            |            |  |                  |             |                       |    |     |            |    |    |            |  |                       |            |            |            |  |            |               |                       |    |     |            |    |    |
| Fair/poor health                                     |                                                                         |                                                                                             |                                                                                                                                                                                                                                                                                                                                                                                                                                                                                                                                                                                                                                                                                                                                                                                                                                                                                                                                                                                                                                                                                                                                                                                                                                                                                                                                                                                                                                                                                                                                                                                                                    |                                                                                                                                                                                                         |     |        |            |                    |           |     |     |                 |       |                                 |                                      |                        |                                     |                      |                         |                     |                        |                     |                        |                                                                                                                                                                                                                                                                                                                                                                            |     |         |            |                         |           |         |  |                 |      |      |      |            |         |      |      |            |          |      |      |                                                                                                                                                                                                                                                                                                                                                                                                                                                                                                                                                                                                                                                                                                                                                                                                                                                                                                                                                                                                                                                                                                                                                                                                                                                                                                                                                                                                                                                                                                                                                                                                                                                                                                                                                                                                                                                                                                                                                                                                                   |             |      |                       |             |            |            |                  |  |                       |          |            |            |  |                  |             |                       |    |     |            |    |    |            |  |                       |            |            |            |  |            |               |                       |    |     |            |    |    |
| Inadequate employment                                | (17%) 79                                                                |                                                                                             |                                                                                                                                                                                                                                                                                                                                                                                                                                                                                                                                                                                                                                                                                                                                                                                                                                                                                                                                                                                                                                                                                                                                                                                                                                                                                                                                                                                                                                                                                                                                                                                                                    |                                                                                                                                                                                                         |     |        |            |                    |           |     |     |                 |       |                                 |                                      |                        |                                     |                      |                         |                     |                        |                     |                        |                                                                                                                                                                                                                                                                                                                                                                            |     |         |            |                         |           |         |  |                 |      |      |      |            |         |      |      |            |          |      |      |                                                                                                                                                                                                                                                                                                                                                                                                                                                                                                                                                                                                                                                                                                                                                                                                                                                                                                                                                                                                                                                                                                                                                                                                                                                                                                                                                                                                                                                                                                                                                                                                                                                                                                                                                                                                                                                                                                                                                                                                                   |             |      |                       |             |            |            |                  |  |                       |          |            |            |  |                  |             |                       |    |     |            |    |    |            |  |                       |            |            |            |  |            |               |                       |    |     |            |    |    |
| Unemployed                                           | (31.5%) 39                                                              |                                                                                             |                                                                                                                                                                                                                                                                                                                                                                                                                                                                                                                                                                                                                                                                                                                                                                                                                                                                                                                                                                                                                                                                                                                                                                                                                                                                                                                                                                                                                                                                                                                                                                                                                    |                                                                                                                                                                                                         |     |        |            |                    |           |     |     |                 |       |                                 |                                      |                        |                                     |                      |                         |                     |                        |                     |                        |                                                                                                                                                                                                                                                                                                                                                                            |     |         |            |                         |           |         |  |                 |      |      |      |            |         |      |      |            |          |      |      |                                                                                                                                                                                                                                                                                                                                                                                                                                                                                                                                                                                                                                                                                                                                                                                                                                                                                                                                                                                                                                                                                                                                                                                                                                                                                                                                                                                                                                                                                                                                                                                                                                                                                                                                                                                                                                                                                                                                                                                                                   |             |      |                       |             |            |            |                  |  |                       |          |            |            |  |                  |             |                       |    |     |            |    |    |            |  |                       |            |            |            |  |            |               |                       |    |     |            |    |    |
|                                                      | Fair/poor health                                                        | Good health                                                                                 |                                                                                                                                                                                                                                                                                                                                                                                                                                                                                                                                                                                                                                                                                                                                                                                                                                                                                                                                                                                                                                                                                                                                                                                                                                                                                                                                                                                                                                                                                                                                                                                                                    |                                                                                                                                                                                                         |     |        |            |                    |           |     |     |                 |       |                                 |                                      |                        |                                     |                      |                         |                     |                        |                     |                        |                                                                                                                                                                                                                                                                                                                                                                            |     |         |            |                         |           |         |  |                 |      |      |      |            |         |      |      |            |          |      |      |                                                                                                                                                                                                                                                                                                                                                                                                                                                                                                                                                                                                                                                                                                                                                                                                                                                                                                                                                                                                                                                                                                                                                                                                                                                                                                                                                                                                                                                                                                                                                                                                                                                                                                                                                                                                                                                                                                                                                                                                                   |             |      |                       |             |            |            |                  |  |                       |          |            |            |  |                  |             |                       |    |     |            |    |    |            |  |                       |            |            |            |  |            |               |                       |    |     |            |    |    |
| Inadequate employment                                | 79                                                                      | 385                                                                                         |                                                                                                                                                                                                                                                                                                                                                                                                                                                                                                                                                                                                                                                                                                                                                                                                                                                                                                                                                                                                                                                                                                                                                                                                                                                                                                                                                                                                                                                                                                                                                                                                                    |                                                                                                                                                                                                         |     |        |            |                    |           |     |     |                 |       |                                 |                                      |                        |                                     |                      |                         |                     |                        |                     |                        |                                                                                                                                                                                                                                                                                                                                                                            |     |         |            |                         |           |         |  |                 |      |      |      |            |         |      |      |            |          |      |      |                                                                                                                                                                                                                                                                                                                                                                                                                                                                                                                                                                                                                                                                                                                                                                                                                                                                                                                                                                                                                                                                                                                                                                                                                                                                                                                                                                                                                                                                                                                                                                                                                                                                                                                                                                                                                                                                                                                                                                                                                   |             |      |                       |             |            |            |                  |  |                       |          |            |            |  |                  |             |                       |    |     |            |    |    |            |  |                       |            |            |            |  |            |               |                       |    |     |            |    |    |
| Unemployed                                           | 39                                                                      | 84                                                                                          |                                                                                                                                                                                                                                                                                                                                                                                                                                                                                                                                                                                                                                                                                                                                                                                                                                                                                                                                                                                                                                                                                                                                                                                                                                                                                                                                                                                                                                                                                                                                                                                                                    |                                                                                                                                                                                                         |     |        |            |                    |           |     |     |                 |       |                                 |                                      |                        |                                     |                      |                         |                     |                        |                     |                        |                                                                                                                                                                                                                                                                                                                                                                            |     |         |            |                         |           |         |  |                 |      |      |      |            |         |      |      |            |          |      |      |                                                                                                                                                                                                                                                                                                                                                                                                                                                                                                                                                                                                                                                                                                                                                                                                                                                                                                                                                                                                                                                                                                                                                                                                                                                                                                                                                                                                                                                                                                                                                                                                                                                                                                                                                                                                                                                                                                                                                                                                                   |             |      |                       |             |            |            |                  |  |                       |          |            |            |  |                  |             |                       |    |     |            |    |    |            |  |                       |            |            |            |  |            |               |                       |    |     |            |    |    |
| Depression                                           |                                                                         |                                                                                             |                                                                                                                                                                                                                                                                                                                                                                                                                                                                                                                                                                                                                                                                                                                                                                                                                                                                                                                                                                                                                                                                                                                                                                                                                                                                                                                                                                                                                                                                                                                                                                                                                    |                                                                                                                                                                                                         |     |        |            |                    |           |     |     |                 |       |                                 |                                      |                        |                                     |                      |                         |                     |                        |                     |                        |                                                                                                                                                                                                                                                                                                                                                                            |     |         |            |                         |           |         |  |                 |      |      |      |            |         |      |      |            |          |      |      |                                                                                                                                                                                                                                                                                                                                                                                                                                                                                                                                                                                                                                                                                                                                                                                                                                                                                                                                                                                                                                                                                                                                                                                                                                                                                                                                                                                                                                                                                                                                                                                                                                                                                                                                                                                                                                                                                                                                                                                                                   |             |      |                       |             |            |            |                  |  |                       |          |            |            |  |                  |             |                       |    |     |            |    |    |            |  |                       |            |            |            |  |            |               |                       |    |     |            |    |    |
| Inadequate employment                                | (18.6%) 86                                                              |                                                                                             |                                                                                                                                                                                                                                                                                                                                                                                                                                                                                                                                                                                                                                                                                                                                                                                                                                                                                                                                                                                                                                                                                                                                                                                                                                                                                                                                                                                                                                                                                                                                                                                                                    |                                                                                                                                                                                                         |     |        |            |                    |           |     |     |                 |       |                                 |                                      |                        |                                     |                      |                         |                     |                        |                     |                        |                                                                                                                                                                                                                                                                                                                                                                            |     |         |            |                         |           |         |  |                 |      |      |      |            |         |      |      |            |          |      |      |                                                                                                                                                                                                                                                                                                                                                                                                                                                                                                                                                                                                                                                                                                                                                                                                                                                                                                                                                                                                                                                                                                                                                                                                                                                                                                                                                                                                                                                                                                                                                                                                                                                                                                                                                                                                                                                                                                                                                                                                                   |             |      |                       |             |            |            |                  |  |                       |          |            |            |  |                  |             |                       |    |     |            |    |    |            |  |                       |            |            |            |  |            |               |                       |    |     |            |    |    |
| Unemployed                                           | (23.9%) 29                                                              |                                                                                             |                                                                                                                                                                                                                                                                                                                                                                                                                                                                                                                                                                                                                                                                                                                                                                                                                                                                                                                                                                                                                                                                                                                                                                                                                                                                                                                                                                                                                                                                                                                                                                                                                    |                                                                                                                                                                                                         |     |        |            |                    |           |     |     |                 |       |                                 |                                      |                        |                                     |                      |                         |                     |                        |                     |                        |                                                                                                                                                                                                                                                                                                                                                                            |     |         |            |                         |           |         |  |                 |      |      |      |            |         |      |      |            |          |      |      |                                                                                                                                                                                                                                                                                                                                                                                                                                                                                                                                                                                                                                                                                                                                                                                                                                                                                                                                                                                                                                                                                                                                                                                                                                                                                                                                                                                                                                                                                                                                                                                                                                                                                                                                                                                                                                                                                                                                                                                                                   |             |      |                       |             |            |            |                  |  |                       |          |            |            |  |                  |             |                       |    |     |            |    |    |            |  |                       |            |            |            |  |            |               |                       |    |     |            |    |    |
|                                                      | Depression                                                              | No depression                                                                               |                                                                                                                                                                                                                                                                                                                                                                                                                                                                                                                                                                                                                                                                                                                                                                                                                                                                                                                                                                                                                                                                                                                                                                                                                                                                                                                                                                                                                                                                                                                                                                                                                    |                                                                                                                                                                                                         |     |        |            |                    |           |     |     |                 |       |                                 |                                      |                        |                                     |                      |                         |                     |                        |                     |                        |                                                                                                                                                                                                                                                                                                                                                                            |     |         |            |                         |           |         |  |                 |      |      |      |            |         |      |      |            |          |      |      |                                                                                                                                                                                                                                                                                                                                                                                                                                                                                                                                                                                                                                                                                                                                                                                                                                                                                                                                                                                                                                                                                                                                                                                                                                                                                                                                                                                                                                                                                                                                                                                                                                                                                                                                                                                                                                                                                                                                                                                                                   |             |      |                       |             |            |            |                  |  |                       |          |            |            |  |                  |             |                       |    |     |            |    |    |            |  |                       |            |            |            |  |            |               |                       |    |     |            |    |    |
| Inadequate employment                                | 86                                                                      | 378                                                                                         |                                                                                                                                                                                                                                                                                                                                                                                                                                                                                                                                                                                                                                                                                                                                                                                                                                                                                                                                                                                                                                                                                                                                                                                                                                                                                                                                                                                                                                                                                                                                                                                                                    |                                                                                                                                                                                                         |     |        |            |                    |           |     |     |                 |       |                                 |                                      |                        |                                     |                      |                         |                     |                        |                     |                        |                                                                                                                                                                                                                                                                                                                                                                            |     |         |            |                         |           |         |  |                 |      |      |      |            |         |      |      |            |          |      |      |                                                                                                                                                                                                                                                                                                                                                                                                                                                                                                                                                                                                                                                                                                                                                                                                                                                                                                                                                                                                                                                                                                                                                                                                                                                                                                                                                                                                                                                                                                                                                                                                                                                                                                                                                                                                                                                                                                                                                                                                                   |             |      |                       |             |            |            |                  |  |                       |          |            |            |  |                  |             |                       |    |     |            |    |    |            |  |                       |            |            |            |  |            |               |                       |    |     |            |    |    |
| Unemployed                                           | 29                                                                      | 94                                                                                          |                                                                                                                                                                                                                                                                                                                                                                                                                                                                                                                                                                                                                                                                                                                                                                                                                                                                                                                                                                                                                                                                                                                                                                                                                                                                                                                                                                                                                                                                                                                                                                                                                    |                                                                                                                                                                                                         |     |        |            |                    |           |     |     |                 |       |                                 |                                      |                        |                                     |                      |                         |                     |                        |                     |                        |                                                                                                                                                                                                                                                                                                                                                                            |     |         |            |                         |           |         |  |                 |      |      |      |            |         |      |      |            |          |      |      |                                                                                                                                                                                                                                                                                                                                                                                                                                                                                                                                                                                                                                                                                                                                                                                                                                                                                                                                                                                                                                                                                                                                                                                                                                                                                                                                                                                                                                                                                                                                                                                                                                                                                                                                                                                                                                                                                                                                                                                                                   |             |      |                       |             |            |            |                  |  |                       |          |            |            |  |                  |             |                       |    |     |            |    |    |            |  |                       |            |            |            |  |            |               |                       |    |     |            |    |    |
| Guseva Canu et al. 2019<br><br>Cohort                | Swiss census data 1990 to 2004<br><br>18 to 65 years                    | Occupational status lowest skilled and unskilled employees<br><br>Suicide                   | <p>Mortality from suicide in Swiss working-age population (1990-2014) by selected socio-economic factors and by sex: Swiss National Cohort (1990-2014) (table 2)</p> <table border="1"> <thead> <tr> <th></th> <th colspan="2">Men</th> <th colspan="2">Women</th> </tr> <tr> <th></th> <th>SMR</th> <th>DSR</th> <th>SMR</th> <th>DSR</th> </tr> </thead> <tbody> <tr> <td>Unskilled employees and workers</td> <td>0.90 (0.85 to 0.95)<br/>(1450 deaths)</td> <td>26.25 (24.73 to 27.77)</td> <td>0.88 (0.81 to 0.96)<br/>(559 deaths)</td> <td>9.57 (8.59 to 10.56)</td> </tr> <tr> <td>Unemployed /job seeking</td> <td>1.95 (1.80 to 2.12)</td> <td>52.94 (46.32 to 59.56)</td> <td>2.11 (1.87 to 2.37)</td> <td>21.84 (16.85 to 26.84)</td> </tr> </tbody> </table>                                                                                                                                                                                                                                                                                                                                                                                                                                                                                                                                                                                                                                                                                                                                                                                                                                          |                                                                                                                                                                                                         | Men |        | Women      |                    |           | SMR | DSR | SMR             | DSR   | Unskilled employees and workers | 0.90 (0.85 to 0.95)<br>(1450 deaths) | 26.25 (24.73 to 27.77) | 0.88 (0.81 to 0.96)<br>(559 deaths) | 9.57 (8.59 to 10.56) | Unemployed /job seeking | 1.95 (1.80 to 2.12) | 52.94 (46.32 to 59.56) | 2.11 (1.87 to 2.37) | 21.84 (16.85 to 26.84) | <p>Yes: Unskilled employees and workers were at significantly lower risk of dying by suicide than those who were unemployed.</p> <p>Data from table 1, page 1486</p> <table border="1"> <thead> <tr> <th>Men</th> <th>Suicide</th> <th>No suicide</th> </tr> </thead> <tbody> <tr> <td>Unskilled employees and</td> <td>1450</td> <td>281,718</td> </tr> </tbody> </table> | Men | Suicide | No suicide | Unskilled employees and | 1450      | 281,718 |  |                 |      |      |      |            |         |      |      |            |          |      |      |                                                                                                                                                                                                                                                                                                                                                                                                                                                                                                                                                                                                                                                                                                                                                                                                                                                                                                                                                                                                                                                                                                                                                                                                                                                                                                                                                                                                                                                                                                                                                                                                                                                                                                                                                                                                                                                                                                                                                                                                                   |             |      |                       |             |            |            |                  |  |                       |          |            |            |  |                  |             |                       |    |     |            |    |    |            |  |                       |            |            |            |  |            |               |                       |    |     |            |    |    |
|                                                      | Men                                                                     |                                                                                             | Women                                                                                                                                                                                                                                                                                                                                                                                                                                                                                                                                                                                                                                                                                                                                                                                                                                                                                                                                                                                                                                                                                                                                                                                                                                                                                                                                                                                                                                                                                                                                                                                                              |                                                                                                                                                                                                         |     |        |            |                    |           |     |     |                 |       |                                 |                                      |                        |                                     |                      |                         |                     |                        |                     |                        |                                                                                                                                                                                                                                                                                                                                                                            |     |         |            |                         |           |         |  |                 |      |      |      |            |         |      |      |            |          |      |      |                                                                                                                                                                                                                                                                                                                                                                                                                                                                                                                                                                                                                                                                                                                                                                                                                                                                                                                                                                                                                                                                                                                                                                                                                                                                                                                                                                                                                                                                                                                                                                                                                                                                                                                                                                                                                                                                                                                                                                                                                   |             |      |                       |             |            |            |                  |  |                       |          |            |            |  |                  |             |                       |    |     |            |    |    |            |  |                       |            |            |            |  |            |               |                       |    |     |            |    |    |
|                                                      | SMR                                                                     | DSR                                                                                         | SMR                                                                                                                                                                                                                                                                                                                                                                                                                                                                                                                                                                                                                                                                                                                                                                                                                                                                                                                                                                                                                                                                                                                                                                                                                                                                                                                                                                                                                                                                                                                                                                                                                | DSR                                                                                                                                                                                                     |     |        |            |                    |           |     |     |                 |       |                                 |                                      |                        |                                     |                      |                         |                     |                        |                     |                        |                                                                                                                                                                                                                                                                                                                                                                            |     |         |            |                         |           |         |  |                 |      |      |      |            |         |      |      |            |          |      |      |                                                                                                                                                                                                                                                                                                                                                                                                                                                                                                                                                                                                                                                                                                                                                                                                                                                                                                                                                                                                                                                                                                                                                                                                                                                                                                                                                                                                                                                                                                                                                                                                                                                                                                                                                                                                                                                                                                                                                                                                                   |             |      |                       |             |            |            |                  |  |                       |          |            |            |  |                  |             |                       |    |     |            |    |    |            |  |                       |            |            |            |  |            |               |                       |    |     |            |    |    |
| Unskilled employees and workers                      | 0.90 (0.85 to 0.95)<br>(1450 deaths)                                    | 26.25 (24.73 to 27.77)                                                                      | 0.88 (0.81 to 0.96)<br>(559 deaths)                                                                                                                                                                                                                                                                                                                                                                                                                                                                                                                                                                                                                                                                                                                                                                                                                                                                                                                                                                                                                                                                                                                                                                                                                                                                                                                                                                                                                                                                                                                                                                                | 9.57 (8.59 to 10.56)                                                                                                                                                                                    |     |        |            |                    |           |     |     |                 |       |                                 |                                      |                        |                                     |                      |                         |                     |                        |                     |                        |                                                                                                                                                                                                                                                                                                                                                                            |     |         |            |                         |           |         |  |                 |      |      |      |            |         |      |      |            |          |      |      |                                                                                                                                                                                                                                                                                                                                                                                                                                                                                                                                                                                                                                                                                                                                                                                                                                                                                                                                                                                                                                                                                                                                                                                                                                                                                                                                                                                                                                                                                                                                                                                                                                                                                                                                                                                                                                                                                                                                                                                                                   |             |      |                       |             |            |            |                  |  |                       |          |            |            |  |                  |             |                       |    |     |            |    |    |            |  |                       |            |            |            |  |            |               |                       |    |     |            |    |    |
| Unemployed /job seeking                              | 1.95 (1.80 to 2.12)                                                     | 52.94 (46.32 to 59.56)                                                                      | 2.11 (1.87 to 2.37)                                                                                                                                                                                                                                                                                                                                                                                                                                                                                                                                                                                                                                                                                                                                                                                                                                                                                                                                                                                                                                                                                                                                                                                                                                                                                                                                                                                                                                                                                                                                                                                                | 21.84 (16.85 to 26.84)                                                                                                                                                                                  |     |        |            |                    |           |     |     |                 |       |                                 |                                      |                        |                                     |                      |                         |                     |                        |                     |                        |                                                                                                                                                                                                                                                                                                                                                                            |     |         |            |                         |           |         |  |                 |      |      |      |            |         |      |      |            |          |      |      |                                                                                                                                                                                                                                                                                                                                                                                                                                                                                                                                                                                                                                                                                                                                                                                                                                                                                                                                                                                                                                                                                                                                                                                                                                                                                                                                                                                                                                                                                                                                                                                                                                                                                                                                                                                                                                                                                                                                                                                                                   |             |      |                       |             |            |            |                  |  |                       |          |            |            |  |                  |             |                       |    |     |            |    |    |            |  |                       |            |            |            |  |            |               |                       |    |     |            |    |    |
| Men                                                  | Suicide                                                                 | No suicide                                                                                  |                                                                                                                                                                                                                                                                                                                                                                                                                                                                                                                                                                                                                                                                                                                                                                                                                                                                                                                                                                                                                                                                                                                                                                                                                                                                                                                                                                                                                                                                                                                                                                                                                    |                                                                                                                                                                                                         |     |        |            |                    |           |     |     |                 |       |                                 |                                      |                        |                                     |                      |                         |                     |                        |                     |                        |                                                                                                                                                                                                                                                                                                                                                                            |     |         |            |                         |           |         |  |                 |      |      |      |            |         |      |      |            |          |      |      |                                                                                                                                                                                                                                                                                                                                                                                                                                                                                                                                                                                                                                                                                                                                                                                                                                                                                                                                                                                                                                                                                                                                                                                                                                                                                                                                                                                                                                                                                                                                                                                                                                                                                                                                                                                                                                                                                                                                                                                                                   |             |      |                       |             |            |            |                  |  |                       |          |            |            |  |                  |             |                       |    |     |            |    |    |            |  |                       |            |            |            |  |            |               |                       |    |     |            |    |    |
| Unskilled employees and                              | 1450                                                                    | 281,718                                                                                     |                                                                                                                                                                                                                                                                                                                                                                                                                                                                                                                                                                                                                                                                                                                                                                                                                                                                                                                                                                                                                                                                                                                                                                                                                                                                                                                                                                                                                                                                                                                                                                                                                    |                                                                                                                                                                                                         |     |        |            |                    |           |     |     |                 |       |                                 |                                      |                        |                                     |                      |                         |                     |                        |                     |                        |                                                                                                                                                                                                                                                                                                                                                                            |     |         |            |                         |           |         |  |                 |      |      |      |            |         |      |      |            |          |      |      |                                                                                                                                                                                                                                                                                                                                                                                                                                                                                                                                                                                                                                                                                                                                                                                                                                                                                                                                                                                                                                                                                                                                                                                                                                                                                                                                                                                                                                                                                                                                                                                                                                                                                                                                                                                                                                                                                                                                                                                                                   |             |      |                       |             |            |            |                  |  |                       |          |            |            |  |                  |             |                       |    |     |            |    |    |            |  |                       |            |            |            |  |            |               |                       |    |     |            |    |    |

| Reference/<br>Study design                                    | Data source/<br>Population<br>range                                                 | Poor/bad job<br>definition<br>Outcome                                          | Results from paper                                                                                                                                                                                                                                                                                                                                                                                                                                                                                                                                                                                                                                                                                                                                                                                                                                                                                                                                                                                                                                                                                                                                                                                                     | Is any job better than no job?<br>Where OR has been calculated by OES exposure is bad/poor<br>job, is unadjusted and data used to calculate may have<br>been derived from percentages in study results tables                                                                                                                                                                                                                                                                                                                                                                                                  |                                                    |                                              |                                          |                                         |                  |                                 |                                   |                                   |            |                                                      |                                   |                                                                                                                                                                                                                                                                                                                                                                                                                                                                                                                                                                                                                                                                                                                             |                                         |            |            |                   |             |           |                     |             |             |       |                     |             |
|---------------------------------------------------------------|-------------------------------------------------------------------------------------|--------------------------------------------------------------------------------|------------------------------------------------------------------------------------------------------------------------------------------------------------------------------------------------------------------------------------------------------------------------------------------------------------------------------------------------------------------------------------------------------------------------------------------------------------------------------------------------------------------------------------------------------------------------------------------------------------------------------------------------------------------------------------------------------------------------------------------------------------------------------------------------------------------------------------------------------------------------------------------------------------------------------------------------------------------------------------------------------------------------------------------------------------------------------------------------------------------------------------------------------------------------------------------------------------------------|----------------------------------------------------------------------------------------------------------------------------------------------------------------------------------------------------------------------------------------------------------------------------------------------------------------------------------------------------------------------------------------------------------------------------------------------------------------------------------------------------------------------------------------------------------------------------------------------------------------|----------------------------------------------------|----------------------------------------------|------------------------------------------|-----------------------------------------|------------------|---------------------------------|-----------------------------------|-----------------------------------|------------|------------------------------------------------------|-----------------------------------|-----------------------------------------------------------------------------------------------------------------------------------------------------------------------------------------------------------------------------------------------------------------------------------------------------------------------------------------------------------------------------------------------------------------------------------------------------------------------------------------------------------------------------------------------------------------------------------------------------------------------------------------------------------------------------------------------------------------------------|-----------------------------------------|------------|------------|-------------------|-------------|-----------|---------------------|-------------|-------------|-------|---------------------|-------------|
|                                                               |                                                                                     |                                                                                | (568 deaths) (281 deaths)                                                                                                                                                                                                                                                                                                                                                                                                                                                                                                                                                                                                                                                                                                                                                                                                                                                                                                                                                                                                                                                                                                                                                                                              | <table border="1"> <tr> <td>workers<br/>(n=283,168)</td> <td></td> <td></td> </tr> <tr> <td>Unemployed/job<br/>seeking<br/>(n=77,181)</td> <td>568</td> <td>76,613</td> </tr> </table> <p>Relative risk 0.69, 95% CI 0.63 to 0.77, p&lt;0.0001</p> <table border="1"> <tr> <td>Women</td> <td>Suicide</td> <td>No suicide</td> </tr> <tr> <td>Unskilled<br/>employees and<br/>workers<br/>(n=264,046)</td> <td>559</td> <td>263,487</td> </tr> <tr> <td>Unemployed/job<br/>seeking<br/>(n=90,812)</td> <td>281</td> <td>90,531</td> </tr> </table> <p>Relative risk 0.68, 95% CI 0.59 to 0.79, p&lt;0.0001</p> | workers<br>(n=283,168)                             |                                              |                                          | Unemployed/job<br>seeking<br>(n=77,181) | 568              | 76,613                          | Women                             | Suicide                           | No suicide | Unskilled<br>employees and<br>workers<br>(n=264,046) | 559                               | 263,487                                                                                                                                                                                                                                                                                                                                                                                                                                                                                                                                                                                                                                                                                                                     | Unemployed/job<br>seeking<br>(n=90,812) | 281        | 90,531     |                   |             |           |                     |             |             |       |                     |             |
| workers<br>(n=283,168)                                        |                                                                                     |                                                                                |                                                                                                                                                                                                                                                                                                                                                                                                                                                                                                                                                                                                                                                                                                                                                                                                                                                                                                                                                                                                                                                                                                                                                                                                                        |                                                                                                                                                                                                                                                                                                                                                                                                                                                                                                                                                                                                                |                                                    |                                              |                                          |                                         |                  |                                 |                                   |                                   |            |                                                      |                                   |                                                                                                                                                                                                                                                                                                                                                                                                                                                                                                                                                                                                                                                                                                                             |                                         |            |            |                   |             |           |                     |             |             |       |                     |             |
| Unemployed/job<br>seeking<br>(n=77,181)                       | 568                                                                                 | 76,613                                                                         |                                                                                                                                                                                                                                                                                                                                                                                                                                                                                                                                                                                                                                                                                                                                                                                                                                                                                                                                                                                                                                                                                                                                                                                                                        |                                                                                                                                                                                                                                                                                                                                                                                                                                                                                                                                                                                                                |                                                    |                                              |                                          |                                         |                  |                                 |                                   |                                   |            |                                                      |                                   |                                                                                                                                                                                                                                                                                                                                                                                                                                                                                                                                                                                                                                                                                                                             |                                         |            |            |                   |             |           |                     |             |             |       |                     |             |
| Women                                                         | Suicide                                                                             | No suicide                                                                     |                                                                                                                                                                                                                                                                                                                                                                                                                                                                                                                                                                                                                                                                                                                                                                                                                                                                                                                                                                                                                                                                                                                                                                                                                        |                                                                                                                                                                                                                                                                                                                                                                                                                                                                                                                                                                                                                |                                                    |                                              |                                          |                                         |                  |                                 |                                   |                                   |            |                                                      |                                   |                                                                                                                                                                                                                                                                                                                                                                                                                                                                                                                                                                                                                                                                                                                             |                                         |            |            |                   |             |           |                     |             |             |       |                     |             |
| Unskilled<br>employees and<br>workers<br>(n=264,046)          | 559                                                                                 | 263,487                                                                        |                                                                                                                                                                                                                                                                                                                                                                                                                                                                                                                                                                                                                                                                                                                                                                                                                                                                                                                                                                                                                                                                                                                                                                                                                        |                                                                                                                                                                                                                                                                                                                                                                                                                                                                                                                                                                                                                |                                                    |                                              |                                          |                                         |                  |                                 |                                   |                                   |            |                                                      |                                   |                                                                                                                                                                                                                                                                                                                                                                                                                                                                                                                                                                                                                                                                                                                             |                                         |            |            |                   |             |           |                     |             |             |       |                     |             |
| Unemployed/job<br>seeking<br>(n=90,812)                       | 281                                                                                 | 90,531                                                                         |                                                                                                                                                                                                                                                                                                                                                                                                                                                                                                                                                                                                                                                                                                                                                                                                                                                                                                                                                                                                                                                                                                                                                                                                                        |                                                                                                                                                                                                                                                                                                                                                                                                                                                                                                                                                                                                                |                                                    |                                              |                                          |                                         |                  |                                 |                                   |                                   |            |                                                      |                                   |                                                                                                                                                                                                                                                                                                                                                                                                                                                                                                                                                                                                                                                                                                                             |                                         |            |            |                   |             |           |                     |             |             |       |                     |             |
| Inanc H 2018<br>(see also Inanc H<br>2016)<br>Cross sectional | British Household<br>Panel Survey, 8<br>waves 1991<br>onwards<br><br>20 to 65 years | Insecure employment<br><br>Psychological<br>wellbeing and life<br>satisfaction | <p>Wives subjective wellbeing as a function of husbands' labour market insecurity, fixed effects regressions. Coefficients and assume standard error – tables in paper not labelled</p> <table border="1"> <tr> <td>Husband<br/>Temporary vs unemployed</td> <td>Psychological wellbeing (n=7420)<br/>-0.006 (0.005)</td> <td>Life satisfaction (n=6486)<br/>-0.002 (0.007)</td> </tr> <tr> <td>Self</td> <td>0.043 (0.005)***</td> <td>0.026 (0.008)***</td> </tr> </table> <p>Reference is unemployed<br/>***p&lt;0.001</p> <p>Husbands' subjective well-being as a function of wives labour market insecurity. Fixed effects regressions. Coefficients and assume standard error – tables in paper not labelled</p> <table border="1"> <tr> <td>Wife<br/>Temporary vs unemployed</td> <td>(n=7175)<br/>-0.010 (0.005)**</td> <td>(n=6240)<br/>-0.009 (0.007)</td> </tr> <tr> <td>Self</td> <td>0.047 (0.004)***</td> <td>0.030 (0.007)***</td> </tr> </table> <p>**p&lt;0.01 ***p&lt;0.001</p> <p>Adjusted for partners respective wellbeing and life satisfaction, regional unemployment rate, current duration of partnership, number and presence of children, married or cohabiting, age, year of interview</p> | Husband<br>Temporary vs unemployed                                                                                                                                                                                                                                                                                                                                                                                                                                                                                                                                                                             | Psychological wellbeing (n=7420)<br>-0.006 (0.005) | Life satisfaction (n=6486)<br>-0.002 (0.007) | Self                                     | 0.043 (0.005)***                        | 0.026 (0.008)*** | Wife<br>Temporary vs unemployed | (n=7175)<br>-0.010 (0.005)**      | (n=6240)<br>-0.009 (0.007)        | Self       | 0.047 (0.004)***                                     | 0.030 (0.007)***                  | <p>No: A husbands temporary employment had a greater negative effect on their wife's psychological wellbeing and life satisfaction than if he were unemployed.</p> <p>Yes: However, a husband's own psychological wellbeing and life satisfaction was significantly greater when they were in temporary employment, compared to being unemployed.</p> <p>No: A wife's temporary employment had a significantly greater negative effect on their husband's psychological wellbeing and but not on their life satisfaction than if she were unemployed.</p> <p>Yes: However, a wife's own psychological wellbeing and life satisfaction was greater when they were in temporary employment, compared to being unemployed.</p> |                                         |            |            |                   |             |           |                     |             |             |       |                     |             |
| Husband<br>Temporary vs unemployed                            | Psychological wellbeing (n=7420)<br>-0.006 (0.005)                                  | Life satisfaction (n=6486)<br>-0.002 (0.007)                                   |                                                                                                                                                                                                                                                                                                                                                                                                                                                                                                                                                                                                                                                                                                                                                                                                                                                                                                                                                                                                                                                                                                                                                                                                                        |                                                                                                                                                                                                                                                                                                                                                                                                                                                                                                                                                                                                                |                                                    |                                              |                                          |                                         |                  |                                 |                                   |                                   |            |                                                      |                                   |                                                                                                                                                                                                                                                                                                                                                                                                                                                                                                                                                                                                                                                                                                                             |                                         |            |            |                   |             |           |                     |             |             |       |                     |             |
| Self                                                          | 0.043 (0.005)***                                                                    | 0.026 (0.008)***                                                               |                                                                                                                                                                                                                                                                                                                                                                                                                                                                                                                                                                                                                                                                                                                                                                                                                                                                                                                                                                                                                                                                                                                                                                                                                        |                                                                                                                                                                                                                                                                                                                                                                                                                                                                                                                                                                                                                |                                                    |                                              |                                          |                                         |                  |                                 |                                   |                                   |            |                                                      |                                   |                                                                                                                                                                                                                                                                                                                                                                                                                                                                                                                                                                                                                                                                                                                             |                                         |            |            |                   |             |           |                     |             |             |       |                     |             |
| Wife<br>Temporary vs unemployed                               | (n=7175)<br>-0.010 (0.005)**                                                        | (n=6240)<br>-0.009 (0.007)                                                     |                                                                                                                                                                                                                                                                                                                                                                                                                                                                                                                                                                                                                                                                                                                                                                                                                                                                                                                                                                                                                                                                                                                                                                                                                        |                                                                                                                                                                                                                                                                                                                                                                                                                                                                                                                                                                                                                |                                                    |                                              |                                          |                                         |                  |                                 |                                   |                                   |            |                                                      |                                   |                                                                                                                                                                                                                                                                                                                                                                                                                                                                                                                                                                                                                                                                                                                             |                                         |            |            |                   |             |           |                     |             |             |       |                     |             |
| Self                                                          | 0.047 (0.004)***                                                                    | 0.030 (0.007)***                                                               |                                                                                                                                                                                                                                                                                                                                                                                                                                                                                                                                                                                                                                                                                                                                                                                                                                                                                                                                                                                                                                                                                                                                                                                                                        |                                                                                                                                                                                                                                                                                                                                                                                                                                                                                                                                                                                                                |                                                    |                                              |                                          |                                         |                  |                                 |                                   |                                   |            |                                                      |                                   |                                                                                                                                                                                                                                                                                                                                                                                                                                                                                                                                                                                                                                                                                                                             |                                         |            |            |                   |             |           |                     |             |             |       |                     |             |
| Jang et al. 2015<br><br>Cohort                                | Korean Welfare<br>Panel Study 2007<br>to 2013<br><br>19 to 65 years                 | Insecure employment<br><br>Severe depressive<br>symptoms                       | <p>Generalised estimating equation analysing the effect of yearly employment status on new-onset of severe depressive symptoms during the 6-year follow-up period, among individuals who were waged workers at baseline in 2007. Odds ratios and 95% confidence intervals. Reference is full time permanent (table 2, page 334)</p> <table border="1"> <tr> <td></td> <td>Males</td> <td>Females</td> </tr> <tr> <td>Employment status<br/>each year from 2008</td> <td></td> <td></td> </tr> <tr> <td>Unemployed</td> <td>2.90 (1.85 to 4.57)<br/>(33 cases)</td> <td>1.85 (1.17 to 2.90)<br/>(46 cases)</td> </tr> <tr> <td>Precarious</td> <td>1.59 (1.10 to 2.30)<br/>(63 cases)</td> <td>1.41 (0.94 to 2.12)<br/>(70 cases)</td> </tr> </table>                                                                                                                                                                                                                                                                                                                                                                                                                                                                   |                                                                                                                                                                                                                                                                                                                                                                                                                                                                                                                                                                                                                | Males                                              | Females                                      | Employment status<br>each year from 2008 |                                         |                  | Unemployed                      | 2.90 (1.85 to 4.57)<br>(33 cases) | 1.85 (1.17 to 2.90)<br>(46 cases) | Precarious | 1.59 (1.10 to 2.30)<br>(63 cases)                    | 1.41 (0.94 to 2.12)<br>(70 cases) | <p>Yes: in workers who were employed at baseline, those who moved into precarious employment were at significantly lower risk of developing severe depressive symptoms than those who became unemployed.<br/>From table 1, page 333</p> <table border="1"> <tr> <td></td> <td>Precarious</td> <td>Unemployed</td> </tr> <tr> <td>Males<br/>(n=2214)</td> <td>(18.7%) 414</td> <td>(3.3%) 73</td> </tr> <tr> <td>Females<br/>(n=1276)</td> <td>(28.5%) 364</td> <td>(13.1%) 167</td> </tr> </table> <p>Table 2 for number of cases with depressive symptoms</p> <table border="1"> <tr> <td>Males</td> <td>Depressive symptoms</td> <td>No symptoms</td> </tr> </table>                                                      |                                         | Precarious | Unemployed | Males<br>(n=2214) | (18.7%) 414 | (3.3%) 73 | Females<br>(n=1276) | (28.5%) 364 | (13.1%) 167 | Males | Depressive symptoms | No symptoms |
|                                                               | Males                                                                               | Females                                                                        |                                                                                                                                                                                                                                                                                                                                                                                                                                                                                                                                                                                                                                                                                                                                                                                                                                                                                                                                                                                                                                                                                                                                                                                                                        |                                                                                                                                                                                                                                                                                                                                                                                                                                                                                                                                                                                                                |                                                    |                                              |                                          |                                         |                  |                                 |                                   |                                   |            |                                                      |                                   |                                                                                                                                                                                                                                                                                                                                                                                                                                                                                                                                                                                                                                                                                                                             |                                         |            |            |                   |             |           |                     |             |             |       |                     |             |
| Employment status<br>each year from 2008                      |                                                                                     |                                                                                |                                                                                                                                                                                                                                                                                                                                                                                                                                                                                                                                                                                                                                                                                                                                                                                                                                                                                                                                                                                                                                                                                                                                                                                                                        |                                                                                                                                                                                                                                                                                                                                                                                                                                                                                                                                                                                                                |                                                    |                                              |                                          |                                         |                  |                                 |                                   |                                   |            |                                                      |                                   |                                                                                                                                                                                                                                                                                                                                                                                                                                                                                                                                                                                                                                                                                                                             |                                         |            |            |                   |             |           |                     |             |             |       |                     |             |
| Unemployed                                                    | 2.90 (1.85 to 4.57)<br>(33 cases)                                                   | 1.85 (1.17 to 2.90)<br>(46 cases)                                              |                                                                                                                                                                                                                                                                                                                                                                                                                                                                                                                                                                                                                                                                                                                                                                                                                                                                                                                                                                                                                                                                                                                                                                                                                        |                                                                                                                                                                                                                                                                                                                                                                                                                                                                                                                                                                                                                |                                                    |                                              |                                          |                                         |                  |                                 |                                   |                                   |            |                                                      |                                   |                                                                                                                                                                                                                                                                                                                                                                                                                                                                                                                                                                                                                                                                                                                             |                                         |            |            |                   |             |           |                     |             |             |       |                     |             |
| Precarious                                                    | 1.59 (1.10 to 2.30)<br>(63 cases)                                                   | 1.41 (0.94 to 2.12)<br>(70 cases)                                              |                                                                                                                                                                                                                                                                                                                                                                                                                                                                                                                                                                                                                                                                                                                                                                                                                                                                                                                                                                                                                                                                                                                                                                                                                        |                                                                                                                                                                                                                                                                                                                                                                                                                                                                                                                                                                                                                |                                                    |                                              |                                          |                                         |                  |                                 |                                   |                                   |            |                                                      |                                   |                                                                                                                                                                                                                                                                                                                                                                                                                                                                                                                                                                                                                                                                                                                             |                                         |            |            |                   |             |           |                     |             |             |       |                     |             |
|                                                               | Precarious                                                                          | Unemployed                                                                     |                                                                                                                                                                                                                                                                                                                                                                                                                                                                                                                                                                                                                                                                                                                                                                                                                                                                                                                                                                                                                                                                                                                                                                                                                        |                                                                                                                                                                                                                                                                                                                                                                                                                                                                                                                                                                                                                |                                                    |                                              |                                          |                                         |                  |                                 |                                   |                                   |            |                                                      |                                   |                                                                                                                                                                                                                                                                                                                                                                                                                                                                                                                                                                                                                                                                                                                             |                                         |            |            |                   |             |           |                     |             |             |       |                     |             |
| Males<br>(n=2214)                                             | (18.7%) 414                                                                         | (3.3%) 73                                                                      |                                                                                                                                                                                                                                                                                                                                                                                                                                                                                                                                                                                                                                                                                                                                                                                                                                                                                                                                                                                                                                                                                                                                                                                                                        |                                                                                                                                                                                                                                                                                                                                                                                                                                                                                                                                                                                                                |                                                    |                                              |                                          |                                         |                  |                                 |                                   |                                   |            |                                                      |                                   |                                                                                                                                                                                                                                                                                                                                                                                                                                                                                                                                                                                                                                                                                                                             |                                         |            |            |                   |             |           |                     |             |             |       |                     |             |
| Females<br>(n=1276)                                           | (28.5%) 364                                                                         | (13.1%) 167                                                                    |                                                                                                                                                                                                                                                                                                                                                                                                                                                                                                                                                                                                                                                                                                                                                                                                                                                                                                                                                                                                                                                                                                                                                                                                                        |                                                                                                                                                                                                                                                                                                                                                                                                                                                                                                                                                                                                                |                                                    |                                              |                                          |                                         |                  |                                 |                                   |                                   |            |                                                      |                                   |                                                                                                                                                                                                                                                                                                                                                                                                                                                                                                                                                                                                                                                                                                                             |                                         |            |            |                   |             |           |                     |             |             |       |                     |             |
| Males                                                         | Depressive symptoms                                                                 | No symptoms                                                                    |                                                                                                                                                                                                                                                                                                                                                                                                                                                                                                                                                                                                                                                                                                                                                                                                                                                                                                                                                                                                                                                                                                                                                                                                                        |                                                                                                                                                                                                                                                                                                                                                                                                                                                                                                                                                                                                                |                                                    |                                              |                                          |                                         |                  |                                 |                                   |                                   |            |                                                      |                                   |                                                                                                                                                                                                                                                                                                                                                                                                                                                                                                                                                                                                                                                                                                                             |                                         |            |            |                   |             |           |                     |             |             |       |                     |             |

| Reference/<br>Study design                                                     | Data source/<br>Population<br>range                               | Poor/bad job<br>definition<br>Outcome                      | Results from paper                                                                                                                                                                                                                                                                                                                                                                                                                                                                                                                                                                                                                                                                                                                                                                                                                                                                                                                                                                                                                                                                                                                                                                                                                                                                                                                                                                                                                                                                                                                                                                                                                                                                                                                                                                                                                                                                                                                                                                                                                                                                                                                                                                                                                              | Is any job better than no job?<br>Where OR has been calculated by OES exposure is bad/poor job, is unadjusted and data used to calculate may have been derived from percentages in study results tables |                   |                     |                       |           |       |            |                     |                     |            |                                   |                       |                                                                                                                                                                                                                                                       |                     |                     |                                   |                      |                                   |                     |                                                                                                                                                                                                                                                                                                                                                                                                                                                                                                                                             |                     |    |                |                |                    |     |         |                     |                     |                           |                      |                      |                       |                      |     |  |                     |  |  |                      |                     |                     |                     |                     |                            |                      |                    |                             |                                                                                                                                                                                                                                                                                                                                                                                                                                                                                                                                                                                                                                                                                                                                                                                                                                                       |
|--------------------------------------------------------------------------------|-------------------------------------------------------------------|------------------------------------------------------------|-------------------------------------------------------------------------------------------------------------------------------------------------------------------------------------------------------------------------------------------------------------------------------------------------------------------------------------------------------------------------------------------------------------------------------------------------------------------------------------------------------------------------------------------------------------------------------------------------------------------------------------------------------------------------------------------------------------------------------------------------------------------------------------------------------------------------------------------------------------------------------------------------------------------------------------------------------------------------------------------------------------------------------------------------------------------------------------------------------------------------------------------------------------------------------------------------------------------------------------------------------------------------------------------------------------------------------------------------------------------------------------------------------------------------------------------------------------------------------------------------------------------------------------------------------------------------------------------------------------------------------------------------------------------------------------------------------------------------------------------------------------------------------------------------------------------------------------------------------------------------------------------------------------------------------------------------------------------------------------------------------------------------------------------------------------------------------------------------------------------------------------------------------------------------------------------------------------------------------------------------|---------------------------------------------------------------------------------------------------------------------------------------------------------------------------------------------------------|-------------------|---------------------|-----------------------|-----------|-------|------------|---------------------|---------------------|------------|-----------------------------------|-----------------------|-------------------------------------------------------------------------------------------------------------------------------------------------------------------------------------------------------------------------------------------------------|---------------------|---------------------|-----------------------------------|----------------------|-----------------------------------|---------------------|---------------------------------------------------------------------------------------------------------------------------------------------------------------------------------------------------------------------------------------------------------------------------------------------------------------------------------------------------------------------------------------------------------------------------------------------------------------------------------------------------------------------------------------------|---------------------|----|----------------|----------------|--------------------|-----|---------|---------------------|---------------------|---------------------------|----------------------|----------------------|-----------------------|----------------------|-----|--|---------------------|--|--|----------------------|---------------------|---------------------|---------------------|---------------------|----------------------------|----------------------|--------------------|-----------------------------|-------------------------------------------------------------------------------------------------------------------------------------------------------------------------------------------------------------------------------------------------------------------------------------------------------------------------------------------------------------------------------------------------------------------------------------------------------------------------------------------------------------------------------------------------------------------------------------------------------------------------------------------------------------------------------------------------------------------------------------------------------------------------------------------------------------------------------------------------------|
|                                                                                |                                                                   |                                                            | <p>Generalised estimating equation analysing the effect of yearly employment and new-onset of severe depressive symptoms during 6 year follow up period among individuals who were waged workers at baseline in 2007. Odds ratios and 95% confidence intervals. Reference is full time permanent</p> <table border="1"> <thead> <tr> <th rowspan="2">Employment status each year</th> <th colspan="2">Head of household</th> <th colspan="2">Non-head of household</th> </tr> <tr> <th>Males</th> <th>Females</th> <th>Males</th> <th>Females</th> </tr> </thead> <tbody> <tr> <td>Unemployed</td> <td>3.10 (1.88 to 5.13)<br/>(36 cases)</td> <td>6.10 (2.17 to 17.12)</td> <td>2.69 (0.93 to 7.76)<br/>(43 cases)</td> <td>1.31 (0.78 to 2.18)</td> </tr> <tr> <td>Precarious</td> <td>1.52 (1.02 to 2.25)<br/>(85 cases)</td> <td>4.19 (1.70 to 10.32)</td> <td>2.13 (0.71 to 6.34)<br/>(48 cases)</td> <td>1.03 (0.63 to 1.68)</td> </tr> </tbody> </table> <p>Adjusted for previous year's CES-D 11 score, age in years, equalized household income, education level, head of household status, marital status, residential area, occupation at baseline, company size at baseline, exposure to hazardous environment in workplace, chronic disease, perceived health status, smoking status, alcohol use, and observation year</p>                                                                                                                                                                                                                                                                                                                                                                                                                                                                                                                                                                                                                                                                                                                                                                                                                                                                                                        | Employment status each year                                                                                                                                                                             | Head of household |                     | Non-head of household |           | Males | Females    | Males               | Females             | Unemployed | 3.10 (1.88 to 5.13)<br>(36 cases) | 6.10 (2.17 to 17.12)  | 2.69 (0.93 to 7.76)<br>(43 cases)                                                                                                                                                                                                                     | 1.31 (0.78 to 2.18) | Precarious          | 1.52 (1.02 to 2.25)<br>(85 cases) | 4.19 (1.70 to 10.32) | 2.13 (0.71 to 6.34)<br>(48 cases) | 1.03 (0.63 to 1.68) | <table border="1"> <tbody> <tr> <td>Precarious</td> <td>63</td> <td>351</td> </tr> <tr> <td>Unemployed</td> <td>33</td> <td>40</td> </tr> </tbody> </table> <p>Relative risk 0.34, 95% CI 0.24 to 0.47, p&lt;0.001</p> <table border="1"> <thead> <tr> <th>Females</th> <th>Depressive symptoms</th> <th>No symptoms</th> </tr> </thead> <tbody> <tr> <td>Precarious</td> <td>70</td> <td>294</td> </tr> <tr> <td>Unemployed</td> <td>46</td> <td>121</td> </tr> </tbody> </table> <p>Relative risk 0.70, 95% CI 0.51 to 0.97, p=0.0296</p> | Precarious          | 63 | 351            | Unemployed     | 33                 | 40  | Females | Depressive symptoms | No symptoms         | Precarious                | 70                   | 294                  | Unemployed            | 46                   | 121 |  |                     |  |  |                      |                     |                     |                     |                     |                            |                      |                    |                             |                                                                                                                                                                                                                                                                                                                                                                                                                                                                                                                                                                                                                                                                                                                                                                                                                                                       |
| Employment status each year                                                    | Head of household                                                 |                                                            | Non-head of household                                                                                                                                                                                                                                                                                                                                                                                                                                                                                                                                                                                                                                                                                                                                                                                                                                                                                                                                                                                                                                                                                                                                                                                                                                                                                                                                                                                                                                                                                                                                                                                                                                                                                                                                                                                                                                                                                                                                                                                                                                                                                                                                                                                                                           |                                                                                                                                                                                                         |                   |                     |                       |           |       |            |                     |                     |            |                                   |                       |                                                                                                                                                                                                                                                       |                     |                     |                                   |                      |                                   |                     |                                                                                                                                                                                                                                                                                                                                                                                                                                                                                                                                             |                     |    |                |                |                    |     |         |                     |                     |                           |                      |                      |                       |                      |     |  |                     |  |  |                      |                     |                     |                     |                     |                            |                      |                    |                             |                                                                                                                                                                                                                                                                                                                                                                                                                                                                                                                                                                                                                                                                                                                                                                                                                                                       |
|                                                                                | Males                                                             | Females                                                    | Males                                                                                                                                                                                                                                                                                                                                                                                                                                                                                                                                                                                                                                                                                                                                                                                                                                                                                                                                                                                                                                                                                                                                                                                                                                                                                                                                                                                                                                                                                                                                                                                                                                                                                                                                                                                                                                                                                                                                                                                                                                                                                                                                                                                                                                           | Females                                                                                                                                                                                                 |                   |                     |                       |           |       |            |                     |                     |            |                                   |                       |                                                                                                                                                                                                                                                       |                     |                     |                                   |                      |                                   |                     |                                                                                                                                                                                                                                                                                                                                                                                                                                                                                                                                             |                     |    |                |                |                    |     |         |                     |                     |                           |                      |                      |                       |                      |     |  |                     |  |  |                      |                     |                     |                     |                     |                            |                      |                    |                             |                                                                                                                                                                                                                                                                                                                                                                                                                                                                                                                                                                                                                                                                                                                                                                                                                                                       |
| Unemployed                                                                     | 3.10 (1.88 to 5.13)<br>(36 cases)                                 | 6.10 (2.17 to 17.12)                                       | 2.69 (0.93 to 7.76)<br>(43 cases)                                                                                                                                                                                                                                                                                                                                                                                                                                                                                                                                                                                                                                                                                                                                                                                                                                                                                                                                                                                                                                                                                                                                                                                                                                                                                                                                                                                                                                                                                                                                                                                                                                                                                                                                                                                                                                                                                                                                                                                                                                                                                                                                                                                                               | 1.31 (0.78 to 2.18)                                                                                                                                                                                     |                   |                     |                       |           |       |            |                     |                     |            |                                   |                       |                                                                                                                                                                                                                                                       |                     |                     |                                   |                      |                                   |                     |                                                                                                                                                                                                                                                                                                                                                                                                                                                                                                                                             |                     |    |                |                |                    |     |         |                     |                     |                           |                      |                      |                       |                      |     |  |                     |  |  |                      |                     |                     |                     |                     |                            |                      |                    |                             |                                                                                                                                                                                                                                                                                                                                                                                                                                                                                                                                                                                                                                                                                                                                                                                                                                                       |
| Precarious                                                                     | 1.52 (1.02 to 2.25)<br>(85 cases)                                 | 4.19 (1.70 to 10.32)                                       | 2.13 (0.71 to 6.34)<br>(48 cases)                                                                                                                                                                                                                                                                                                                                                                                                                                                                                                                                                                                                                                                                                                                                                                                                                                                                                                                                                                                                                                                                                                                                                                                                                                                                                                                                                                                                                                                                                                                                                                                                                                                                                                                                                                                                                                                                                                                                                                                                                                                                                                                                                                                                               | 1.03 (0.63 to 1.68)                                                                                                                                                                                     |                   |                     |                       |           |       |            |                     |                     |            |                                   |                       |                                                                                                                                                                                                                                                       |                     |                     |                                   |                      |                                   |                     |                                                                                                                                                                                                                                                                                                                                                                                                                                                                                                                                             |                     |    |                |                |                    |     |         |                     |                     |                           |                      |                      |                       |                      |     |  |                     |  |  |                      |                     |                     |                     |                     |                            |                      |                    |                             |                                                                                                                                                                                                                                                                                                                                                                                                                                                                                                                                                                                                                                                                                                                                                                                                                                                       |
| Precarious                                                                     | 63                                                                | 351                                                        |                                                                                                                                                                                                                                                                                                                                                                                                                                                                                                                                                                                                                                                                                                                                                                                                                                                                                                                                                                                                                                                                                                                                                                                                                                                                                                                                                                                                                                                                                                                                                                                                                                                                                                                                                                                                                                                                                                                                                                                                                                                                                                                                                                                                                                                 |                                                                                                                                                                                                         |                   |                     |                       |           |       |            |                     |                     |            |                                   |                       |                                                                                                                                                                                                                                                       |                     |                     |                                   |                      |                                   |                     |                                                                                                                                                                                                                                                                                                                                                                                                                                                                                                                                             |                     |    |                |                |                    |     |         |                     |                     |                           |                      |                      |                       |                      |     |  |                     |  |  |                      |                     |                     |                     |                     |                            |                      |                    |                             |                                                                                                                                                                                                                                                                                                                                                                                                                                                                                                                                                                                                                                                                                                                                                                                                                                                       |
| Unemployed                                                                     | 33                                                                | 40                                                         |                                                                                                                                                                                                                                                                                                                                                                                                                                                                                                                                                                                                                                                                                                                                                                                                                                                                                                                                                                                                                                                                                                                                                                                                                                                                                                                                                                                                                                                                                                                                                                                                                                                                                                                                                                                                                                                                                                                                                                                                                                                                                                                                                                                                                                                 |                                                                                                                                                                                                         |                   |                     |                       |           |       |            |                     |                     |            |                                   |                       |                                                                                                                                                                                                                                                       |                     |                     |                                   |                      |                                   |                     |                                                                                                                                                                                                                                                                                                                                                                                                                                                                                                                                             |                     |    |                |                |                    |     |         |                     |                     |                           |                      |                      |                       |                      |     |  |                     |  |  |                      |                     |                     |                     |                     |                            |                      |                    |                             |                                                                                                                                                                                                                                                                                                                                                                                                                                                                                                                                                                                                                                                                                                                                                                                                                                                       |
| Females                                                                        | Depressive symptoms                                               | No symptoms                                                |                                                                                                                                                                                                                                                                                                                                                                                                                                                                                                                                                                                                                                                                                                                                                                                                                                                                                                                                                                                                                                                                                                                                                                                                                                                                                                                                                                                                                                                                                                                                                                                                                                                                                                                                                                                                                                                                                                                                                                                                                                                                                                                                                                                                                                                 |                                                                                                                                                                                                         |                   |                     |                       |           |       |            |                     |                     |            |                                   |                       |                                                                                                                                                                                                                                                       |                     |                     |                                   |                      |                                   |                     |                                                                                                                                                                                                                                                                                                                                                                                                                                                                                                                                             |                     |    |                |                |                    |     |         |                     |                     |                           |                      |                      |                       |                      |     |  |                     |  |  |                      |                     |                     |                     |                     |                            |                      |                    |                             |                                                                                                                                                                                                                                                                                                                                                                                                                                                                                                                                                                                                                                                                                                                                                                                                                                                       |
| Precarious                                                                     | 70                                                                | 294                                                        |                                                                                                                                                                                                                                                                                                                                                                                                                                                                                                                                                                                                                                                                                                                                                                                                                                                                                                                                                                                                                                                                                                                                                                                                                                                                                                                                                                                                                                                                                                                                                                                                                                                                                                                                                                                                                                                                                                                                                                                                                                                                                                                                                                                                                                                 |                                                                                                                                                                                                         |                   |                     |                       |           |       |            |                     |                     |            |                                   |                       |                                                                                                                                                                                                                                                       |                     |                     |                                   |                      |                                   |                     |                                                                                                                                                                                                                                                                                                                                                                                                                                                                                                                                             |                     |    |                |                |                    |     |         |                     |                     |                           |                      |                      |                       |                      |     |  |                     |  |  |                      |                     |                     |                     |                     |                            |                      |                    |                             |                                                                                                                                                                                                                                                                                                                                                                                                                                                                                                                                                                                                                                                                                                                                                                                                                                                       |
| Unemployed                                                                     | 46                                                                | 121                                                        |                                                                                                                                                                                                                                                                                                                                                                                                                                                                                                                                                                                                                                                                                                                                                                                                                                                                                                                                                                                                                                                                                                                                                                                                                                                                                                                                                                                                                                                                                                                                                                                                                                                                                                                                                                                                                                                                                                                                                                                                                                                                                                                                                                                                                                                 |                                                                                                                                                                                                         |                   |                     |                       |           |       |            |                     |                     |            |                                   |                       |                                                                                                                                                                                                                                                       |                     |                     |                                   |                      |                                   |                     |                                                                                                                                                                                                                                                                                                                                                                                                                                                                                                                                             |                     |    |                |                |                    |     |         |                     |                     |                           |                      |                      |                       |                      |     |  |                     |  |  |                      |                     |                     |                     |                     |                            |                      |                    |                             |                                                                                                                                                                                                                                                                                                                                                                                                                                                                                                                                                                                                                                                                                                                                                                                                                                                       |
| Kim HD, Park SG 2021<br><br>Cohort<br><br>This study not included in synthesis | Korean Welfare Panel Study 2017 to 2018<br><br>19 to 59 years     | Precarious employment<br><br>New onset depressive symptoms | <p>Association between employment status change and new-onset depressive symptoms in permanent waged workers at baseline (2017), follow up 2018. Odds ratio and 95% confidence interval (table 2, page 111)</p> <table border="1"> <thead> <tr> <th></th> <th>Males</th> <th>Females</th> </tr> </thead> <tbody> <tr> <td>Permanent</td> <td>Ref</td> <td>Ref</td> </tr> <tr> <td>Precarious</td> <td>3.15 (1.30 to 7.65)</td> <td>1.99 (0.75 to 5.25)</td> </tr> <tr> <td>Unemployed</td> <td>4.50 (1.19 to 17.06)</td> <td>5.12 ( 0.88 to 29.75)</td> </tr> </tbody> </table> <p>Adjusted for age, religion, education, marital status, head of household, self-rated health</p>                                                                                                                                                                                                                                                                                                                                                                                                                                                                                                                                                                                                                                                                                                                                                                                                                                                                                                                                                                                                                                                                                                                                                                                                                                                                                                                                                                                                                                                                                                                                                              |                                                                                                                                                                                                         | Males             | Females             | Permanent             | Ref       | Ref   | Precarious | 3.15 (1.30 to 7.65) | 1.99 (0.75 to 5.25) | Unemployed | 4.50 (1.19 to 17.06)              | 5.12 ( 0.88 to 29.75) | No: Those who transitioned from permanent to precarious employment were less likely to report new-onset depressive symptoms than those who transitioned from permanent employment to unemployment but the difference is not statistically significant |                     |                     |                                   |                      |                                   |                     |                                                                                                                                                                                                                                                                                                                                                                                                                                                                                                                                             |                     |    |                |                |                    |     |         |                     |                     |                           |                      |                      |                       |                      |     |  |                     |  |  |                      |                     |                     |                     |                     |                            |                      |                    |                             |                                                                                                                                                                                                                                                                                                                                                                                                                                                                                                                                                                                                                                                                                                                                                                                                                                                       |
|                                                                                | Males                                                             | Females                                                    |                                                                                                                                                                                                                                                                                                                                                                                                                                                                                                                                                                                                                                                                                                                                                                                                                                                                                                                                                                                                                                                                                                                                                                                                                                                                                                                                                                                                                                                                                                                                                                                                                                                                                                                                                                                                                                                                                                                                                                                                                                                                                                                                                                                                                                                 |                                                                                                                                                                                                         |                   |                     |                       |           |       |            |                     |                     |            |                                   |                       |                                                                                                                                                                                                                                                       |                     |                     |                                   |                      |                                   |                     |                                                                                                                                                                                                                                                                                                                                                                                                                                                                                                                                             |                     |    |                |                |                    |     |         |                     |                     |                           |                      |                      |                       |                      |     |  |                     |  |  |                      |                     |                     |                     |                     |                            |                      |                    |                             |                                                                                                                                                                                                                                                                                                                                                                                                                                                                                                                                                                                                                                                                                                                                                                                                                                                       |
| Permanent                                                                      | Ref                                                               | Ref                                                        |                                                                                                                                                                                                                                                                                                                                                                                                                                                                                                                                                                                                                                                                                                                                                                                                                                                                                                                                                                                                                                                                                                                                                                                                                                                                                                                                                                                                                                                                                                                                                                                                                                                                                                                                                                                                                                                                                                                                                                                                                                                                                                                                                                                                                                                 |                                                                                                                                                                                                         |                   |                     |                       |           |       |            |                     |                     |            |                                   |                       |                                                                                                                                                                                                                                                       |                     |                     |                                   |                      |                                   |                     |                                                                                                                                                                                                                                                                                                                                                                                                                                                                                                                                             |                     |    |                |                |                    |     |         |                     |                     |                           |                      |                      |                       |                      |     |  |                     |  |  |                      |                     |                     |                     |                     |                            |                      |                    |                             |                                                                                                                                                                                                                                                                                                                                                                                                                                                                                                                                                                                                                                                                                                                                                                                                                                                       |
| Precarious                                                                     | 3.15 (1.30 to 7.65)                                               | 1.99 (0.75 to 5.25)                                        |                                                                                                                                                                                                                                                                                                                                                                                                                                                                                                                                                                                                                                                                                                                                                                                                                                                                                                                                                                                                                                                                                                                                                                                                                                                                                                                                                                                                                                                                                                                                                                                                                                                                                                                                                                                                                                                                                                                                                                                                                                                                                                                                                                                                                                                 |                                                                                                                                                                                                         |                   |                     |                       |           |       |            |                     |                     |            |                                   |                       |                                                                                                                                                                                                                                                       |                     |                     |                                   |                      |                                   |                     |                                                                                                                                                                                                                                                                                                                                                                                                                                                                                                                                             |                     |    |                |                |                    |     |         |                     |                     |                           |                      |                      |                       |                      |     |  |                     |  |  |                      |                     |                     |                     |                     |                            |                      |                    |                             |                                                                                                                                                                                                                                                                                                                                                                                                                                                                                                                                                                                                                                                                                                                                                                                                                                                       |
| Unemployed                                                                     | 4.50 (1.19 to 17.06)                                              | 5.12 ( 0.88 to 29.75)                                      |                                                                                                                                                                                                                                                                                                                                                                                                                                                                                                                                                                                                                                                                                                                                                                                                                                                                                                                                                                                                                                                                                                                                                                                                                                                                                                                                                                                                                                                                                                                                                                                                                                                                                                                                                                                                                                                                                                                                                                                                                                                                                                                                                                                                                                                 |                                                                                                                                                                                                         |                   |                     |                       |           |       |            |                     |                     |            |                                   |                       |                                                                                                                                                                                                                                                       |                     |                     |                                   |                      |                                   |                     |                                                                                                                                                                                                                                                                                                                                                                                                                                                                                                                                             |                     |    |                |                |                    |     |         |                     |                     |                           |                      |                      |                       |                      |     |  |                     |  |  |                      |                     |                     |                     |                     |                            |                      |                    |                             |                                                                                                                                                                                                                                                                                                                                                                                                                                                                                                                                                                                                                                                                                                                                                                                                                                                       |
| Kim SS et al. 2012<br><br>Cohort<br><br>This study not included in synthesis   | Korean Welfare Panel Study 2007 to 2009<br><br>18 years and above | Insecure employment<br><br>New onset depressive symptoms   | <p>Association between change in employment status and new-onset depressive symptoms (2008). Results for sub population - this excludes those with a disability or chronic disease and without depressive symptoms in 2006 and 2007. Odds ratios and 95% confidence intervals. Employment status baseline 2007, follow up 2008 (n= 2021) (table 3, page 541)</p> <table border="1"> <thead> <tr> <th>Baseline</th> <th>Follow up</th> <th>Odds Ratio (95% CI)</th> </tr> </thead> <tbody> <tr> <td>permanent</td> <td>permanent</td> <td>1.0</td> </tr> <tr> <td>permanent</td> <td>precarious</td> <td>1.66 (0.97 to 2.84)</td> </tr> <tr> <td>permanent</td> <td>unemployed</td> <td>0.57 (0.80 to 4.05)</td> </tr> <tr> <td>precarious</td> <td>precarious</td> <td>1.44 (0.94 to 2.23)</td> </tr> <tr> <td>precarious</td> <td>permanent</td> <td>1.22 (0.75 to 1.96)</td> </tr> <tr> <td>precarious</td> <td>unemployed</td> <td>2.67 (0.84 to 8.40)</td> </tr> </tbody> </table> <p>Gender-specific association between change in employment status and new-onset depressive symptoms (2008) fully adjusted model. Baseline 2007, follow up 2008. Odds ratios and 95% confidence intervals (table 4, page 541)</p> <table border="1"> <thead> <tr> <th></th> <th>Male (n= 1296)</th> <th>Female (n=725)</th> </tr> </thead> <tbody> <tr> <td>Baseline permanent</td> <td>1.0</td> <td>1.0</td> </tr> <tr> <td>Follow up permanent</td> <td>1.19 (0.57 to 2.50)</td> <td>2.88 (1.24 - 6.66) p&lt;0.05</td> </tr> <tr> <td>Follow up precarious</td> <td>1.54 (0.21 to 10.98)</td> <td>None became depressed</td> </tr> <tr> <td>Follow up unemployed</td> <td></td> <td></td> </tr> <tr> <td>Baseline precarious</td> <td></td> <td></td> </tr> <tr> <td>Follow up precarious</td> <td>1.59 (0.90 to 2.81)</td> <td>1.50 (0.69 to 3.25)</td> </tr> <tr> <td>Follow up permanent</td> <td>0.76 (0.39 to 1.46)</td> <td>2.57 (1.20 to 5.52) p&lt;0.05</td> </tr> <tr> <td>Follow up unemployed</td> <td>0.84 (0.10 to 7.0)</td> <td>8.01 (1.99 to 32.26) p&lt;0.01</td> </tr> </tbody> </table> <p>Adjusted for age, sex, marital status, educational level, household equalised income, residential area and smoking status at baseline</p> | Baseline                                                                                                                                                                                                | Follow up         | Odds Ratio (95% CI) | permanent             | permanent | 1.0   | permanent  | precarious          | 1.66 (0.97 to 2.84) | permanent  | unemployed                        | 0.57 (0.80 to 4.05)   | precarious                                                                                                                                                                                                                                            | precarious          | 1.44 (0.94 to 2.23) | precarious                        | permanent            | 1.22 (0.75 to 1.96)               | precarious          | unemployed                                                                                                                                                                                                                                                                                                                                                                                                                                                                                                                                  | 2.67 (0.84 to 8.40) |    | Male (n= 1296) | Female (n=725) | Baseline permanent | 1.0 | 1.0     | Follow up permanent | 1.19 (0.57 to 2.50) | 2.88 (1.24 - 6.66) p<0.05 | Follow up precarious | 1.54 (0.21 to 10.98) | None became depressed | Follow up unemployed |     |  | Baseline precarious |  |  | Follow up precarious | 1.59 (0.90 to 2.81) | 1.50 (0.69 to 3.25) | Follow up permanent | 0.76 (0.39 to 1.46) | 2.57 (1.20 to 5.52) p<0.05 | Follow up unemployed | 0.84 (0.10 to 7.0) | 8.01 (1.99 to 32.26) p<0.01 | <p>No: In workers in precarious employment at baseline those who were unemployed at follow up were more likely to report new onset of depressive symptoms than those who remained in precarious employment but the differences were not statistically significant.</p> <p>Males in precarious employment at baseline and at follow up were more likely to report new onset depressive symptoms than those who were in precarious employment at baseline but unemployed at follow up but the difference is unlikely to be statistically significant.</p> <p>Females in precarious employment at baseline and follow up were less likely to report new onset depressive symptoms at follow up than those who were in precarious employment at baseline and unemployed at follow up, but the difference is unlikely to be statistically significant.</p> |
| Baseline                                                                       | Follow up                                                         | Odds Ratio (95% CI)                                        |                                                                                                                                                                                                                                                                                                                                                                                                                                                                                                                                                                                                                                                                                                                                                                                                                                                                                                                                                                                                                                                                                                                                                                                                                                                                                                                                                                                                                                                                                                                                                                                                                                                                                                                                                                                                                                                                                                                                                                                                                                                                                                                                                                                                                                                 |                                                                                                                                                                                                         |                   |                     |                       |           |       |            |                     |                     |            |                                   |                       |                                                                                                                                                                                                                                                       |                     |                     |                                   |                      |                                   |                     |                                                                                                                                                                                                                                                                                                                                                                                                                                                                                                                                             |                     |    |                |                |                    |     |         |                     |                     |                           |                      |                      |                       |                      |     |  |                     |  |  |                      |                     |                     |                     |                     |                            |                      |                    |                             |                                                                                                                                                                                                                                                                                                                                                                                                                                                                                                                                                                                                                                                                                                                                                                                                                                                       |
| permanent                                                                      | permanent                                                         | 1.0                                                        |                                                                                                                                                                                                                                                                                                                                                                                                                                                                                                                                                                                                                                                                                                                                                                                                                                                                                                                                                                                                                                                                                                                                                                                                                                                                                                                                                                                                                                                                                                                                                                                                                                                                                                                                                                                                                                                                                                                                                                                                                                                                                                                                                                                                                                                 |                                                                                                                                                                                                         |                   |                     |                       |           |       |            |                     |                     |            |                                   |                       |                                                                                                                                                                                                                                                       |                     |                     |                                   |                      |                                   |                     |                                                                                                                                                                                                                                                                                                                                                                                                                                                                                                                                             |                     |    |                |                |                    |     |         |                     |                     |                           |                      |                      |                       |                      |     |  |                     |  |  |                      |                     |                     |                     |                     |                            |                      |                    |                             |                                                                                                                                                                                                                                                                                                                                                                                                                                                                                                                                                                                                                                                                                                                                                                                                                                                       |
| permanent                                                                      | precarious                                                        | 1.66 (0.97 to 2.84)                                        |                                                                                                                                                                                                                                                                                                                                                                                                                                                                                                                                                                                                                                                                                                                                                                                                                                                                                                                                                                                                                                                                                                                                                                                                                                                                                                                                                                                                                                                                                                                                                                                                                                                                                                                                                                                                                                                                                                                                                                                                                                                                                                                                                                                                                                                 |                                                                                                                                                                                                         |                   |                     |                       |           |       |            |                     |                     |            |                                   |                       |                                                                                                                                                                                                                                                       |                     |                     |                                   |                      |                                   |                     |                                                                                                                                                                                                                                                                                                                                                                                                                                                                                                                                             |                     |    |                |                |                    |     |         |                     |                     |                           |                      |                      |                       |                      |     |  |                     |  |  |                      |                     |                     |                     |                     |                            |                      |                    |                             |                                                                                                                                                                                                                                                                                                                                                                                                                                                                                                                                                                                                                                                                                                                                                                                                                                                       |
| permanent                                                                      | unemployed                                                        | 0.57 (0.80 to 4.05)                                        |                                                                                                                                                                                                                                                                                                                                                                                                                                                                                                                                                                                                                                                                                                                                                                                                                                                                                                                                                                                                                                                                                                                                                                                                                                                                                                                                                                                                                                                                                                                                                                                                                                                                                                                                                                                                                                                                                                                                                                                                                                                                                                                                                                                                                                                 |                                                                                                                                                                                                         |                   |                     |                       |           |       |            |                     |                     |            |                                   |                       |                                                                                                                                                                                                                                                       |                     |                     |                                   |                      |                                   |                     |                                                                                                                                                                                                                                                                                                                                                                                                                                                                                                                                             |                     |    |                |                |                    |     |         |                     |                     |                           |                      |                      |                       |                      |     |  |                     |  |  |                      |                     |                     |                     |                     |                            |                      |                    |                             |                                                                                                                                                                                                                                                                                                                                                                                                                                                                                                                                                                                                                                                                                                                                                                                                                                                       |
| precarious                                                                     | precarious                                                        | 1.44 (0.94 to 2.23)                                        |                                                                                                                                                                                                                                                                                                                                                                                                                                                                                                                                                                                                                                                                                                                                                                                                                                                                                                                                                                                                                                                                                                                                                                                                                                                                                                                                                                                                                                                                                                                                                                                                                                                                                                                                                                                                                                                                                                                                                                                                                                                                                                                                                                                                                                                 |                                                                                                                                                                                                         |                   |                     |                       |           |       |            |                     |                     |            |                                   |                       |                                                                                                                                                                                                                                                       |                     |                     |                                   |                      |                                   |                     |                                                                                                                                                                                                                                                                                                                                                                                                                                                                                                                                             |                     |    |                |                |                    |     |         |                     |                     |                           |                      |                      |                       |                      |     |  |                     |  |  |                      |                     |                     |                     |                     |                            |                      |                    |                             |                                                                                                                                                                                                                                                                                                                                                                                                                                                                                                                                                                                                                                                                                                                                                                                                                                                       |
| precarious                                                                     | permanent                                                         | 1.22 (0.75 to 1.96)                                        |                                                                                                                                                                                                                                                                                                                                                                                                                                                                                                                                                                                                                                                                                                                                                                                                                                                                                                                                                                                                                                                                                                                                                                                                                                                                                                                                                                                                                                                                                                                                                                                                                                                                                                                                                                                                                                                                                                                                                                                                                                                                                                                                                                                                                                                 |                                                                                                                                                                                                         |                   |                     |                       |           |       |            |                     |                     |            |                                   |                       |                                                                                                                                                                                                                                                       |                     |                     |                                   |                      |                                   |                     |                                                                                                                                                                                                                                                                                                                                                                                                                                                                                                                                             |                     |    |                |                |                    |     |         |                     |                     |                           |                      |                      |                       |                      |     |  |                     |  |  |                      |                     |                     |                     |                     |                            |                      |                    |                             |                                                                                                                                                                                                                                                                                                                                                                                                                                                                                                                                                                                                                                                                                                                                                                                                                                                       |
| precarious                                                                     | unemployed                                                        | 2.67 (0.84 to 8.40)                                        |                                                                                                                                                                                                                                                                                                                                                                                                                                                                                                                                                                                                                                                                                                                                                                                                                                                                                                                                                                                                                                                                                                                                                                                                                                                                                                                                                                                                                                                                                                                                                                                                                                                                                                                                                                                                                                                                                                                                                                                                                                                                                                                                                                                                                                                 |                                                                                                                                                                                                         |                   |                     |                       |           |       |            |                     |                     |            |                                   |                       |                                                                                                                                                                                                                                                       |                     |                     |                                   |                      |                                   |                     |                                                                                                                                                                                                                                                                                                                                                                                                                                                                                                                                             |                     |    |                |                |                    |     |         |                     |                     |                           |                      |                      |                       |                      |     |  |                     |  |  |                      |                     |                     |                     |                     |                            |                      |                    |                             |                                                                                                                                                                                                                                                                                                                                                                                                                                                                                                                                                                                                                                                                                                                                                                                                                                                       |
|                                                                                | Male (n= 1296)                                                    | Female (n=725)                                             |                                                                                                                                                                                                                                                                                                                                                                                                                                                                                                                                                                                                                                                                                                                                                                                                                                                                                                                                                                                                                                                                                                                                                                                                                                                                                                                                                                                                                                                                                                                                                                                                                                                                                                                                                                                                                                                                                                                                                                                                                                                                                                                                                                                                                                                 |                                                                                                                                                                                                         |                   |                     |                       |           |       |            |                     |                     |            |                                   |                       |                                                                                                                                                                                                                                                       |                     |                     |                                   |                      |                                   |                     |                                                                                                                                                                                                                                                                                                                                                                                                                                                                                                                                             |                     |    |                |                |                    |     |         |                     |                     |                           |                      |                      |                       |                      |     |  |                     |  |  |                      |                     |                     |                     |                     |                            |                      |                    |                             |                                                                                                                                                                                                                                                                                                                                                                                                                                                                                                                                                                                                                                                                                                                                                                                                                                                       |
| Baseline permanent                                                             | 1.0                                                               | 1.0                                                        |                                                                                                                                                                                                                                                                                                                                                                                                                                                                                                                                                                                                                                                                                                                                                                                                                                                                                                                                                                                                                                                                                                                                                                                                                                                                                                                                                                                                                                                                                                                                                                                                                                                                                                                                                                                                                                                                                                                                                                                                                                                                                                                                                                                                                                                 |                                                                                                                                                                                                         |                   |                     |                       |           |       |            |                     |                     |            |                                   |                       |                                                                                                                                                                                                                                                       |                     |                     |                                   |                      |                                   |                     |                                                                                                                                                                                                                                                                                                                                                                                                                                                                                                                                             |                     |    |                |                |                    |     |         |                     |                     |                           |                      |                      |                       |                      |     |  |                     |  |  |                      |                     |                     |                     |                     |                            |                      |                    |                             |                                                                                                                                                                                                                                                                                                                                                                                                                                                                                                                                                                                                                                                                                                                                                                                                                                                       |
| Follow up permanent                                                            | 1.19 (0.57 to 2.50)                                               | 2.88 (1.24 - 6.66) p<0.05                                  |                                                                                                                                                                                                                                                                                                                                                                                                                                                                                                                                                                                                                                                                                                                                                                                                                                                                                                                                                                                                                                                                                                                                                                                                                                                                                                                                                                                                                                                                                                                                                                                                                                                                                                                                                                                                                                                                                                                                                                                                                                                                                                                                                                                                                                                 |                                                                                                                                                                                                         |                   |                     |                       |           |       |            |                     |                     |            |                                   |                       |                                                                                                                                                                                                                                                       |                     |                     |                                   |                      |                                   |                     |                                                                                                                                                                                                                                                                                                                                                                                                                                                                                                                                             |                     |    |                |                |                    |     |         |                     |                     |                           |                      |                      |                       |                      |     |  |                     |  |  |                      |                     |                     |                     |                     |                            |                      |                    |                             |                                                                                                                                                                                                                                                                                                                                                                                                                                                                                                                                                                                                                                                                                                                                                                                                                                                       |
| Follow up precarious                                                           | 1.54 (0.21 to 10.98)                                              | None became depressed                                      |                                                                                                                                                                                                                                                                                                                                                                                                                                                                                                                                                                                                                                                                                                                                                                                                                                                                                                                                                                                                                                                                                                                                                                                                                                                                                                                                                                                                                                                                                                                                                                                                                                                                                                                                                                                                                                                                                                                                                                                                                                                                                                                                                                                                                                                 |                                                                                                                                                                                                         |                   |                     |                       |           |       |            |                     |                     |            |                                   |                       |                                                                                                                                                                                                                                                       |                     |                     |                                   |                      |                                   |                     |                                                                                                                                                                                                                                                                                                                                                                                                                                                                                                                                             |                     |    |                |                |                    |     |         |                     |                     |                           |                      |                      |                       |                      |     |  |                     |  |  |                      |                     |                     |                     |                     |                            |                      |                    |                             |                                                                                                                                                                                                                                                                                                                                                                                                                                                                                                                                                                                                                                                                                                                                                                                                                                                       |
| Follow up unemployed                                                           |                                                                   |                                                            |                                                                                                                                                                                                                                                                                                                                                                                                                                                                                                                                                                                                                                                                                                                                                                                                                                                                                                                                                                                                                                                                                                                                                                                                                                                                                                                                                                                                                                                                                                                                                                                                                                                                                                                                                                                                                                                                                                                                                                                                                                                                                                                                                                                                                                                 |                                                                                                                                                                                                         |                   |                     |                       |           |       |            |                     |                     |            |                                   |                       |                                                                                                                                                                                                                                                       |                     |                     |                                   |                      |                                   |                     |                                                                                                                                                                                                                                                                                                                                                                                                                                                                                                                                             |                     |    |                |                |                    |     |         |                     |                     |                           |                      |                      |                       |                      |     |  |                     |  |  |                      |                     |                     |                     |                     |                            |                      |                    |                             |                                                                                                                                                                                                                                                                                                                                                                                                                                                                                                                                                                                                                                                                                                                                                                                                                                                       |
| Baseline precarious                                                            |                                                                   |                                                            |                                                                                                                                                                                                                                                                                                                                                                                                                                                                                                                                                                                                                                                                                                                                                                                                                                                                                                                                                                                                                                                                                                                                                                                                                                                                                                                                                                                                                                                                                                                                                                                                                                                                                                                                                                                                                                                                                                                                                                                                                                                                                                                                                                                                                                                 |                                                                                                                                                                                                         |                   |                     |                       |           |       |            |                     |                     |            |                                   |                       |                                                                                                                                                                                                                                                       |                     |                     |                                   |                      |                                   |                     |                                                                                                                                                                                                                                                                                                                                                                                                                                                                                                                                             |                     |    |                |                |                    |     |         |                     |                     |                           |                      |                      |                       |                      |     |  |                     |  |  |                      |                     |                     |                     |                     |                            |                      |                    |                             |                                                                                                                                                                                                                                                                                                                                                                                                                                                                                                                                                                                                                                                                                                                                                                                                                                                       |
| Follow up precarious                                                           | 1.59 (0.90 to 2.81)                                               | 1.50 (0.69 to 3.25)                                        |                                                                                                                                                                                                                                                                                                                                                                                                                                                                                                                                                                                                                                                                                                                                                                                                                                                                                                                                                                                                                                                                                                                                                                                                                                                                                                                                                                                                                                                                                                                                                                                                                                                                                                                                                                                                                                                                                                                                                                                                                                                                                                                                                                                                                                                 |                                                                                                                                                                                                         |                   |                     |                       |           |       |            |                     |                     |            |                                   |                       |                                                                                                                                                                                                                                                       |                     |                     |                                   |                      |                                   |                     |                                                                                                                                                                                                                                                                                                                                                                                                                                                                                                                                             |                     |    |                |                |                    |     |         |                     |                     |                           |                      |                      |                       |                      |     |  |                     |  |  |                      |                     |                     |                     |                     |                            |                      |                    |                             |                                                                                                                                                                                                                                                                                                                                                                                                                                                                                                                                                                                                                                                                                                                                                                                                                                                       |
| Follow up permanent                                                            | 0.76 (0.39 to 1.46)                                               | 2.57 (1.20 to 5.52) p<0.05                                 |                                                                                                                                                                                                                                                                                                                                                                                                                                                                                                                                                                                                                                                                                                                                                                                                                                                                                                                                                                                                                                                                                                                                                                                                                                                                                                                                                                                                                                                                                                                                                                                                                                                                                                                                                                                                                                                                                                                                                                                                                                                                                                                                                                                                                                                 |                                                                                                                                                                                                         |                   |                     |                       |           |       |            |                     |                     |            |                                   |                       |                                                                                                                                                                                                                                                       |                     |                     |                                   |                      |                                   |                     |                                                                                                                                                                                                                                                                                                                                                                                                                                                                                                                                             |                     |    |                |                |                    |     |         |                     |                     |                           |                      |                      |                       |                      |     |  |                     |  |  |                      |                     |                     |                     |                     |                            |                      |                    |                             |                                                                                                                                                                                                                                                                                                                                                                                                                                                                                                                                                                                                                                                                                                                                                                                                                                                       |
| Follow up unemployed                                                           | 0.84 (0.10 to 7.0)                                                | 8.01 (1.99 to 32.26) p<0.01                                |                                                                                                                                                                                                                                                                                                                                                                                                                                                                                                                                                                                                                                                                                                                                                                                                                                                                                                                                                                                                                                                                                                                                                                                                                                                                                                                                                                                                                                                                                                                                                                                                                                                                                                                                                                                                                                                                                                                                                                                                                                                                                                                                                                                                                                                 |                                                                                                                                                                                                         |                   |                     |                       |           |       |            |                     |                     |            |                                   |                       |                                                                                                                                                                                                                                                       |                     |                     |                                   |                      |                                   |                     |                                                                                                                                                                                                                                                                                                                                                                                                                                                                                                                                             |                     |    |                |                |                    |     |         |                     |                     |                           |                      |                      |                       |                      |     |  |                     |  |  |                      |                     |                     |                     |                     |                            |                      |                    |                             |                                                                                                                                                                                                                                                                                                                                                                                                                                                                                                                                                                                                                                                                                                                                                                                                                                                       |

| Reference/<br>Study design                                                   | Data source/<br>Population<br>range                               | Poor/bad job<br>definition<br>Outcome                         | Results from paper                                                                                                                                                                                                                                                                                                                                                                                                                                                                                                                                                                                                                                                                                                                                                                                                                                                                                                                                                                                                                                                                                                                                                                                                                                                                                                                                                                                                                                                                                                  | Is any job better than no job?<br>Where OR has been calculated by OES exposure is bad/poor job, is unadjusted and data used to calculate may have been derived from percentages in study results tables |                         |                          |                     |                            |                     |                            |                           |                              |                      |                                                                                                                                                                                                                                                                                                                                                                                                                                                                                                                                                                                                                                                                                                                                                                                                                                                                                                                                                                                                                                                                                                                                                                                                                                                                                                                                                                                                                                                                                                                                                                                                                                                                                                                                                                                                                                                                                                                                                                                                                                                                                                      |                           |                     |                                   |                                   |                                                                                                                                                                                                                                                                                                                                                                                                                                                                                         |      |                                    |    |     |                                     |    |      |                                       |     |      |  |                  |                     |                          |     |      |
|------------------------------------------------------------------------------|-------------------------------------------------------------------|---------------------------------------------------------------|---------------------------------------------------------------------------------------------------------------------------------------------------------------------------------------------------------------------------------------------------------------------------------------------------------------------------------------------------------------------------------------------------------------------------------------------------------------------------------------------------------------------------------------------------------------------------------------------------------------------------------------------------------------------------------------------------------------------------------------------------------------------------------------------------------------------------------------------------------------------------------------------------------------------------------------------------------------------------------------------------------------------------------------------------------------------------------------------------------------------------------------------------------------------------------------------------------------------------------------------------------------------------------------------------------------------------------------------------------------------------------------------------------------------------------------------------------------------------------------------------------------------|---------------------------------------------------------------------------------------------------------------------------------------------------------------------------------------------------------|-------------------------|--------------------------|---------------------|----------------------------|---------------------|----------------------------|---------------------------|------------------------------|----------------------|------------------------------------------------------------------------------------------------------------------------------------------------------------------------------------------------------------------------------------------------------------------------------------------------------------------------------------------------------------------------------------------------------------------------------------------------------------------------------------------------------------------------------------------------------------------------------------------------------------------------------------------------------------------------------------------------------------------------------------------------------------------------------------------------------------------------------------------------------------------------------------------------------------------------------------------------------------------------------------------------------------------------------------------------------------------------------------------------------------------------------------------------------------------------------------------------------------------------------------------------------------------------------------------------------------------------------------------------------------------------------------------------------------------------------------------------------------------------------------------------------------------------------------------------------------------------------------------------------------------------------------------------------------------------------------------------------------------------------------------------------------------------------------------------------------------------------------------------------------------------------------------------------------------------------------------------------------------------------------------------------------------------------------------------------------------------------------------------------|---------------------------|---------------------|-----------------------------------|-----------------------------------|-----------------------------------------------------------------------------------------------------------------------------------------------------------------------------------------------------------------------------------------------------------------------------------------------------------------------------------------------------------------------------------------------------------------------------------------------------------------------------------------|------|------------------------------------|----|-----|-------------------------------------|----|------|---------------------------------------|-----|------|--|------------------|---------------------|--------------------------|-----|------|
| Kim SS et al. 2013<br><br>Cohort<br><br>This study not included in synthesis | Korean Welfare Panel Study 2007 to 2010<br><br>18 years and above | Insecure employment<br><br>New onset depressive symptoms      | Association between gain of employment and depressive symptoms at follow up (2008 or 2010) among workers who were unemployed at baseline (2007 or 2009). Full population excluded respondents who had depressive symptoms at baseline (2007 or 2009); subpopulation excluded respondents who depressive symptoms in any of the two prior years (2006/2007 or 2008/2009). Rate ratios and 95% confidence intervals (table 2)<br><br><table border="0" style="width: 100%; border-collapse: collapse;"> <tr> <td></td> <td style="text-align: center;">Full population (n=308)</td> <td style="text-align: center;">Subpopulation (n=249)</td> </tr> <tr> <td>Unemployed</td> <td style="text-align: center;">n= 88 1</td> <td style="text-align: center;">n= 66 1</td> </tr> <tr> <td>Part-time precarious</td> <td style="text-align: center;">n= 26 0.51 (0.15 to 1.76)</td> <td style="text-align: center;">n= 20 0.87 (0.21 to 3.60)</td> </tr> <tr> <td>Full time precarious</td> <td style="text-align: center;">n= 105 0.38 (0.18 to 0.83) p&lt;0.05</td> <td style="text-align: center;">n= 91 0.49 (0.19 to 1.25)</td> </tr> <tr> <td>Full time permanent</td> <td style="text-align: center;">n= 89 0.26 (0.11 to 0.63) p&lt;0.001</td> <td style="text-align: center;">n= 72 0.27 (0.08 to 0.86) p&lt;0.05</td> </tr> </table><br>Adjusted for age, sex, education, marital status, residential area, household income, having a chronic disease, having a disability, smoking at baseline (2007 or 2009) |                                                                                                                                                                                                         | Full population (n=308) | Subpopulation (n=249)    | Unemployed          | n= 88 1                    | n= 66 1             | Part-time precarious       | n= 26 0.51 (0.15 to 1.76) | n= 20 0.87 (0.21 to 3.60)    | Full time precarious | n= 105 0.38 (0.18 to 0.83) p<0.05                                                                                                                                                                                                                                                                                                                                                                                                                                                                                                                                                                                                                                                                                                                                                                                                                                                                                                                                                                                                                                                                                                                                                                                                                                                                                                                                                                                                                                                                                                                                                                                                                                                                                                                                                                                                                                                                                                                                                                                                                                                                    | n= 91 0.49 (0.19 to 1.25) | Full time permanent | n= 89 0.26 (0.11 to 0.63) p<0.001 | n= 72 0.27 (0.08 to 0.86) p<0.05  | No: in workers in permanent employment at baseline those who were in precarious employment at follow up were more likely to report new onset of depressive symptoms than those who were unemployed but the difference was not significant. In workers in precarious employment at baseline those who were unemployed at follow up were more likely to report new onset of depressive symptoms than those who remained in precarious employment but the differences were not significant |      |                                    |    |     |                                     |    |      |                                       |     |      |  |                  |                     |                          |     |      |
|                                                                              | Full population (n=308)                                           | Subpopulation (n=249)                                         |                                                                                                                                                                                                                                                                                                                                                                                                                                                                                                                                                                                                                                                                                                                                                                                                                                                                                                                                                                                                                                                                                                                                                                                                                                                                                                                                                                                                                                                                                                                     |                                                                                                                                                                                                         |                         |                          |                     |                            |                     |                            |                           |                              |                      |                                                                                                                                                                                                                                                                                                                                                                                                                                                                                                                                                                                                                                                                                                                                                                                                                                                                                                                                                                                                                                                                                                                                                                                                                                                                                                                                                                                                                                                                                                                                                                                                                                                                                                                                                                                                                                                                                                                                                                                                                                                                                                      |                           |                     |                                   |                                   |                                                                                                                                                                                                                                                                                                                                                                                                                                                                                         |      |                                    |    |     |                                     |    |      |                                       |     |      |  |                  |                     |                          |     |      |
| Unemployed                                                                   | n= 88 1                                                           | n= 66 1                                                       |                                                                                                                                                                                                                                                                                                                                                                                                                                                                                                                                                                                                                                                                                                                                                                                                                                                                                                                                                                                                                                                                                                                                                                                                                                                                                                                                                                                                                                                                                                                     |                                                                                                                                                                                                         |                         |                          |                     |                            |                     |                            |                           |                              |                      |                                                                                                                                                                                                                                                                                                                                                                                                                                                                                                                                                                                                                                                                                                                                                                                                                                                                                                                                                                                                                                                                                                                                                                                                                                                                                                                                                                                                                                                                                                                                                                                                                                                                                                                                                                                                                                                                                                                                                                                                                                                                                                      |                           |                     |                                   |                                   |                                                                                                                                                                                                                                                                                                                                                                                                                                                                                         |      |                                    |    |     |                                     |    |      |                                       |     |      |  |                  |                     |                          |     |      |
| Part-time precarious                                                         | n= 26 0.51 (0.15 to 1.76)                                         | n= 20 0.87 (0.21 to 3.60)                                     |                                                                                                                                                                                                                                                                                                                                                                                                                                                                                                                                                                                                                                                                                                                                                                                                                                                                                                                                                                                                                                                                                                                                                                                                                                                                                                                                                                                                                                                                                                                     |                                                                                                                                                                                                         |                         |                          |                     |                            |                     |                            |                           |                              |                      |                                                                                                                                                                                                                                                                                                                                                                                                                                                                                                                                                                                                                                                                                                                                                                                                                                                                                                                                                                                                                                                                                                                                                                                                                                                                                                                                                                                                                                                                                                                                                                                                                                                                                                                                                                                                                                                                                                                                                                                                                                                                                                      |                           |                     |                                   |                                   |                                                                                                                                                                                                                                                                                                                                                                                                                                                                                         |      |                                    |    |     |                                     |    |      |                                       |     |      |  |                  |                     |                          |     |      |
| Full time precarious                                                         | n= 105 0.38 (0.18 to 0.83) p<0.05                                 | n= 91 0.49 (0.19 to 1.25)                                     |                                                                                                                                                                                                                                                                                                                                                                                                                                                                                                                                                                                                                                                                                                                                                                                                                                                                                                                                                                                                                                                                                                                                                                                                                                                                                                                                                                                                                                                                                                                     |                                                                                                                                                                                                         |                         |                          |                     |                            |                     |                            |                           |                              |                      |                                                                                                                                                                                                                                                                                                                                                                                                                                                                                                                                                                                                                                                                                                                                                                                                                                                                                                                                                                                                                                                                                                                                                                                                                                                                                                                                                                                                                                                                                                                                                                                                                                                                                                                                                                                                                                                                                                                                                                                                                                                                                                      |                           |                     |                                   |                                   |                                                                                                                                                                                                                                                                                                                                                                                                                                                                                         |      |                                    |    |     |                                     |    |      |                                       |     |      |  |                  |                     |                          |     |      |
| Full time permanent                                                          | n= 89 0.26 (0.11 to 0.63) p<0.001                                 | n= 72 0.27 (0.08 to 0.86) p<0.05                              |                                                                                                                                                                                                                                                                                                                                                                                                                                                                                                                                                                                                                                                                                                                                                                                                                                                                                                                                                                                                                                                                                                                                                                                                                                                                                                                                                                                                                                                                                                                     |                                                                                                                                                                                                         |                         |                          |                     |                            |                     |                            |                           |                              |                      |                                                                                                                                                                                                                                                                                                                                                                                                                                                                                                                                                                                                                                                                                                                                                                                                                                                                                                                                                                                                                                                                                                                                                                                                                                                                                                                                                                                                                                                                                                                                                                                                                                                                                                                                                                                                                                                                                                                                                                                                                                                                                                      |                           |                     |                                   |                                   |                                                                                                                                                                                                                                                                                                                                                                                                                                                                                         |      |                                    |    |     |                                     |    |      |                                       |     |      |  |                  |                     |                          |     |      |
| Kim W et al. 2019<br><br>Cohort<br><br>Same as Yoon                          | Korean Welfare Panel Study 2012 to 2017<br><br>25 to 59 years     | Insecure employment<br><br>Suicidal ideation in the past year | Employment factors associated with suicide ideation. Odds ratios and 95% confidence intervals. Reference is remaining in permanent employment<br><br><table border="0" style="width: 100%; border-collapse: collapse;"> <tr> <td>Employment transition</td> <td></td> </tr> <tr> <td>Precarious to precarious</td> <td style="text-align: center;">1.86 (1.21 to 2.85)</td> </tr> <tr> <td>Precarious to unemployment</td> <td style="text-align: center;">1.43 (1.05 to 1.95)</td> </tr> <tr> <td>Unemployment to precarious</td> <td style="text-align: center;">1.11 (0.49 to 2.50)</td> </tr> <tr> <td>Unemployment to unemployment</td> <td style="text-align: center;">1.57 (0.86 to 2.87)</td> </tr> </table><br>Adjusted for sex, age, region, education level, marital status, income, disability, chronic disease, depression and year                                                                                                                                                                                                                                                                                                                                                                                                                                                                                                                                                                                                                                                                    | Employment transition                                                                                                                                                                                   |                         | Precarious to precarious | 1.86 (1.21 to 2.85) | Precarious to unemployment | 1.43 (1.05 to 1.95) | Unemployment to precarious | 1.11 (0.49 to 2.50)       | Unemployment to unemployment | 1.57 (0.86 to 2.87)  | Yes: Those who remained in precarious employment were significantly less likely to report suicide ideation than those who remained unemployed.<br><br>Yes: Those who remained in precarious employment were significantly less likely to report suicide ideation than those who moved from precarious employment to unemployment.<br><br>No: Those who transitioned from unemployment to precarious employment were slightly less likely to report suicide ideation than those who transitioned from precarious employment to unemployment but the difference is not statistically significant<br><br>No: Those who transitioned from unemployment to precarious employment were more likely to report suicide ideation than those who remained unemployed. However, this difference is not statistically significant<br><br>From table 1, page 5 <table border="1" style="width: 100%; border-collapse: collapse; margin-top: 10px;"> <thead> <tr> <th></th> <th style="text-align: center;">Suicide ideation</th> <th style="text-align: center;">No suicide ideation</th> </tr> </thead> <tbody> <tr> <td>Precarious to precarious (n=5166)</td> <td style="text-align: center;">148</td> <td style="text-align: center;">5018</td> </tr> <tr> <td>Precarious to unemployment (n=953)</td> <td style="text-align: center;">42</td> <td style="text-align: center;">911</td> </tr> <tr> <td>Unemployment to precarious (n=1161)</td> <td style="text-align: center;">47</td> <td style="text-align: center;">1114</td> </tr> <tr> <td>Unemployment to unemployment (n=6796)</td> <td style="text-align: center;">266</td> <td style="text-align: center;">6503</td> </tr> </tbody> </table><br><table border="1" style="width: 100%; border-collapse: collapse; margin-top: 10px;"> <thead> <tr> <th></th> <th style="text-align: center;">Suicide ideation</th> <th style="text-align: center;">No suicide ideation</th> </tr> </thead> <tbody> <tr> <td>Precarious to precarious</td> <td style="text-align: center;">148</td> <td style="text-align: center;">5018</td> </tr> </tbody> </table> |                           | Suicide ideation    | No suicide ideation               | Precarious to precarious (n=5166) | 148                                                                                                                                                                                                                                                                                                                                                                                                                                                                                     | 5018 | Precarious to unemployment (n=953) | 42 | 911 | Unemployment to precarious (n=1161) | 47 | 1114 | Unemployment to unemployment (n=6796) | 266 | 6503 |  | Suicide ideation | No suicide ideation | Precarious to precarious | 148 | 5018 |
| Employment transition                                                        |                                                                   |                                                               |                                                                                                                                                                                                                                                                                                                                                                                                                                                                                                                                                                                                                                                                                                                                                                                                                                                                                                                                                                                                                                                                                                                                                                                                                                                                                                                                                                                                                                                                                                                     |                                                                                                                                                                                                         |                         |                          |                     |                            |                     |                            |                           |                              |                      |                                                                                                                                                                                                                                                                                                                                                                                                                                                                                                                                                                                                                                                                                                                                                                                                                                                                                                                                                                                                                                                                                                                                                                                                                                                                                                                                                                                                                                                                                                                                                                                                                                                                                                                                                                                                                                                                                                                                                                                                                                                                                                      |                           |                     |                                   |                                   |                                                                                                                                                                                                                                                                                                                                                                                                                                                                                         |      |                                    |    |     |                                     |    |      |                                       |     |      |  |                  |                     |                          |     |      |
| Precarious to precarious                                                     | 1.86 (1.21 to 2.85)                                               |                                                               |                                                                                                                                                                                                                                                                                                                                                                                                                                                                                                                                                                                                                                                                                                                                                                                                                                                                                                                                                                                                                                                                                                                                                                                                                                                                                                                                                                                                                                                                                                                     |                                                                                                                                                                                                         |                         |                          |                     |                            |                     |                            |                           |                              |                      |                                                                                                                                                                                                                                                                                                                                                                                                                                                                                                                                                                                                                                                                                                                                                                                                                                                                                                                                                                                                                                                                                                                                                                                                                                                                                                                                                                                                                                                                                                                                                                                                                                                                                                                                                                                                                                                                                                                                                                                                                                                                                                      |                           |                     |                                   |                                   |                                                                                                                                                                                                                                                                                                                                                                                                                                                                                         |      |                                    |    |     |                                     |    |      |                                       |     |      |  |                  |                     |                          |     |      |
| Precarious to unemployment                                                   | 1.43 (1.05 to 1.95)                                               |                                                               |                                                                                                                                                                                                                                                                                                                                                                                                                                                                                                                                                                                                                                                                                                                                                                                                                                                                                                                                                                                                                                                                                                                                                                                                                                                                                                                                                                                                                                                                                                                     |                                                                                                                                                                                                         |                         |                          |                     |                            |                     |                            |                           |                              |                      |                                                                                                                                                                                                                                                                                                                                                                                                                                                                                                                                                                                                                                                                                                                                                                                                                                                                                                                                                                                                                                                                                                                                                                                                                                                                                                                                                                                                                                                                                                                                                                                                                                                                                                                                                                                                                                                                                                                                                                                                                                                                                                      |                           |                     |                                   |                                   |                                                                                                                                                                                                                                                                                                                                                                                                                                                                                         |      |                                    |    |     |                                     |    |      |                                       |     |      |  |                  |                     |                          |     |      |
| Unemployment to precarious                                                   | 1.11 (0.49 to 2.50)                                               |                                                               |                                                                                                                                                                                                                                                                                                                                                                                                                                                                                                                                                                                                                                                                                                                                                                                                                                                                                                                                                                                                                                                                                                                                                                                                                                                                                                                                                                                                                                                                                                                     |                                                                                                                                                                                                         |                         |                          |                     |                            |                     |                            |                           |                              |                      |                                                                                                                                                                                                                                                                                                                                                                                                                                                                                                                                                                                                                                                                                                                                                                                                                                                                                                                                                                                                                                                                                                                                                                                                                                                                                                                                                                                                                                                                                                                                                                                                                                                                                                                                                                                                                                                                                                                                                                                                                                                                                                      |                           |                     |                                   |                                   |                                                                                                                                                                                                                                                                                                                                                                                                                                                                                         |      |                                    |    |     |                                     |    |      |                                       |     |      |  |                  |                     |                          |     |      |
| Unemployment to unemployment                                                 | 1.57 (0.86 to 2.87)                                               |                                                               |                                                                                                                                                                                                                                                                                                                                                                                                                                                                                                                                                                                                                                                                                                                                                                                                                                                                                                                                                                                                                                                                                                                                                                                                                                                                                                                                                                                                                                                                                                                     |                                                                                                                                                                                                         |                         |                          |                     |                            |                     |                            |                           |                              |                      |                                                                                                                                                                                                                                                                                                                                                                                                                                                                                                                                                                                                                                                                                                                                                                                                                                                                                                                                                                                                                                                                                                                                                                                                                                                                                                                                                                                                                                                                                                                                                                                                                                                                                                                                                                                                                                                                                                                                                                                                                                                                                                      |                           |                     |                                   |                                   |                                                                                                                                                                                                                                                                                                                                                                                                                                                                                         |      |                                    |    |     |                                     |    |      |                                       |     |      |  |                  |                     |                          |     |      |
|                                                                              | Suicide ideation                                                  | No suicide ideation                                           |                                                                                                                                                                                                                                                                                                                                                                                                                                                                                                                                                                                                                                                                                                                                                                                                                                                                                                                                                                                                                                                                                                                                                                                                                                                                                                                                                                                                                                                                                                                     |                                                                                                                                                                                                         |                         |                          |                     |                            |                     |                            |                           |                              |                      |                                                                                                                                                                                                                                                                                                                                                                                                                                                                                                                                                                                                                                                                                                                                                                                                                                                                                                                                                                                                                                                                                                                                                                                                                                                                                                                                                                                                                                                                                                                                                                                                                                                                                                                                                                                                                                                                                                                                                                                                                                                                                                      |                           |                     |                                   |                                   |                                                                                                                                                                                                                                                                                                                                                                                                                                                                                         |      |                                    |    |     |                                     |    |      |                                       |     |      |  |                  |                     |                          |     |      |
| Precarious to precarious (n=5166)                                            | 148                                                               | 5018                                                          |                                                                                                                                                                                                                                                                                                                                                                                                                                                                                                                                                                                                                                                                                                                                                                                                                                                                                                                                                                                                                                                                                                                                                                                                                                                                                                                                                                                                                                                                                                                     |                                                                                                                                                                                                         |                         |                          |                     |                            |                     |                            |                           |                              |                      |                                                                                                                                                                                                                                                                                                                                                                                                                                                                                                                                                                                                                                                                                                                                                                                                                                                                                                                                                                                                                                                                                                                                                                                                                                                                                                                                                                                                                                                                                                                                                                                                                                                                                                                                                                                                                                                                                                                                                                                                                                                                                                      |                           |                     |                                   |                                   |                                                                                                                                                                                                                                                                                                                                                                                                                                                                                         |      |                                    |    |     |                                     |    |      |                                       |     |      |  |                  |                     |                          |     |      |
| Precarious to unemployment (n=953)                                           | 42                                                                | 911                                                           |                                                                                                                                                                                                                                                                                                                                                                                                                                                                                                                                                                                                                                                                                                                                                                                                                                                                                                                                                                                                                                                                                                                                                                                                                                                                                                                                                                                                                                                                                                                     |                                                                                                                                                                                                         |                         |                          |                     |                            |                     |                            |                           |                              |                      |                                                                                                                                                                                                                                                                                                                                                                                                                                                                                                                                                                                                                                                                                                                                                                                                                                                                                                                                                                                                                                                                                                                                                                                                                                                                                                                                                                                                                                                                                                                                                                                                                                                                                                                                                                                                                                                                                                                                                                                                                                                                                                      |                           |                     |                                   |                                   |                                                                                                                                                                                                                                                                                                                                                                                                                                                                                         |      |                                    |    |     |                                     |    |      |                                       |     |      |  |                  |                     |                          |     |      |
| Unemployment to precarious (n=1161)                                          | 47                                                                | 1114                                                          |                                                                                                                                                                                                                                                                                                                                                                                                                                                                                                                                                                                                                                                                                                                                                                                                                                                                                                                                                                                                                                                                                                                                                                                                                                                                                                                                                                                                                                                                                                                     |                                                                                                                                                                                                         |                         |                          |                     |                            |                     |                            |                           |                              |                      |                                                                                                                                                                                                                                                                                                                                                                                                                                                                                                                                                                                                                                                                                                                                                                                                                                                                                                                                                                                                                                                                                                                                                                                                                                                                                                                                                                                                                                                                                                                                                                                                                                                                                                                                                                                                                                                                                                                                                                                                                                                                                                      |                           |                     |                                   |                                   |                                                                                                                                                                                                                                                                                                                                                                                                                                                                                         |      |                                    |    |     |                                     |    |      |                                       |     |      |  |                  |                     |                          |     |      |
| Unemployment to unemployment (n=6796)                                        | 266                                                               | 6503                                                          |                                                                                                                                                                                                                                                                                                                                                                                                                                                                                                                                                                                                                                                                                                                                                                                                                                                                                                                                                                                                                                                                                                                                                                                                                                                                                                                                                                                                                                                                                                                     |                                                                                                                                                                                                         |                         |                          |                     |                            |                     |                            |                           |                              |                      |                                                                                                                                                                                                                                                                                                                                                                                                                                                                                                                                                                                                                                                                                                                                                                                                                                                                                                                                                                                                                                                                                                                                                                                                                                                                                                                                                                                                                                                                                                                                                                                                                                                                                                                                                                                                                                                                                                                                                                                                                                                                                                      |                           |                     |                                   |                                   |                                                                                                                                                                                                                                                                                                                                                                                                                                                                                         |      |                                    |    |     |                                     |    |      |                                       |     |      |  |                  |                     |                          |     |      |
|                                                                              | Suicide ideation                                                  | No suicide ideation                                           |                                                                                                                                                                                                                                                                                                                                                                                                                                                                                                                                                                                                                                                                                                                                                                                                                                                                                                                                                                                                                                                                                                                                                                                                                                                                                                                                                                                                                                                                                                                     |                                                                                                                                                                                                         |                         |                          |                     |                            |                     |                            |                           |                              |                      |                                                                                                                                                                                                                                                                                                                                                                                                                                                                                                                                                                                                                                                                                                                                                                                                                                                                                                                                                                                                                                                                                                                                                                                                                                                                                                                                                                                                                                                                                                                                                                                                                                                                                                                                                                                                                                                                                                                                                                                                                                                                                                      |                           |                     |                                   |                                   |                                                                                                                                                                                                                                                                                                                                                                                                                                                                                         |      |                                    |    |     |                                     |    |      |                                       |     |      |  |                  |                     |                          |     |      |
| Precarious to precarious                                                     | 148                                                               | 5018                                                          |                                                                                                                                                                                                                                                                                                                                                                                                                                                                                                                                                                                                                                                                                                                                                                                                                                                                                                                                                                                                                                                                                                                                                                                                                                                                                                                                                                                                                                                                                                                     |                                                                                                                                                                                                         |                         |                          |                     |                            |                     |                            |                           |                              |                      |                                                                                                                                                                                                                                                                                                                                                                                                                                                                                                                                                                                                                                                                                                                                                                                                                                                                                                                                                                                                                                                                                                                                                                                                                                                                                                                                                                                                                                                                                                                                                                                                                                                                                                                                                                                                                                                                                                                                                                                                                                                                                                      |                           |                     |                                   |                                   |                                                                                                                                                                                                                                                                                                                                                                                                                                                                                         |      |                                    |    |     |                                     |    |      |                                       |     |      |  |                  |                     |                          |     |      |





| Reference/<br>Study design                                | Data source/<br>Population<br>range                                                                    | Poor/bad job<br>definition<br>Outcome                                                                                                                                       | Results from paper                                                                                                                                                                                                | Is any job better than no job?<br>Where OR has been calculated by OES exposure is bad/poor<br>job, is unadjusted and data used to calculate may have<br>been derived from percentages in study results tables                                                                                                                                                                                                                                                                                                                                                                                                                                                                                                                                                                                                                                                                                                                                                                                                                                                                                                                                                                                                                                                                                                                                                                                                                                                                                                                                                                                                                                                                                                                                                                                                                                                                                                                                                                                                                                                                                                                                                                                                                                                                                                                                                                                                                                                                                                                                                                                                                                                                                                                                                                                                                                                                                                                                                                                                                                                                                                                                                                                                                                                                                                                                                                                                                                                                                                                                                                                                              |                        |                          |                                                      |                     |                   |                       |                        |                     |                  |                     |                     |                     |               |                     |                       |                      |                      |                        |                        |                        |         |                        |                        |                        |         |                        |                        |                        |          |                        |                        |                        |                              |                        |                        |                        |                              |                        |                        |                        |          |                     |                       |                     |  |                   |                       |                                       |               |      |                    |            |     |  |                  |                     |                                       |            |      |                    |            |     |  |               |                  |                                       |              |      |                    |            |     |  |                       |                         |                                       |               |      |                    |             |     |
|-----------------------------------------------------------|--------------------------------------------------------------------------------------------------------|-----------------------------------------------------------------------------------------------------------------------------------------------------------------------------|-------------------------------------------------------------------------------------------------------------------------------------------------------------------------------------------------------------------|----------------------------------------------------------------------------------------------------------------------------------------------------------------------------------------------------------------------------------------------------------------------------------------------------------------------------------------------------------------------------------------------------------------------------------------------------------------------------------------------------------------------------------------------------------------------------------------------------------------------------------------------------------------------------------------------------------------------------------------------------------------------------------------------------------------------------------------------------------------------------------------------------------------------------------------------------------------------------------------------------------------------------------------------------------------------------------------------------------------------------------------------------------------------------------------------------------------------------------------------------------------------------------------------------------------------------------------------------------------------------------------------------------------------------------------------------------------------------------------------------------------------------------------------------------------------------------------------------------------------------------------------------------------------------------------------------------------------------------------------------------------------------------------------------------------------------------------------------------------------------------------------------------------------------------------------------------------------------------------------------------------------------------------------------------------------------------------------------------------------------------------------------------------------------------------------------------------------------------------------------------------------------------------------------------------------------------------------------------------------------------------------------------------------------------------------------------------------------------------------------------------------------------------------------------------------------------------------------------------------------------------------------------------------------------------------------------------------------------------------------------------------------------------------------------------------------------------------------------------------------------------------------------------------------------------------------------------------------------------------------------------------------------------------------------------------------------------------------------------------------------------------------------------------------------------------------------------------------------------------------------------------------------------------------------------------------------------------------------------------------------------------------------------------------------------------------------------------------------------------------------------------------------------------------------------------------------------------------------------------------|------------------------|--------------------------|------------------------------------------------------|---------------------|-------------------|-----------------------|------------------------|---------------------|------------------|---------------------|---------------------|---------------------|---------------|---------------------|-----------------------|----------------------|----------------------|------------------------|------------------------|------------------------|---------|------------------------|------------------------|------------------------|---------|------------------------|------------------------|------------------------|----------|------------------------|------------------------|------------------------|------------------------------|------------------------|------------------------|------------------------|------------------------------|------------------------|------------------------|------------------------|----------|---------------------|-----------------------|---------------------|--|-------------------|-----------------------|---------------------------------------|---------------|------|--------------------|------------|-----|--|------------------|---------------------|---------------------------------------|------------|------|--------------------|------------|-----|--|---------------|------------------|---------------------------------------|--------------|------|--------------------|------------|-----|--|-----------------------|-------------------------|---------------------------------------|---------------|------|--------------------|-------------|-----|
|                                                           |                                                                                                        |                                                                                                                                                                             |                                                                                                                                                                                                                   | <table border="1"> <tr> <td>Unemployed<br/>(n=3483)</td> <td>148</td> <td>3335</td> </tr> </table> <p>Odds ratio 0.56, 95% CI 0.44 to 0.70, p &lt;0.001</p>                                                                                                                                                                                                                                                                                                                                                                                                                                                                                                                                                                                                                                                                                                                                                                                                                                                                                                                                                                                                                                                                                                                                                                                                                                                                                                                                                                                                                                                                                                                                                                                                                                                                                                                                                                                                                                                                                                                                                                                                                                                                                                                                                                                                                                                                                                                                                                                                                                                                                                                                                                                                                                                                                                                                                                                                                                                                                                                                                                                                                                                                                                                                                                                                                                                                                                                                                                                                                                                                | Unemployed<br>(n=3483) | 148                      | 3335                                                 |                     |                   |                       |                        |                     |                  |                     |                     |                     |               |                     |                       |                      |                      |                        |                        |                        |         |                        |                        |                        |         |                        |                        |                        |          |                        |                        |                        |                              |                        |                        |                        |                              |                        |                        |                        |          |                     |                       |                     |  |                   |                       |                                       |               |      |                    |            |     |  |                  |                     |                                       |            |      |                    |            |     |  |               |                  |                                       |              |      |                    |            |     |  |                       |                         |                                       |               |      |                    |             |     |
| Unemployed<br>(n=3483)                                    | 148                                                                                                    | 3335                                                                                                                                                                        |                                                                                                                                                                                                                   |                                                                                                                                                                                                                                                                                                                                                                                                                                                                                                                                                                                                                                                                                                                                                                                                                                                                                                                                                                                                                                                                                                                                                                                                                                                                                                                                                                                                                                                                                                                                                                                                                                                                                                                                                                                                                                                                                                                                                                                                                                                                                                                                                                                                                                                                                                                                                                                                                                                                                                                                                                                                                                                                                                                                                                                                                                                                                                                                                                                                                                                                                                                                                                                                                                                                                                                                                                                                                                                                                                                                                                                                                            |                        |                          |                                                      |                     |                   |                       |                        |                     |                  |                     |                     |                     |               |                     |                       |                      |                      |                        |                        |                        |         |                        |                        |                        |         |                        |                        |                        |          |                        |                        |                        |                              |                        |                        |                        |                              |                        |                        |                        |          |                     |                       |                     |  |                   |                       |                                       |               |      |                    |            |     |  |                  |                     |                                       |            |      |                    |            |     |  |               |                  |                                       |              |      |                    |            |     |  |                       |                         |                                       |               |      |                    |             |     |
| Matilla-Santander<br>N et al. 2020<br><br>Cross sectional | European<br>Working<br>Conditions<br>Survey, 6 <sup>th</sup> wave,<br>2015<br><br>15 years and<br>over | Precarious<br>employment;<br>temporariness, not<br>being able to<br>exercise rights,<br>vulnerability,<br>disempowerment and<br>wages<br><br>Bad health, health<br>problems | Prevalence of health-related outcomes among highly precariously, not precariously employed and unemployed individuals in Europe in 2015 (overall quartiles % and 95% confidence intervals, unadjusted prevalence) | <table border="1"> <thead> <tr> <th></th> <th>Non-precious<br/>n=13,663</th> <th>Highly precarious<br/>4<sup>th</sup> quartile n=4769</th> <th>Unemployed<br/>n=253</th> </tr> </thead> <tbody> <tr> <td>Bad health status</td> <td>20.8 (16.79 to 23.82)</td> <td>24.08 (20.06 to 28.61)</td> <td>33.3 (24.4 to 43.5)</td> </tr> <tr> <td>Hearing problems</td> <td>4.10 (3.03 to 5.54)</td> <td>5.80 (4.82 to 6.96)</td> <td>4.09 (1.90 to 8.55)</td> </tr> <tr> <td>Skin problems</td> <td>6.58 (5.28 to 8.18)</td> <td>10.91 (9.07 to 13.07)</td> <td>9.13 (5.21 to 15.53)</td> </tr> <tr> <td>Headaches, eyestrain</td> <td>37.18 (30.13 to 44.83)</td> <td>44.89 (37.08 to 52.96)</td> <td>36.23 (29.20 to 43.89)</td> </tr> <tr> <td>Anxiety</td> <td>14.21 (10.29 to 19.29)</td> <td>22.19 (14.47 to 32.46)</td> <td>21.14 (14.63 to 29.54)</td> </tr> <tr> <td>Fatigue</td> <td>35.91 (27.98 to 44.69)</td> <td>48.27 (36.49 to 60.25)</td> <td>38.95 (30.43 to 48.20)</td> </tr> <tr> <td>Backache</td> <td>41.63 (37.54 to 45.84)</td> <td>52.56 (47.22 to 57.85)</td> <td>47.20 (39.32 to 55.22)</td> </tr> <tr> <td>Muscular pain in upper limbs</td> <td>39.46 (35.40 to 44.65)</td> <td>50.75 (45.12 to 56.36)</td> <td>40.28 (33.07 to 47.93)</td> </tr> <tr> <td>Muscular pain in lower limbs</td> <td>28.92 (23.90 to 34.51)</td> <td>37.46 (32.86 to 42.30)</td> <td>35.54 (28.94 to 42.74)</td> </tr> <tr> <td>Injuries</td> <td>6.58 (5.29 to 8.17)</td> <td>10.83 (8.63 to 13.51)</td> <td>6.18 (3.59 to 10.4)</td> </tr> </tbody> </table> <p>Yes: Those in highly precarious employment were significantly less likely to report bad health status than those who were unemployed.</p> <p>No: Those in highly precarious employment were more likely to report hearing problems, skin problems, anxiety, backache and muscular pain in lower limbs. These differences are not statistically significant</p> <p>No: Those in highly precarious employment were significantly more likely to report headaches/eyestrain, fatigue, muscular pain in upper limbs and injuries.</p> <p>Table 2, page 7</p> <table border="1"> <thead> <tr> <th></th> <th>Bad health status</th> <th>Not bad health status</th> </tr> </thead> <tbody> <tr> <td>Highly precarious employment (n=4769)</td> <td>(24.08%) 1148</td> <td>3621</td> </tr> <tr> <td>Unemployed (n=253)</td> <td>(33.3%) 84</td> <td>169</td> </tr> </tbody> </table> <p>Odds ratio 0.64, 95% CI 0.49 to 0.84, p=0.0011</p> <table border="1"> <thead> <tr> <th></th> <th>Hearing problems</th> <th>No hearing problems</th> </tr> </thead> <tbody> <tr> <td>Highly precarious employment (n=4769)</td> <td>(5.8%) 277</td> <td>4492</td> </tr> <tr> <td>Unemployed (n=253)</td> <td>(4.09%) 10</td> <td>243</td> </tr> </tbody> </table> <p>Odds ratio 1.50, 95% CI 0.79 to 2.85, p=0.2183</p> <table border="1"> <thead> <tr> <th></th> <th>Skin problems</th> <th>No skin problems</th> </tr> </thead> <tbody> <tr> <td>Highly precarious employment (n=4769)</td> <td>(10.91%) 520</td> <td>4249</td> </tr> <tr> <td>Unemployed (n=253)</td> <td>(9.13%) 23</td> <td>230</td> </tr> </tbody> </table> <p>Odds ratio 1.22, 95% CI 0.79 to 1.90 p=0.3663</p> <table border="1"> <thead> <tr> <th></th> <th>Headaches, eye strain</th> <th>No headaches, eyestrain</th> </tr> </thead> <tbody> <tr> <td>Highly precarious employment (n=4769)</td> <td>(44.89%) 2150</td> <td>2619</td> </tr> <tr> <td>Unemployed (n=253)</td> <td>(36.23%) 92</td> <td>161</td> </tr> </tbody> </table> <p>Odds ratio 1.44, 95% CI 1.11 to 1.87 p=0.0068</p> |                        | Non-precious<br>n=13,663 | Highly precarious<br>4 <sup>th</sup> quartile n=4769 | Unemployed<br>n=253 | Bad health status | 20.8 (16.79 to 23.82) | 24.08 (20.06 to 28.61) | 33.3 (24.4 to 43.5) | Hearing problems | 4.10 (3.03 to 5.54) | 5.80 (4.82 to 6.96) | 4.09 (1.90 to 8.55) | Skin problems | 6.58 (5.28 to 8.18) | 10.91 (9.07 to 13.07) | 9.13 (5.21 to 15.53) | Headaches, eyestrain | 37.18 (30.13 to 44.83) | 44.89 (37.08 to 52.96) | 36.23 (29.20 to 43.89) | Anxiety | 14.21 (10.29 to 19.29) | 22.19 (14.47 to 32.46) | 21.14 (14.63 to 29.54) | Fatigue | 35.91 (27.98 to 44.69) | 48.27 (36.49 to 60.25) | 38.95 (30.43 to 48.20) | Backache | 41.63 (37.54 to 45.84) | 52.56 (47.22 to 57.85) | 47.20 (39.32 to 55.22) | Muscular pain in upper limbs | 39.46 (35.40 to 44.65) | 50.75 (45.12 to 56.36) | 40.28 (33.07 to 47.93) | Muscular pain in lower limbs | 28.92 (23.90 to 34.51) | 37.46 (32.86 to 42.30) | 35.54 (28.94 to 42.74) | Injuries | 6.58 (5.29 to 8.17) | 10.83 (8.63 to 13.51) | 6.18 (3.59 to 10.4) |  | Bad health status | Not bad health status | Highly precarious employment (n=4769) | (24.08%) 1148 | 3621 | Unemployed (n=253) | (33.3%) 84 | 169 |  | Hearing problems | No hearing problems | Highly precarious employment (n=4769) | (5.8%) 277 | 4492 | Unemployed (n=253) | (4.09%) 10 | 243 |  | Skin problems | No skin problems | Highly precarious employment (n=4769) | (10.91%) 520 | 4249 | Unemployed (n=253) | (9.13%) 23 | 230 |  | Headaches, eye strain | No headaches, eyestrain | Highly precarious employment (n=4769) | (44.89%) 2150 | 2619 | Unemployed (n=253) | (36.23%) 92 | 161 |
|                                                           | Non-precious<br>n=13,663                                                                               | Highly precarious<br>4 <sup>th</sup> quartile n=4769                                                                                                                        | Unemployed<br>n=253                                                                                                                                                                                               |                                                                                                                                                                                                                                                                                                                                                                                                                                                                                                                                                                                                                                                                                                                                                                                                                                                                                                                                                                                                                                                                                                                                                                                                                                                                                                                                                                                                                                                                                                                                                                                                                                                                                                                                                                                                                                                                                                                                                                                                                                                                                                                                                                                                                                                                                                                                                                                                                                                                                                                                                                                                                                                                                                                                                                                                                                                                                                                                                                                                                                                                                                                                                                                                                                                                                                                                                                                                                                                                                                                                                                                                                            |                        |                          |                                                      |                     |                   |                       |                        |                     |                  |                     |                     |                     |               |                     |                       |                      |                      |                        |                        |                        |         |                        |                        |                        |         |                        |                        |                        |          |                        |                        |                        |                              |                        |                        |                        |                              |                        |                        |                        |          |                     |                       |                     |  |                   |                       |                                       |               |      |                    |            |     |  |                  |                     |                                       |            |      |                    |            |     |  |               |                  |                                       |              |      |                    |            |     |  |                       |                         |                                       |               |      |                    |             |     |
| Bad health status                                         | 20.8 (16.79 to 23.82)                                                                                  | 24.08 (20.06 to 28.61)                                                                                                                                                      | 33.3 (24.4 to 43.5)                                                                                                                                                                                               |                                                                                                                                                                                                                                                                                                                                                                                                                                                                                                                                                                                                                                                                                                                                                                                                                                                                                                                                                                                                                                                                                                                                                                                                                                                                                                                                                                                                                                                                                                                                                                                                                                                                                                                                                                                                                                                                                                                                                                                                                                                                                                                                                                                                                                                                                                                                                                                                                                                                                                                                                                                                                                                                                                                                                                                                                                                                                                                                                                                                                                                                                                                                                                                                                                                                                                                                                                                                                                                                                                                                                                                                                            |                        |                          |                                                      |                     |                   |                       |                        |                     |                  |                     |                     |                     |               |                     |                       |                      |                      |                        |                        |                        |         |                        |                        |                        |         |                        |                        |                        |          |                        |                        |                        |                              |                        |                        |                        |                              |                        |                        |                        |          |                     |                       |                     |  |                   |                       |                                       |               |      |                    |            |     |  |                  |                     |                                       |            |      |                    |            |     |  |               |                  |                                       |              |      |                    |            |     |  |                       |                         |                                       |               |      |                    |             |     |
| Hearing problems                                          | 4.10 (3.03 to 5.54)                                                                                    | 5.80 (4.82 to 6.96)                                                                                                                                                         | 4.09 (1.90 to 8.55)                                                                                                                                                                                               |                                                                                                                                                                                                                                                                                                                                                                                                                                                                                                                                                                                                                                                                                                                                                                                                                                                                                                                                                                                                                                                                                                                                                                                                                                                                                                                                                                                                                                                                                                                                                                                                                                                                                                                                                                                                                                                                                                                                                                                                                                                                                                                                                                                                                                                                                                                                                                                                                                                                                                                                                                                                                                                                                                                                                                                                                                                                                                                                                                                                                                                                                                                                                                                                                                                                                                                                                                                                                                                                                                                                                                                                                            |                        |                          |                                                      |                     |                   |                       |                        |                     |                  |                     |                     |                     |               |                     |                       |                      |                      |                        |                        |                        |         |                        |                        |                        |         |                        |                        |                        |          |                        |                        |                        |                              |                        |                        |                        |                              |                        |                        |                        |          |                     |                       |                     |  |                   |                       |                                       |               |      |                    |            |     |  |                  |                     |                                       |            |      |                    |            |     |  |               |                  |                                       |              |      |                    |            |     |  |                       |                         |                                       |               |      |                    |             |     |
| Skin problems                                             | 6.58 (5.28 to 8.18)                                                                                    | 10.91 (9.07 to 13.07)                                                                                                                                                       | 9.13 (5.21 to 15.53)                                                                                                                                                                                              |                                                                                                                                                                                                                                                                                                                                                                                                                                                                                                                                                                                                                                                                                                                                                                                                                                                                                                                                                                                                                                                                                                                                                                                                                                                                                                                                                                                                                                                                                                                                                                                                                                                                                                                                                                                                                                                                                                                                                                                                                                                                                                                                                                                                                                                                                                                                                                                                                                                                                                                                                                                                                                                                                                                                                                                                                                                                                                                                                                                                                                                                                                                                                                                                                                                                                                                                                                                                                                                                                                                                                                                                                            |                        |                          |                                                      |                     |                   |                       |                        |                     |                  |                     |                     |                     |               |                     |                       |                      |                      |                        |                        |                        |         |                        |                        |                        |         |                        |                        |                        |          |                        |                        |                        |                              |                        |                        |                        |                              |                        |                        |                        |          |                     |                       |                     |  |                   |                       |                                       |               |      |                    |            |     |  |                  |                     |                                       |            |      |                    |            |     |  |               |                  |                                       |              |      |                    |            |     |  |                       |                         |                                       |               |      |                    |             |     |
| Headaches, eyestrain                                      | 37.18 (30.13 to 44.83)                                                                                 | 44.89 (37.08 to 52.96)                                                                                                                                                      | 36.23 (29.20 to 43.89)                                                                                                                                                                                            |                                                                                                                                                                                                                                                                                                                                                                                                                                                                                                                                                                                                                                                                                                                                                                                                                                                                                                                                                                                                                                                                                                                                                                                                                                                                                                                                                                                                                                                                                                                                                                                                                                                                                                                                                                                                                                                                                                                                                                                                                                                                                                                                                                                                                                                                                                                                                                                                                                                                                                                                                                                                                                                                                                                                                                                                                                                                                                                                                                                                                                                                                                                                                                                                                                                                                                                                                                                                                                                                                                                                                                                                                            |                        |                          |                                                      |                     |                   |                       |                        |                     |                  |                     |                     |                     |               |                     |                       |                      |                      |                        |                        |                        |         |                        |                        |                        |         |                        |                        |                        |          |                        |                        |                        |                              |                        |                        |                        |                              |                        |                        |                        |          |                     |                       |                     |  |                   |                       |                                       |               |      |                    |            |     |  |                  |                     |                                       |            |      |                    |            |     |  |               |                  |                                       |              |      |                    |            |     |  |                       |                         |                                       |               |      |                    |             |     |
| Anxiety                                                   | 14.21 (10.29 to 19.29)                                                                                 | 22.19 (14.47 to 32.46)                                                                                                                                                      | 21.14 (14.63 to 29.54)                                                                                                                                                                                            |                                                                                                                                                                                                                                                                                                                                                                                                                                                                                                                                                                                                                                                                                                                                                                                                                                                                                                                                                                                                                                                                                                                                                                                                                                                                                                                                                                                                                                                                                                                                                                                                                                                                                                                                                                                                                                                                                                                                                                                                                                                                                                                                                                                                                                                                                                                                                                                                                                                                                                                                                                                                                                                                                                                                                                                                                                                                                                                                                                                                                                                                                                                                                                                                                                                                                                                                                                                                                                                                                                                                                                                                                            |                        |                          |                                                      |                     |                   |                       |                        |                     |                  |                     |                     |                     |               |                     |                       |                      |                      |                        |                        |                        |         |                        |                        |                        |         |                        |                        |                        |          |                        |                        |                        |                              |                        |                        |                        |                              |                        |                        |                        |          |                     |                       |                     |  |                   |                       |                                       |               |      |                    |            |     |  |                  |                     |                                       |            |      |                    |            |     |  |               |                  |                                       |              |      |                    |            |     |  |                       |                         |                                       |               |      |                    |             |     |
| Fatigue                                                   | 35.91 (27.98 to 44.69)                                                                                 | 48.27 (36.49 to 60.25)                                                                                                                                                      | 38.95 (30.43 to 48.20)                                                                                                                                                                                            |                                                                                                                                                                                                                                                                                                                                                                                                                                                                                                                                                                                                                                                                                                                                                                                                                                                                                                                                                                                                                                                                                                                                                                                                                                                                                                                                                                                                                                                                                                                                                                                                                                                                                                                                                                                                                                                                                                                                                                                                                                                                                                                                                                                                                                                                                                                                                                                                                                                                                                                                                                                                                                                                                                                                                                                                                                                                                                                                                                                                                                                                                                                                                                                                                                                                                                                                                                                                                                                                                                                                                                                                                            |                        |                          |                                                      |                     |                   |                       |                        |                     |                  |                     |                     |                     |               |                     |                       |                      |                      |                        |                        |                        |         |                        |                        |                        |         |                        |                        |                        |          |                        |                        |                        |                              |                        |                        |                        |                              |                        |                        |                        |          |                     |                       |                     |  |                   |                       |                                       |               |      |                    |            |     |  |                  |                     |                                       |            |      |                    |            |     |  |               |                  |                                       |              |      |                    |            |     |  |                       |                         |                                       |               |      |                    |             |     |
| Backache                                                  | 41.63 (37.54 to 45.84)                                                                                 | 52.56 (47.22 to 57.85)                                                                                                                                                      | 47.20 (39.32 to 55.22)                                                                                                                                                                                            |                                                                                                                                                                                                                                                                                                                                                                                                                                                                                                                                                                                                                                                                                                                                                                                                                                                                                                                                                                                                                                                                                                                                                                                                                                                                                                                                                                                                                                                                                                                                                                                                                                                                                                                                                                                                                                                                                                                                                                                                                                                                                                                                                                                                                                                                                                                                                                                                                                                                                                                                                                                                                                                                                                                                                                                                                                                                                                                                                                                                                                                                                                                                                                                                                                                                                                                                                                                                                                                                                                                                                                                                                            |                        |                          |                                                      |                     |                   |                       |                        |                     |                  |                     |                     |                     |               |                     |                       |                      |                      |                        |                        |                        |         |                        |                        |                        |         |                        |                        |                        |          |                        |                        |                        |                              |                        |                        |                        |                              |                        |                        |                        |          |                     |                       |                     |  |                   |                       |                                       |               |      |                    |            |     |  |                  |                     |                                       |            |      |                    |            |     |  |               |                  |                                       |              |      |                    |            |     |  |                       |                         |                                       |               |      |                    |             |     |
| Muscular pain in upper limbs                              | 39.46 (35.40 to 44.65)                                                                                 | 50.75 (45.12 to 56.36)                                                                                                                                                      | 40.28 (33.07 to 47.93)                                                                                                                                                                                            |                                                                                                                                                                                                                                                                                                                                                                                                                                                                                                                                                                                                                                                                                                                                                                                                                                                                                                                                                                                                                                                                                                                                                                                                                                                                                                                                                                                                                                                                                                                                                                                                                                                                                                                                                                                                                                                                                                                                                                                                                                                                                                                                                                                                                                                                                                                                                                                                                                                                                                                                                                                                                                                                                                                                                                                                                                                                                                                                                                                                                                                                                                                                                                                                                                                                                                                                                                                                                                                                                                                                                                                                                            |                        |                          |                                                      |                     |                   |                       |                        |                     |                  |                     |                     |                     |               |                     |                       |                      |                      |                        |                        |                        |         |                        |                        |                        |         |                        |                        |                        |          |                        |                        |                        |                              |                        |                        |                        |                              |                        |                        |                        |          |                     |                       |                     |  |                   |                       |                                       |               |      |                    |            |     |  |                  |                     |                                       |            |      |                    |            |     |  |               |                  |                                       |              |      |                    |            |     |  |                       |                         |                                       |               |      |                    |             |     |
| Muscular pain in lower limbs                              | 28.92 (23.90 to 34.51)                                                                                 | 37.46 (32.86 to 42.30)                                                                                                                                                      | 35.54 (28.94 to 42.74)                                                                                                                                                                                            |                                                                                                                                                                                                                                                                                                                                                                                                                                                                                                                                                                                                                                                                                                                                                                                                                                                                                                                                                                                                                                                                                                                                                                                                                                                                                                                                                                                                                                                                                                                                                                                                                                                                                                                                                                                                                                                                                                                                                                                                                                                                                                                                                                                                                                                                                                                                                                                                                                                                                                                                                                                                                                                                                                                                                                                                                                                                                                                                                                                                                                                                                                                                                                                                                                                                                                                                                                                                                                                                                                                                                                                                                            |                        |                          |                                                      |                     |                   |                       |                        |                     |                  |                     |                     |                     |               |                     |                       |                      |                      |                        |                        |                        |         |                        |                        |                        |         |                        |                        |                        |          |                        |                        |                        |                              |                        |                        |                        |                              |                        |                        |                        |          |                     |                       |                     |  |                   |                       |                                       |               |      |                    |            |     |  |                  |                     |                                       |            |      |                    |            |     |  |               |                  |                                       |              |      |                    |            |     |  |                       |                         |                                       |               |      |                    |             |     |
| Injuries                                                  | 6.58 (5.29 to 8.17)                                                                                    | 10.83 (8.63 to 13.51)                                                                                                                                                       | 6.18 (3.59 to 10.4)                                                                                                                                                                                               |                                                                                                                                                                                                                                                                                                                                                                                                                                                                                                                                                                                                                                                                                                                                                                                                                                                                                                                                                                                                                                                                                                                                                                                                                                                                                                                                                                                                                                                                                                                                                                                                                                                                                                                                                                                                                                                                                                                                                                                                                                                                                                                                                                                                                                                                                                                                                                                                                                                                                                                                                                                                                                                                                                                                                                                                                                                                                                                                                                                                                                                                                                                                                                                                                                                                                                                                                                                                                                                                                                                                                                                                                            |                        |                          |                                                      |                     |                   |                       |                        |                     |                  |                     |                     |                     |               |                     |                       |                      |                      |                        |                        |                        |         |                        |                        |                        |         |                        |                        |                        |          |                        |                        |                        |                              |                        |                        |                        |                              |                        |                        |                        |          |                     |                       |                     |  |                   |                       |                                       |               |      |                    |            |     |  |                  |                     |                                       |            |      |                    |            |     |  |               |                  |                                       |              |      |                    |            |     |  |                       |                         |                                       |               |      |                    |             |     |
|                                                           | Bad health status                                                                                      | Not bad health status                                                                                                                                                       |                                                                                                                                                                                                                   |                                                                                                                                                                                                                                                                                                                                                                                                                                                                                                                                                                                                                                                                                                                                                                                                                                                                                                                                                                                                                                                                                                                                                                                                                                                                                                                                                                                                                                                                                                                                                                                                                                                                                                                                                                                                                                                                                                                                                                                                                                                                                                                                                                                                                                                                                                                                                                                                                                                                                                                                                                                                                                                                                                                                                                                                                                                                                                                                                                                                                                                                                                                                                                                                                                                                                                                                                                                                                                                                                                                                                                                                                            |                        |                          |                                                      |                     |                   |                       |                        |                     |                  |                     |                     |                     |               |                     |                       |                      |                      |                        |                        |                        |         |                        |                        |                        |         |                        |                        |                        |          |                        |                        |                        |                              |                        |                        |                        |                              |                        |                        |                        |          |                     |                       |                     |  |                   |                       |                                       |               |      |                    |            |     |  |                  |                     |                                       |            |      |                    |            |     |  |               |                  |                                       |              |      |                    |            |     |  |                       |                         |                                       |               |      |                    |             |     |
| Highly precarious employment (n=4769)                     | (24.08%) 1148                                                                                          | 3621                                                                                                                                                                        |                                                                                                                                                                                                                   |                                                                                                                                                                                                                                                                                                                                                                                                                                                                                                                                                                                                                                                                                                                                                                                                                                                                                                                                                                                                                                                                                                                                                                                                                                                                                                                                                                                                                                                                                                                                                                                                                                                                                                                                                                                                                                                                                                                                                                                                                                                                                                                                                                                                                                                                                                                                                                                                                                                                                                                                                                                                                                                                                                                                                                                                                                                                                                                                                                                                                                                                                                                                                                                                                                                                                                                                                                                                                                                                                                                                                                                                                            |                        |                          |                                                      |                     |                   |                       |                        |                     |                  |                     |                     |                     |               |                     |                       |                      |                      |                        |                        |                        |         |                        |                        |                        |         |                        |                        |                        |          |                        |                        |                        |                              |                        |                        |                        |                              |                        |                        |                        |          |                     |                       |                     |  |                   |                       |                                       |               |      |                    |            |     |  |                  |                     |                                       |            |      |                    |            |     |  |               |                  |                                       |              |      |                    |            |     |  |                       |                         |                                       |               |      |                    |             |     |
| Unemployed (n=253)                                        | (33.3%) 84                                                                                             | 169                                                                                                                                                                         |                                                                                                                                                                                                                   |                                                                                                                                                                                                                                                                                                                                                                                                                                                                                                                                                                                                                                                                                                                                                                                                                                                                                                                                                                                                                                                                                                                                                                                                                                                                                                                                                                                                                                                                                                                                                                                                                                                                                                                                                                                                                                                                                                                                                                                                                                                                                                                                                                                                                                                                                                                                                                                                                                                                                                                                                                                                                                                                                                                                                                                                                                                                                                                                                                                                                                                                                                                                                                                                                                                                                                                                                                                                                                                                                                                                                                                                                            |                        |                          |                                                      |                     |                   |                       |                        |                     |                  |                     |                     |                     |               |                     |                       |                      |                      |                        |                        |                        |         |                        |                        |                        |         |                        |                        |                        |          |                        |                        |                        |                              |                        |                        |                        |                              |                        |                        |                        |          |                     |                       |                     |  |                   |                       |                                       |               |      |                    |            |     |  |                  |                     |                                       |            |      |                    |            |     |  |               |                  |                                       |              |      |                    |            |     |  |                       |                         |                                       |               |      |                    |             |     |
|                                                           | Hearing problems                                                                                       | No hearing problems                                                                                                                                                         |                                                                                                                                                                                                                   |                                                                                                                                                                                                                                                                                                                                                                                                                                                                                                                                                                                                                                                                                                                                                                                                                                                                                                                                                                                                                                                                                                                                                                                                                                                                                                                                                                                                                                                                                                                                                                                                                                                                                                                                                                                                                                                                                                                                                                                                                                                                                                                                                                                                                                                                                                                                                                                                                                                                                                                                                                                                                                                                                                                                                                                                                                                                                                                                                                                                                                                                                                                                                                                                                                                                                                                                                                                                                                                                                                                                                                                                                            |                        |                          |                                                      |                     |                   |                       |                        |                     |                  |                     |                     |                     |               |                     |                       |                      |                      |                        |                        |                        |         |                        |                        |                        |         |                        |                        |                        |          |                        |                        |                        |                              |                        |                        |                        |                              |                        |                        |                        |          |                     |                       |                     |  |                   |                       |                                       |               |      |                    |            |     |  |                  |                     |                                       |            |      |                    |            |     |  |               |                  |                                       |              |      |                    |            |     |  |                       |                         |                                       |               |      |                    |             |     |
| Highly precarious employment (n=4769)                     | (5.8%) 277                                                                                             | 4492                                                                                                                                                                        |                                                                                                                                                                                                                   |                                                                                                                                                                                                                                                                                                                                                                                                                                                                                                                                                                                                                                                                                                                                                                                                                                                                                                                                                                                                                                                                                                                                                                                                                                                                                                                                                                                                                                                                                                                                                                                                                                                                                                                                                                                                                                                                                                                                                                                                                                                                                                                                                                                                                                                                                                                                                                                                                                                                                                                                                                                                                                                                                                                                                                                                                                                                                                                                                                                                                                                                                                                                                                                                                                                                                                                                                                                                                                                                                                                                                                                                                            |                        |                          |                                                      |                     |                   |                       |                        |                     |                  |                     |                     |                     |               |                     |                       |                      |                      |                        |                        |                        |         |                        |                        |                        |         |                        |                        |                        |          |                        |                        |                        |                              |                        |                        |                        |                              |                        |                        |                        |          |                     |                       |                     |  |                   |                       |                                       |               |      |                    |            |     |  |                  |                     |                                       |            |      |                    |            |     |  |               |                  |                                       |              |      |                    |            |     |  |                       |                         |                                       |               |      |                    |             |     |
| Unemployed (n=253)                                        | (4.09%) 10                                                                                             | 243                                                                                                                                                                         |                                                                                                                                                                                                                   |                                                                                                                                                                                                                                                                                                                                                                                                                                                                                                                                                                                                                                                                                                                                                                                                                                                                                                                                                                                                                                                                                                                                                                                                                                                                                                                                                                                                                                                                                                                                                                                                                                                                                                                                                                                                                                                                                                                                                                                                                                                                                                                                                                                                                                                                                                                                                                                                                                                                                                                                                                                                                                                                                                                                                                                                                                                                                                                                                                                                                                                                                                                                                                                                                                                                                                                                                                                                                                                                                                                                                                                                                            |                        |                          |                                                      |                     |                   |                       |                        |                     |                  |                     |                     |                     |               |                     |                       |                      |                      |                        |                        |                        |         |                        |                        |                        |         |                        |                        |                        |          |                        |                        |                        |                              |                        |                        |                        |                              |                        |                        |                        |          |                     |                       |                     |  |                   |                       |                                       |               |      |                    |            |     |  |                  |                     |                                       |            |      |                    |            |     |  |               |                  |                                       |              |      |                    |            |     |  |                       |                         |                                       |               |      |                    |             |     |
|                                                           | Skin problems                                                                                          | No skin problems                                                                                                                                                            |                                                                                                                                                                                                                   |                                                                                                                                                                                                                                                                                                                                                                                                                                                                                                                                                                                                                                                                                                                                                                                                                                                                                                                                                                                                                                                                                                                                                                                                                                                                                                                                                                                                                                                                                                                                                                                                                                                                                                                                                                                                                                                                                                                                                                                                                                                                                                                                                                                                                                                                                                                                                                                                                                                                                                                                                                                                                                                                                                                                                                                                                                                                                                                                                                                                                                                                                                                                                                                                                                                                                                                                                                                                                                                                                                                                                                                                                            |                        |                          |                                                      |                     |                   |                       |                        |                     |                  |                     |                     |                     |               |                     |                       |                      |                      |                        |                        |                        |         |                        |                        |                        |         |                        |                        |                        |          |                        |                        |                        |                              |                        |                        |                        |                              |                        |                        |                        |          |                     |                       |                     |  |                   |                       |                                       |               |      |                    |            |     |  |                  |                     |                                       |            |      |                    |            |     |  |               |                  |                                       |              |      |                    |            |     |  |                       |                         |                                       |               |      |                    |             |     |
| Highly precarious employment (n=4769)                     | (10.91%) 520                                                                                           | 4249                                                                                                                                                                        |                                                                                                                                                                                                                   |                                                                                                                                                                                                                                                                                                                                                                                                                                                                                                                                                                                                                                                                                                                                                                                                                                                                                                                                                                                                                                                                                                                                                                                                                                                                                                                                                                                                                                                                                                                                                                                                                                                                                                                                                                                                                                                                                                                                                                                                                                                                                                                                                                                                                                                                                                                                                                                                                                                                                                                                                                                                                                                                                                                                                                                                                                                                                                                                                                                                                                                                                                                                                                                                                                                                                                                                                                                                                                                                                                                                                                                                                            |                        |                          |                                                      |                     |                   |                       |                        |                     |                  |                     |                     |                     |               |                     |                       |                      |                      |                        |                        |                        |         |                        |                        |                        |         |                        |                        |                        |          |                        |                        |                        |                              |                        |                        |                        |                              |                        |                        |                        |          |                     |                       |                     |  |                   |                       |                                       |               |      |                    |            |     |  |                  |                     |                                       |            |      |                    |            |     |  |               |                  |                                       |              |      |                    |            |     |  |                       |                         |                                       |               |      |                    |             |     |
| Unemployed (n=253)                                        | (9.13%) 23                                                                                             | 230                                                                                                                                                                         |                                                                                                                                                                                                                   |                                                                                                                                                                                                                                                                                                                                                                                                                                                                                                                                                                                                                                                                                                                                                                                                                                                                                                                                                                                                                                                                                                                                                                                                                                                                                                                                                                                                                                                                                                                                                                                                                                                                                                                                                                                                                                                                                                                                                                                                                                                                                                                                                                                                                                                                                                                                                                                                                                                                                                                                                                                                                                                                                                                                                                                                                                                                                                                                                                                                                                                                                                                                                                                                                                                                                                                                                                                                                                                                                                                                                                                                                            |                        |                          |                                                      |                     |                   |                       |                        |                     |                  |                     |                     |                     |               |                     |                       |                      |                      |                        |                        |                        |         |                        |                        |                        |         |                        |                        |                        |          |                        |                        |                        |                              |                        |                        |                        |                              |                        |                        |                        |          |                     |                       |                     |  |                   |                       |                                       |               |      |                    |            |     |  |                  |                     |                                       |            |      |                    |            |     |  |               |                  |                                       |              |      |                    |            |     |  |                       |                         |                                       |               |      |                    |             |     |
|                                                           | Headaches, eye strain                                                                                  | No headaches, eyestrain                                                                                                                                                     |                                                                                                                                                                                                                   |                                                                                                                                                                                                                                                                                                                                                                                                                                                                                                                                                                                                                                                                                                                                                                                                                                                                                                                                                                                                                                                                                                                                                                                                                                                                                                                                                                                                                                                                                                                                                                                                                                                                                                                                                                                                                                                                                                                                                                                                                                                                                                                                                                                                                                                                                                                                                                                                                                                                                                                                                                                                                                                                                                                                                                                                                                                                                                                                                                                                                                                                                                                                                                                                                                                                                                                                                                                                                                                                                                                                                                                                                            |                        |                          |                                                      |                     |                   |                       |                        |                     |                  |                     |                     |                     |               |                     |                       |                      |                      |                        |                        |                        |         |                        |                        |                        |         |                        |                        |                        |          |                        |                        |                        |                              |                        |                        |                        |                              |                        |                        |                        |          |                     |                       |                     |  |                   |                       |                                       |               |      |                    |            |     |  |                  |                     |                                       |            |      |                    |            |     |  |               |                  |                                       |              |      |                    |            |     |  |                       |                         |                                       |               |      |                    |             |     |
| Highly precarious employment (n=4769)                     | (44.89%) 2150                                                                                          | 2619                                                                                                                                                                        |                                                                                                                                                                                                                   |                                                                                                                                                                                                                                                                                                                                                                                                                                                                                                                                                                                                                                                                                                                                                                                                                                                                                                                                                                                                                                                                                                                                                                                                                                                                                                                                                                                                                                                                                                                                                                                                                                                                                                                                                                                                                                                                                                                                                                                                                                                                                                                                                                                                                                                                                                                                                                                                                                                                                                                                                                                                                                                                                                                                                                                                                                                                                                                                                                                                                                                                                                                                                                                                                                                                                                                                                                                                                                                                                                                                                                                                                            |                        |                          |                                                      |                     |                   |                       |                        |                     |                  |                     |                     |                     |               |                     |                       |                      |                      |                        |                        |                        |         |                        |                        |                        |         |                        |                        |                        |          |                        |                        |                        |                              |                        |                        |                        |                              |                        |                        |                        |          |                     |                       |                     |  |                   |                       |                                       |               |      |                    |            |     |  |                  |                     |                                       |            |      |                    |            |     |  |               |                  |                                       |              |      |                    |            |     |  |                       |                         |                                       |               |      |                    |             |     |
| Unemployed (n=253)                                        | (36.23%) 92                                                                                            | 161                                                                                                                                                                         |                                                                                                                                                                                                                   |                                                                                                                                                                                                                                                                                                                                                                                                                                                                                                                                                                                                                                                                                                                                                                                                                                                                                                                                                                                                                                                                                                                                                                                                                                                                                                                                                                                                                                                                                                                                                                                                                                                                                                                                                                                                                                                                                                                                                                                                                                                                                                                                                                                                                                                                                                                                                                                                                                                                                                                                                                                                                                                                                                                                                                                                                                                                                                                                                                                                                                                                                                                                                                                                                                                                                                                                                                                                                                                                                                                                                                                                                            |                        |                          |                                                      |                     |                   |                       |                        |                     |                  |                     |                     |                     |               |                     |                       |                      |                      |                        |                        |                        |         |                        |                        |                        |         |                        |                        |                        |          |                        |                        |                        |                              |                        |                        |                        |                              |                        |                        |                        |          |                     |                       |                     |  |                   |                       |                                       |               |      |                    |            |     |  |                  |                     |                                       |            |      |                    |            |     |  |               |                  |                                       |              |      |                    |            |     |  |                       |                         |                                       |               |      |                    |             |     |

| Reference/<br>Study design            | Data source/<br>Population<br>range | Poor/bad job<br>definition<br>Outcome | Results from paper | <b>Is any job better than no job?</b><br>Where OR has been calculated by OES exposure is bad/poor job, is unadjusted and data used to calculate may have been derived from percentages in study results tables                                                                                                                                                                                                                                                                                                                                                                                                                                                                                                                                                                                                                                                                                                                                                                                                                                                                                                                                                                                                                                                                                                                                                                                                                                                                                                                                                                                                                                                                                                                                                                                                                                                                                                                                                                                                                                                                                                                                                                                                 |  |         |            |                                       |               |      |                    |             |     |  |         |            |                                       |               |      |                    |             |     |  |          |             |                                       |               |      |                    |              |     |  |                           |                              |                                       |               |      |                    |              |     |  |                           |                              |                                       |               |      |                    |             |     |  |          |             |                                       |              |      |                    |            |     |
|---------------------------------------|-------------------------------------|---------------------------------------|--------------------|----------------------------------------------------------------------------------------------------------------------------------------------------------------------------------------------------------------------------------------------------------------------------------------------------------------------------------------------------------------------------------------------------------------------------------------------------------------------------------------------------------------------------------------------------------------------------------------------------------------------------------------------------------------------------------------------------------------------------------------------------------------------------------------------------------------------------------------------------------------------------------------------------------------------------------------------------------------------------------------------------------------------------------------------------------------------------------------------------------------------------------------------------------------------------------------------------------------------------------------------------------------------------------------------------------------------------------------------------------------------------------------------------------------------------------------------------------------------------------------------------------------------------------------------------------------------------------------------------------------------------------------------------------------------------------------------------------------------------------------------------------------------------------------------------------------------------------------------------------------------------------------------------------------------------------------------------------------------------------------------------------------------------------------------------------------------------------------------------------------------------------------------------------------------------------------------------------------|--|---------|------------|---------------------------------------|---------------|------|--------------------|-------------|-----|--|---------|------------|---------------------------------------|---------------|------|--------------------|-------------|-----|--|----------|-------------|---------------------------------------|---------------|------|--------------------|--------------|-----|--|---------------------------|------------------------------|---------------------------------------|---------------|------|--------------------|--------------|-----|--|---------------------------|------------------------------|---------------------------------------|---------------|------|--------------------|-------------|-----|--|----------|-------------|---------------------------------------|--------------|------|--------------------|------------|-----|
|                                       |                                     |                                       |                    | <table border="1"> <thead> <tr> <th></th> <th>Anxiety</th> <th>No anxiety</th> </tr> </thead> <tbody> <tr> <td>Highly precarious employment (n=4769)</td> <td>(22.19%) 1058</td> <td>3711</td> </tr> <tr> <td>Unemployed (n=253)</td> <td>(21.14%) 53</td> <td>200</td> </tr> </tbody> </table> <p>Odds ratio 1.08, 95% CI 0.78 to 1.47 p=0.6444</p> <table border="1"> <thead> <tr> <th></th> <th>Fatigue</th> <th>No fatigue</th> </tr> </thead> <tbody> <tr> <td>Highly precarious employment (n=4769)</td> <td>(48.27%) 2302</td> <td>2467</td> </tr> <tr> <td>Unemployed (n=253)</td> <td>(38.95%) 99</td> <td>154</td> </tr> </tbody> </table> <p>Odds ratio 1.45, 95% CI 1.12 to 1.88, p=0.0048</p> <table border="1"> <thead> <tr> <th></th> <th>Backache</th> <th>No backache</th> </tr> </thead> <tbody> <tr> <td>Highly precarious employment (n=4769)</td> <td>(52.56%) 2507</td> <td>2262</td> </tr> <tr> <td>Unemployed (n=253)</td> <td>(47.20%) 119</td> <td>134</td> </tr> </tbody> </table> <p>Odds ratio 1.25, 95% CI 0.97 to 1.60, p=0.0865</p> <table border="1"> <thead> <tr> <th></th> <th>Muscular pain upper limbs</th> <th>No muscular pain upper limbs</th> </tr> </thead> <tbody> <tr> <td>Highly precarious employment (n=4769)</td> <td>(50.75%) 2420</td> <td>2349</td> </tr> <tr> <td>Unemployed (n=253)</td> <td>(40.28%) 102</td> <td>151</td> </tr> </tbody> </table> <p>Odds ratio 1.53, 95% CI 1.18 to 1.97, p=0.0013</p> <table border="1"> <thead> <tr> <th></th> <th>Muscular pain lower limbs</th> <th>No muscular pain lower limbs</th> </tr> </thead> <tbody> <tr> <td>Highly precarious employment (n=4769)</td> <td>(37.46%) 1786</td> <td>2983</td> </tr> <tr> <td>Unemployed (n=253)</td> <td>(35.54%) 90</td> <td>163</td> </tr> </tbody> </table> <p>Odds ratio 1.08, 95% CI 0.83 to 1.41, p=0.5476</p> <table border="1"> <thead> <tr> <th></th> <th>Injuries</th> <th>No injuries</th> </tr> </thead> <tbody> <tr> <td>Highly precarious employment (n=4769)</td> <td>(10.83%) 516</td> <td>4253</td> </tr> <tr> <td>Unemployed (n=253)</td> <td>(6.18%) 16</td> <td>237</td> </tr> </tbody> </table> <p>Odds ratio 1.80, 95% CI 1.07 to 3.00, p=0.0255</p> |  | Anxiety | No anxiety | Highly precarious employment (n=4769) | (22.19%) 1058 | 3711 | Unemployed (n=253) | (21.14%) 53 | 200 |  | Fatigue | No fatigue | Highly precarious employment (n=4769) | (48.27%) 2302 | 2467 | Unemployed (n=253) | (38.95%) 99 | 154 |  | Backache | No backache | Highly precarious employment (n=4769) | (52.56%) 2507 | 2262 | Unemployed (n=253) | (47.20%) 119 | 134 |  | Muscular pain upper limbs | No muscular pain upper limbs | Highly precarious employment (n=4769) | (50.75%) 2420 | 2349 | Unemployed (n=253) | (40.28%) 102 | 151 |  | Muscular pain lower limbs | No muscular pain lower limbs | Highly precarious employment (n=4769) | (37.46%) 1786 | 2983 | Unemployed (n=253) | (35.54%) 90 | 163 |  | Injuries | No injuries | Highly precarious employment (n=4769) | (10.83%) 516 | 4253 | Unemployed (n=253) | (6.18%) 16 | 237 |
|                                       | Anxiety                             | No anxiety                            |                    |                                                                                                                                                                                                                                                                                                                                                                                                                                                                                                                                                                                                                                                                                                                                                                                                                                                                                                                                                                                                                                                                                                                                                                                                                                                                                                                                                                                                                                                                                                                                                                                                                                                                                                                                                                                                                                                                                                                                                                                                                                                                                                                                                                                                                |  |         |            |                                       |               |      |                    |             |     |  |         |            |                                       |               |      |                    |             |     |  |          |             |                                       |               |      |                    |              |     |  |                           |                              |                                       |               |      |                    |              |     |  |                           |                              |                                       |               |      |                    |             |     |  |          |             |                                       |              |      |                    |            |     |
| Highly precarious employment (n=4769) | (22.19%) 1058                       | 3711                                  |                    |                                                                                                                                                                                                                                                                                                                                                                                                                                                                                                                                                                                                                                                                                                                                                                                                                                                                                                                                                                                                                                                                                                                                                                                                                                                                                                                                                                                                                                                                                                                                                                                                                                                                                                                                                                                                                                                                                                                                                                                                                                                                                                                                                                                                                |  |         |            |                                       |               |      |                    |             |     |  |         |            |                                       |               |      |                    |             |     |  |          |             |                                       |               |      |                    |              |     |  |                           |                              |                                       |               |      |                    |              |     |  |                           |                              |                                       |               |      |                    |             |     |  |          |             |                                       |              |      |                    |            |     |
| Unemployed (n=253)                    | (21.14%) 53                         | 200                                   |                    |                                                                                                                                                                                                                                                                                                                                                                                                                                                                                                                                                                                                                                                                                                                                                                                                                                                                                                                                                                                                                                                                                                                                                                                                                                                                                                                                                                                                                                                                                                                                                                                                                                                                                                                                                                                                                                                                                                                                                                                                                                                                                                                                                                                                                |  |         |            |                                       |               |      |                    |             |     |  |         |            |                                       |               |      |                    |             |     |  |          |             |                                       |               |      |                    |              |     |  |                           |                              |                                       |               |      |                    |              |     |  |                           |                              |                                       |               |      |                    |             |     |  |          |             |                                       |              |      |                    |            |     |
|                                       | Fatigue                             | No fatigue                            |                    |                                                                                                                                                                                                                                                                                                                                                                                                                                                                                                                                                                                                                                                                                                                                                                                                                                                                                                                                                                                                                                                                                                                                                                                                                                                                                                                                                                                                                                                                                                                                                                                                                                                                                                                                                                                                                                                                                                                                                                                                                                                                                                                                                                                                                |  |         |            |                                       |               |      |                    |             |     |  |         |            |                                       |               |      |                    |             |     |  |          |             |                                       |               |      |                    |              |     |  |                           |                              |                                       |               |      |                    |              |     |  |                           |                              |                                       |               |      |                    |             |     |  |          |             |                                       |              |      |                    |            |     |
| Highly precarious employment (n=4769) | (48.27%) 2302                       | 2467                                  |                    |                                                                                                                                                                                                                                                                                                                                                                                                                                                                                                                                                                                                                                                                                                                                                                                                                                                                                                                                                                                                                                                                                                                                                                                                                                                                                                                                                                                                                                                                                                                                                                                                                                                                                                                                                                                                                                                                                                                                                                                                                                                                                                                                                                                                                |  |         |            |                                       |               |      |                    |             |     |  |         |            |                                       |               |      |                    |             |     |  |          |             |                                       |               |      |                    |              |     |  |                           |                              |                                       |               |      |                    |              |     |  |                           |                              |                                       |               |      |                    |             |     |  |          |             |                                       |              |      |                    |            |     |
| Unemployed (n=253)                    | (38.95%) 99                         | 154                                   |                    |                                                                                                                                                                                                                                                                                                                                                                                                                                                                                                                                                                                                                                                                                                                                                                                                                                                                                                                                                                                                                                                                                                                                                                                                                                                                                                                                                                                                                                                                                                                                                                                                                                                                                                                                                                                                                                                                                                                                                                                                                                                                                                                                                                                                                |  |         |            |                                       |               |      |                    |             |     |  |         |            |                                       |               |      |                    |             |     |  |          |             |                                       |               |      |                    |              |     |  |                           |                              |                                       |               |      |                    |              |     |  |                           |                              |                                       |               |      |                    |             |     |  |          |             |                                       |              |      |                    |            |     |
|                                       | Backache                            | No backache                           |                    |                                                                                                                                                                                                                                                                                                                                                                                                                                                                                                                                                                                                                                                                                                                                                                                                                                                                                                                                                                                                                                                                                                                                                                                                                                                                                                                                                                                                                                                                                                                                                                                                                                                                                                                                                                                                                                                                                                                                                                                                                                                                                                                                                                                                                |  |         |            |                                       |               |      |                    |             |     |  |         |            |                                       |               |      |                    |             |     |  |          |             |                                       |               |      |                    |              |     |  |                           |                              |                                       |               |      |                    |              |     |  |                           |                              |                                       |               |      |                    |             |     |  |          |             |                                       |              |      |                    |            |     |
| Highly precarious employment (n=4769) | (52.56%) 2507                       | 2262                                  |                    |                                                                                                                                                                                                                                                                                                                                                                                                                                                                                                                                                                                                                                                                                                                                                                                                                                                                                                                                                                                                                                                                                                                                                                                                                                                                                                                                                                                                                                                                                                                                                                                                                                                                                                                                                                                                                                                                                                                                                                                                                                                                                                                                                                                                                |  |         |            |                                       |               |      |                    |             |     |  |         |            |                                       |               |      |                    |             |     |  |          |             |                                       |               |      |                    |              |     |  |                           |                              |                                       |               |      |                    |              |     |  |                           |                              |                                       |               |      |                    |             |     |  |          |             |                                       |              |      |                    |            |     |
| Unemployed (n=253)                    | (47.20%) 119                        | 134                                   |                    |                                                                                                                                                                                                                                                                                                                                                                                                                                                                                                                                                                                                                                                                                                                                                                                                                                                                                                                                                                                                                                                                                                                                                                                                                                                                                                                                                                                                                                                                                                                                                                                                                                                                                                                                                                                                                                                                                                                                                                                                                                                                                                                                                                                                                |  |         |            |                                       |               |      |                    |             |     |  |         |            |                                       |               |      |                    |             |     |  |          |             |                                       |               |      |                    |              |     |  |                           |                              |                                       |               |      |                    |              |     |  |                           |                              |                                       |               |      |                    |             |     |  |          |             |                                       |              |      |                    |            |     |
|                                       | Muscular pain upper limbs           | No muscular pain upper limbs          |                    |                                                                                                                                                                                                                                                                                                                                                                                                                                                                                                                                                                                                                                                                                                                                                                                                                                                                                                                                                                                                                                                                                                                                                                                                                                                                                                                                                                                                                                                                                                                                                                                                                                                                                                                                                                                                                                                                                                                                                                                                                                                                                                                                                                                                                |  |         |            |                                       |               |      |                    |             |     |  |         |            |                                       |               |      |                    |             |     |  |          |             |                                       |               |      |                    |              |     |  |                           |                              |                                       |               |      |                    |              |     |  |                           |                              |                                       |               |      |                    |             |     |  |          |             |                                       |              |      |                    |            |     |
| Highly precarious employment (n=4769) | (50.75%) 2420                       | 2349                                  |                    |                                                                                                                                                                                                                                                                                                                                                                                                                                                                                                                                                                                                                                                                                                                                                                                                                                                                                                                                                                                                                                                                                                                                                                                                                                                                                                                                                                                                                                                                                                                                                                                                                                                                                                                                                                                                                                                                                                                                                                                                                                                                                                                                                                                                                |  |         |            |                                       |               |      |                    |             |     |  |         |            |                                       |               |      |                    |             |     |  |          |             |                                       |               |      |                    |              |     |  |                           |                              |                                       |               |      |                    |              |     |  |                           |                              |                                       |               |      |                    |             |     |  |          |             |                                       |              |      |                    |            |     |
| Unemployed (n=253)                    | (40.28%) 102                        | 151                                   |                    |                                                                                                                                                                                                                                                                                                                                                                                                                                                                                                                                                                                                                                                                                                                                                                                                                                                                                                                                                                                                                                                                                                                                                                                                                                                                                                                                                                                                                                                                                                                                                                                                                                                                                                                                                                                                                                                                                                                                                                                                                                                                                                                                                                                                                |  |         |            |                                       |               |      |                    |             |     |  |         |            |                                       |               |      |                    |             |     |  |          |             |                                       |               |      |                    |              |     |  |                           |                              |                                       |               |      |                    |              |     |  |                           |                              |                                       |               |      |                    |             |     |  |          |             |                                       |              |      |                    |            |     |
|                                       | Muscular pain lower limbs           | No muscular pain lower limbs          |                    |                                                                                                                                                                                                                                                                                                                                                                                                                                                                                                                                                                                                                                                                                                                                                                                                                                                                                                                                                                                                                                                                                                                                                                                                                                                                                                                                                                                                                                                                                                                                                                                                                                                                                                                                                                                                                                                                                                                                                                                                                                                                                                                                                                                                                |  |         |            |                                       |               |      |                    |             |     |  |         |            |                                       |               |      |                    |             |     |  |          |             |                                       |               |      |                    |              |     |  |                           |                              |                                       |               |      |                    |              |     |  |                           |                              |                                       |               |      |                    |             |     |  |          |             |                                       |              |      |                    |            |     |
| Highly precarious employment (n=4769) | (37.46%) 1786                       | 2983                                  |                    |                                                                                                                                                                                                                                                                                                                                                                                                                                                                                                                                                                                                                                                                                                                                                                                                                                                                                                                                                                                                                                                                                                                                                                                                                                                                                                                                                                                                                                                                                                                                                                                                                                                                                                                                                                                                                                                                                                                                                                                                                                                                                                                                                                                                                |  |         |            |                                       |               |      |                    |             |     |  |         |            |                                       |               |      |                    |             |     |  |          |             |                                       |               |      |                    |              |     |  |                           |                              |                                       |               |      |                    |              |     |  |                           |                              |                                       |               |      |                    |             |     |  |          |             |                                       |              |      |                    |            |     |
| Unemployed (n=253)                    | (35.54%) 90                         | 163                                   |                    |                                                                                                                                                                                                                                                                                                                                                                                                                                                                                                                                                                                                                                                                                                                                                                                                                                                                                                                                                                                                                                                                                                                                                                                                                                                                                                                                                                                                                                                                                                                                                                                                                                                                                                                                                                                                                                                                                                                                                                                                                                                                                                                                                                                                                |  |         |            |                                       |               |      |                    |             |     |  |         |            |                                       |               |      |                    |             |     |  |          |             |                                       |               |      |                    |              |     |  |                           |                              |                                       |               |      |                    |              |     |  |                           |                              |                                       |               |      |                    |             |     |  |          |             |                                       |              |      |                    |            |     |
|                                       | Injuries                            | No injuries                           |                    |                                                                                                                                                                                                                                                                                                                                                                                                                                                                                                                                                                                                                                                                                                                                                                                                                                                                                                                                                                                                                                                                                                                                                                                                                                                                                                                                                                                                                                                                                                                                                                                                                                                                                                                                                                                                                                                                                                                                                                                                                                                                                                                                                                                                                |  |         |            |                                       |               |      |                    |             |     |  |         |            |                                       |               |      |                    |             |     |  |          |             |                                       |               |      |                    |              |     |  |                           |                              |                                       |               |      |                    |              |     |  |                           |                              |                                       |               |      |                    |             |     |  |          |             |                                       |              |      |                    |            |     |
| Highly precarious employment (n=4769) | (10.83%) 516                        | 4253                                  |                    |                                                                                                                                                                                                                                                                                                                                                                                                                                                                                                                                                                                                                                                                                                                                                                                                                                                                                                                                                                                                                                                                                                                                                                                                                                                                                                                                                                                                                                                                                                                                                                                                                                                                                                                                                                                                                                                                                                                                                                                                                                                                                                                                                                                                                |  |         |            |                                       |               |      |                    |             |     |  |         |            |                                       |               |      |                    |             |     |  |          |             |                                       |               |      |                    |              |     |  |                           |                              |                                       |               |      |                    |              |     |  |                           |                              |                                       |               |      |                    |             |     |  |          |             |                                       |              |      |                    |            |     |
| Unemployed (n=253)                    | (6.18%) 16                          | 237                                   |                    |                                                                                                                                                                                                                                                                                                                                                                                                                                                                                                                                                                                                                                                                                                                                                                                                                                                                                                                                                                                                                                                                                                                                                                                                                                                                                                                                                                                                                                                                                                                                                                                                                                                                                                                                                                                                                                                                                                                                                                                                                                                                                                                                                                                                                |  |         |            |                                       |               |      |                    |             |     |  |         |            |                                       |               |      |                    |             |     |  |          |             |                                       |               |      |                    |              |     |  |                           |                              |                                       |               |      |                    |              |     |  |                           |                              |                                       |               |      |                    |             |     |  |          |             |                                       |              |      |                    |            |     |

| Reference/<br>Study design               | Data source/<br>Population<br>range                                         | Poor/bad job<br>definition<br>Outcome                                                               | Results from paper                                                                                                                                                                                                                                                                                                                                                                                                                                                                                                                                                                                                                                                                                                                                                                                                                                                                                                                                                                                                                                                                                                                                                                                                                                                                                                                                                                                                                                                                                                                                                                                                                                                                                                                                                                                                                                                                                                                                                                                                                                                                                                                                                                                                                                                                                                                                                                                                                                                                                                                                                                                                                                                                                                                                                                                                                                                                                                                                                                                                                                                                                               | Is any job better than no job?<br>Where OR has been calculated by OES exposure is bad/poor job, is unadjusted and data used to calculate may have been derived from percentages in study results tables                                                                                                                                                                                                                              |                                |                                                                                                                                                           |                                  |                 |                    |                     |                     |                        |                     |                     |                       |                           |                     |                       |                     |                                       |                       |                       |                       |                       |                     |                     |                     |                             |                     |                     |                     |                |                     |                     |                       |                       |                     |                     |                     |                                     |                     |                     |                     |                                                                                                                                                                                                                                                                                                                                                                                                                                                                                                                                                                                                                                                                                                             |                              |                       |                      |                                      |                     |                      |                            |                                                                                                                                                                                                                                                                                                                                                                                                                                                                                                                                                                                                                                                                                                                                                                                                     |      |
|------------------------------------------|-----------------------------------------------------------------------------|-----------------------------------------------------------------------------------------------------|------------------------------------------------------------------------------------------------------------------------------------------------------------------------------------------------------------------------------------------------------------------------------------------------------------------------------------------------------------------------------------------------------------------------------------------------------------------------------------------------------------------------------------------------------------------------------------------------------------------------------------------------------------------------------------------------------------------------------------------------------------------------------------------------------------------------------------------------------------------------------------------------------------------------------------------------------------------------------------------------------------------------------------------------------------------------------------------------------------------------------------------------------------------------------------------------------------------------------------------------------------------------------------------------------------------------------------------------------------------------------------------------------------------------------------------------------------------------------------------------------------------------------------------------------------------------------------------------------------------------------------------------------------------------------------------------------------------------------------------------------------------------------------------------------------------------------------------------------------------------------------------------------------------------------------------------------------------------------------------------------------------------------------------------------------------------------------------------------------------------------------------------------------------------------------------------------------------------------------------------------------------------------------------------------------------------------------------------------------------------------------------------------------------------------------------------------------------------------------------------------------------------------------------------------------------------------------------------------------------------------------------------------------------------------------------------------------------------------------------------------------------------------------------------------------------------------------------------------------------------------------------------------------------------------------------------------------------------------------------------------------------------------------------------------------------------------------------------------------------|--------------------------------------------------------------------------------------------------------------------------------------------------------------------------------------------------------------------------------------------------------------------------------------------------------------------------------------------------------------------------------------------------------------------------------------|--------------------------------|-----------------------------------------------------------------------------------------------------------------------------------------------------------|----------------------------------|-----------------|--------------------|---------------------|---------------------|------------------------|---------------------|---------------------|-----------------------|---------------------------|---------------------|-----------------------|---------------------|---------------------------------------|-----------------------|-----------------------|-----------------------|-----------------------|---------------------|---------------------|---------------------|-----------------------------|---------------------|---------------------|---------------------|----------------|---------------------|---------------------|-----------------------|-----------------------|---------------------|---------------------|---------------------|-------------------------------------|---------------------|---------------------|---------------------|-------------------------------------------------------------------------------------------------------------------------------------------------------------------------------------------------------------------------------------------------------------------------------------------------------------------------------------------------------------------------------------------------------------------------------------------------------------------------------------------------------------------------------------------------------------------------------------------------------------------------------------------------------------------------------------------------------------|------------------------------|-----------------------|----------------------|--------------------------------------|---------------------|----------------------|----------------------------|-----------------------------------------------------------------------------------------------------------------------------------------------------------------------------------------------------------------------------------------------------------------------------------------------------------------------------------------------------------------------------------------------------------------------------------------------------------------------------------------------------------------------------------------------------------------------------------------------------------------------------------------------------------------------------------------------------------------------------------------------------------------------------------------------------|------|
| Minelli L et al. 2014<br>Cross sectional | Survey on Household Income, Italy, 2006 to 2010<br>15 to 64 years           | Insecure employment (included apprenticeships, on-project jobs and seasonal jobs)<br>General health | Fixed effects (FE) and random effects (RE) ordered Logit models for self-reported health status M2 includes the interaction of employment condition and time. Coefficients and standard errors. Those significant at 10% level are in bold<br><br><table border="0" style="width: 100%; border-collapse: collapse;"> <tr> <td></td> <td colspan="2" style="text-align: center;">M1</td> <td colspan="2" style="text-align: center;">M2</td> </tr> <tr> <td>Ref: Permanent</td> <td style="text-align: center;">FE</td> <td style="text-align: center;">RE</td> <td style="text-align: center;">FE</td> <td style="text-align: center;">RE</td> </tr> <tr> <td>Temporary</td> <td style="text-align: center;"><b>-0.147</b> (0.100)</td> <td style="text-align: center;"><b>-4.000</b> (0.058)</td> <td style="text-align: center;">-0.159 (0.159)</td> <td style="text-align: center;"><b>-0.455</b> (0.095)</td> </tr> <tr> <td>Unemployed</td> <td style="text-align: center;"><b>-0.317</b> (0.150)</td> <td style="text-align: center;"><b>-0.710</b> (0.086)</td> <td style="text-align: center;"><b>-0.366</b> (0.237)</td> <td style="text-align: center;"><b>-0.820</b> (0.143)</td> </tr> </table><br>Fixed-effects ordered logit models for self-reported health status by gender. Coefficients and standard errors. Those significant at 10% level are in bold. (table 4)<br><br><table border="0" style="width: 100%; border-collapse: collapse;"> <tr> <td></td> <td colspan="2" style="text-align: center;">Male</td> <td colspan="2" style="text-align: center;">Female</td> </tr> <tr> <td>Ref: Permanent</td> <td style="text-align: center;">M1 (s.e)</td> <td style="text-align: center;">M2 (s.e.)</td> <td style="text-align: center;">M1 (s.e)</td> <td style="text-align: center;">M2 (s.e)</td> </tr> <tr> <td>Temporary</td> <td style="text-align: center;"><b>-0.288</b> (0.145)</td> <td style="text-align: center;"><b>-0.331</b> (0.234)</td> <td style="text-align: center;">0.080 (0.163)</td> <td style="text-align: center;">0.159 (0.247)</td> </tr> <tr> <td>Unemployed</td> <td style="text-align: center;"><b>-0.423</b> (0.212)</td> <td style="text-align: center;">-0.371 (0.326)</td> <td style="text-align: center;">-0.160 (0.245)</td> <td style="text-align: center;">-0.456 (0.385)</td> </tr> </table>                                                                                                                                                                                                                                                                                                                                                                                                                                                                                                                                                                                                                                                                                                                                                           |                                                                                                                                                                                                                                                                                                                                                                                                                                      | M1                             |                                                                                                                                                           | M2                               |                 | Ref: Permanent     | FE                  | RE                  | FE                     | RE                  | Temporary           | <b>-0.147</b> (0.100) | <b>-4.000</b> (0.058)     | -0.159 (0.159)      | <b>-0.455</b> (0.095) | Unemployed          | <b>-0.317</b> (0.150)                 | <b>-0.710</b> (0.086) | <b>-0.366</b> (0.237) | <b>-0.820</b> (0.143) |                       | Male                |                     | Female              |                             | Ref: Permanent      | M1 (s.e)            | M2 (s.e.)           | M1 (s.e)       | M2 (s.e)            | Temporary           | <b>-0.288</b> (0.145) | <b>-0.331</b> (0.234) | 0.080 (0.163)       | 0.159 (0.247)       | Unemployed          | <b>-0.423</b> (0.212)               | -0.371 (0.326)      | -0.160 (0.245)      | -0.456 (0.385)      | Yes: Being unemployed had a significantly greater negative effect on perceived health when compared with being in temporary employment.<br><br>Data from table 1, page 4. Does not give number of participants so have used number of observations as stated in text<br><table border="1" style="width: 100%; border-collapse: collapse;"> <tr> <td>N =37,782 total observations</td> <td>Poor/very poor health</td> <td>Not very poor health</td> </tr> <tr> <td>Temporary employment (7.72%) n= 2917</td> <td>(0.07% + 1.20%) 37</td> <td>2880</td> </tr> <tr> <td>Unemployed (3.95%) n= 1492</td> <td>(0.47% + 3.96) 66</td> <td>1426</td> </tr> </table> Odds ratio 0.27, 95% CI 0. 18 to 0.42 p<0.0001 | N =37,782 total observations | Poor/very poor health | Not very poor health | Temporary employment (7.72%) n= 2917 | (0.07% + 1.20%) 37  | 2880                 | Unemployed (3.95%) n= 1492 | (0.47% + 3.96) 66                                                                                                                                                                                                                                                                                                                                                                                                                                                                                                                                                                                                                                                                                                                                                                                   | 1426 |
|                                          | M1                                                                          |                                                                                                     | M2                                                                                                                                                                                                                                                                                                                                                                                                                                                                                                                                                                                                                                                                                                                                                                                                                                                                                                                                                                                                                                                                                                                                                                                                                                                                                                                                                                                                                                                                                                                                                                                                                                                                                                                                                                                                                                                                                                                                                                                                                                                                                                                                                                                                                                                                                                                                                                                                                                                                                                                                                                                                                                                                                                                                                                                                                                                                                                                                                                                                                                                                                                               |                                                                                                                                                                                                                                                                                                                                                                                                                                      |                                |                                                                                                                                                           |                                  |                 |                    |                     |                     |                        |                     |                     |                       |                           |                     |                       |                     |                                       |                       |                       |                       |                       |                     |                     |                     |                             |                     |                     |                     |                |                     |                     |                       |                       |                     |                     |                     |                                     |                     |                     |                     |                                                                                                                                                                                                                                                                                                                                                                                                                                                                                                                                                                                                                                                                                                             |                              |                       |                      |                                      |                     |                      |                            |                                                                                                                                                                                                                                                                                                                                                                                                                                                                                                                                                                                                                                                                                                                                                                                                     |      |
| Ref: Permanent                           | FE                                                                          | RE                                                                                                  | FE                                                                                                                                                                                                                                                                                                                                                                                                                                                                                                                                                                                                                                                                                                                                                                                                                                                                                                                                                                                                                                                                                                                                                                                                                                                                                                                                                                                                                                                                                                                                                                                                                                                                                                                                                                                                                                                                                                                                                                                                                                                                                                                                                                                                                                                                                                                                                                                                                                                                                                                                                                                                                                                                                                                                                                                                                                                                                                                                                                                                                                                                                                               | RE                                                                                                                                                                                                                                                                                                                                                                                                                                   |                                |                                                                                                                                                           |                                  |                 |                    |                     |                     |                        |                     |                     |                       |                           |                     |                       |                     |                                       |                       |                       |                       |                       |                     |                     |                     |                             |                     |                     |                     |                |                     |                     |                       |                       |                     |                     |                     |                                     |                     |                     |                     |                                                                                                                                                                                                                                                                                                                                                                                                                                                                                                                                                                                                                                                                                                             |                              |                       |                      |                                      |                     |                      |                            |                                                                                                                                                                                                                                                                                                                                                                                                                                                                                                                                                                                                                                                                                                                                                                                                     |      |
| Temporary                                | <b>-0.147</b> (0.100)                                                       | <b>-4.000</b> (0.058)                                                                               | -0.159 (0.159)                                                                                                                                                                                                                                                                                                                                                                                                                                                                                                                                                                                                                                                                                                                                                                                                                                                                                                                                                                                                                                                                                                                                                                                                                                                                                                                                                                                                                                                                                                                                                                                                                                                                                                                                                                                                                                                                                                                                                                                                                                                                                                                                                                                                                                                                                                                                                                                                                                                                                                                                                                                                                                                                                                                                                                                                                                                                                                                                                                                                                                                                                                   | <b>-0.455</b> (0.095)                                                                                                                                                                                                                                                                                                                                                                                                                |                                |                                                                                                                                                           |                                  |                 |                    |                     |                     |                        |                     |                     |                       |                           |                     |                       |                     |                                       |                       |                       |                       |                       |                     |                     |                     |                             |                     |                     |                     |                |                     |                     |                       |                       |                     |                     |                     |                                     |                     |                     |                     |                                                                                                                                                                                                                                                                                                                                                                                                                                                                                                                                                                                                                                                                                                             |                              |                       |                      |                                      |                     |                      |                            |                                                                                                                                                                                                                                                                                                                                                                                                                                                                                                                                                                                                                                                                                                                                                                                                     |      |
| Unemployed                               | <b>-0.317</b> (0.150)                                                       | <b>-0.710</b> (0.086)                                                                               | <b>-0.366</b> (0.237)                                                                                                                                                                                                                                                                                                                                                                                                                                                                                                                                                                                                                                                                                                                                                                                                                                                                                                                                                                                                                                                                                                                                                                                                                                                                                                                                                                                                                                                                                                                                                                                                                                                                                                                                                                                                                                                                                                                                                                                                                                                                                                                                                                                                                                                                                                                                                                                                                                                                                                                                                                                                                                                                                                                                                                                                                                                                                                                                                                                                                                                                                            | <b>-0.820</b> (0.143)                                                                                                                                                                                                                                                                                                                                                                                                                |                                |                                                                                                                                                           |                                  |                 |                    |                     |                     |                        |                     |                     |                       |                           |                     |                       |                     |                                       |                       |                       |                       |                       |                     |                     |                     |                             |                     |                     |                     |                |                     |                     |                       |                       |                     |                     |                     |                                     |                     |                     |                     |                                                                                                                                                                                                                                                                                                                                                                                                                                                                                                                                                                                                                                                                                                             |                              |                       |                      |                                      |                     |                      |                            |                                                                                                                                                                                                                                                                                                                                                                                                                                                                                                                                                                                                                                                                                                                                                                                                     |      |
|                                          | Male                                                                        |                                                                                                     | Female                                                                                                                                                                                                                                                                                                                                                                                                                                                                                                                                                                                                                                                                                                                                                                                                                                                                                                                                                                                                                                                                                                                                                                                                                                                                                                                                                                                                                                                                                                                                                                                                                                                                                                                                                                                                                                                                                                                                                                                                                                                                                                                                                                                                                                                                                                                                                                                                                                                                                                                                                                                                                                                                                                                                                                                                                                                                                                                                                                                                                                                                                                           |                                                                                                                                                                                                                                                                                                                                                                                                                                      |                                |                                                                                                                                                           |                                  |                 |                    |                     |                     |                        |                     |                     |                       |                           |                     |                       |                     |                                       |                       |                       |                       |                       |                     |                     |                     |                             |                     |                     |                     |                |                     |                     |                       |                       |                     |                     |                     |                                     |                     |                     |                     |                                                                                                                                                                                                                                                                                                                                                                                                                                                                                                                                                                                                                                                                                                             |                              |                       |                      |                                      |                     |                      |                            |                                                                                                                                                                                                                                                                                                                                                                                                                                                                                                                                                                                                                                                                                                                                                                                                     |      |
| Ref: Permanent                           | M1 (s.e)                                                                    | M2 (s.e.)                                                                                           | M1 (s.e)                                                                                                                                                                                                                                                                                                                                                                                                                                                                                                                                                                                                                                                                                                                                                                                                                                                                                                                                                                                                                                                                                                                                                                                                                                                                                                                                                                                                                                                                                                                                                                                                                                                                                                                                                                                                                                                                                                                                                                                                                                                                                                                                                                                                                                                                                                                                                                                                                                                                                                                                                                                                                                                                                                                                                                                                                                                                                                                                                                                                                                                                                                         | M2 (s.e)                                                                                                                                                                                                                                                                                                                                                                                                                             |                                |                                                                                                                                                           |                                  |                 |                    |                     |                     |                        |                     |                     |                       |                           |                     |                       |                     |                                       |                       |                       |                       |                       |                     |                     |                     |                             |                     |                     |                     |                |                     |                     |                       |                       |                     |                     |                     |                                     |                     |                     |                     |                                                                                                                                                                                                                                                                                                                                                                                                                                                                                                                                                                                                                                                                                                             |                              |                       |                      |                                      |                     |                      |                            |                                                                                                                                                                                                                                                                                                                                                                                                                                                                                                                                                                                                                                                                                                                                                                                                     |      |
| Temporary                                | <b>-0.288</b> (0.145)                                                       | <b>-0.331</b> (0.234)                                                                               | 0.080 (0.163)                                                                                                                                                                                                                                                                                                                                                                                                                                                                                                                                                                                                                                                                                                                                                                                                                                                                                                                                                                                                                                                                                                                                                                                                                                                                                                                                                                                                                                                                                                                                                                                                                                                                                                                                                                                                                                                                                                                                                                                                                                                                                                                                                                                                                                                                                                                                                                                                                                                                                                                                                                                                                                                                                                                                                                                                                                                                                                                                                                                                                                                                                                    | 0.159 (0.247)                                                                                                                                                                                                                                                                                                                                                                                                                        |                                |                                                                                                                                                           |                                  |                 |                    |                     |                     |                        |                     |                     |                       |                           |                     |                       |                     |                                       |                       |                       |                       |                       |                     |                     |                     |                             |                     |                     |                     |                |                     |                     |                       |                       |                     |                     |                     |                                     |                     |                     |                     |                                                                                                                                                                                                                                                                                                                                                                                                                                                                                                                                                                                                                                                                                                             |                              |                       |                      |                                      |                     |                      |                            |                                                                                                                                                                                                                                                                                                                                                                                                                                                                                                                                                                                                                                                                                                                                                                                                     |      |
| Unemployed                               | <b>-0.423</b> (0.212)                                                       | -0.371 (0.326)                                                                                      | -0.160 (0.245)                                                                                                                                                                                                                                                                                                                                                                                                                                                                                                                                                                                                                                                                                                                                                                                                                                                                                                                                                                                                                                                                                                                                                                                                                                                                                                                                                                                                                                                                                                                                                                                                                                                                                                                                                                                                                                                                                                                                                                                                                                                                                                                                                                                                                                                                                                                                                                                                                                                                                                                                                                                                                                                                                                                                                                                                                                                                                                                                                                                                                                                                                                   | -0.456 (0.385)                                                                                                                                                                                                                                                                                                                                                                                                                       |                                |                                                                                                                                                           |                                  |                 |                    |                     |                     |                        |                     |                     |                       |                           |                     |                       |                     |                                       |                       |                       |                       |                       |                     |                     |                     |                             |                     |                     |                     |                |                     |                     |                       |                       |                     |                     |                     |                                     |                     |                     |                     |                                                                                                                                                                                                                                                                                                                                                                                                                                                                                                                                                                                                                                                                                                             |                              |                       |                      |                                      |                     |                      |                            |                                                                                                                                                                                                                                                                                                                                                                                                                                                                                                                                                                                                                                                                                                                                                                                                     |      |
| N =37,782 total observations             | Poor/very poor health                                                       | Not very poor health                                                                                |                                                                                                                                                                                                                                                                                                                                                                                                                                                                                                                                                                                                                                                                                                                                                                                                                                                                                                                                                                                                                                                                                                                                                                                                                                                                                                                                                                                                                                                                                                                                                                                                                                                                                                                                                                                                                                                                                                                                                                                                                                                                                                                                                                                                                                                                                                                                                                                                                                                                                                                                                                                                                                                                                                                                                                                                                                                                                                                                                                                                                                                                                                                  |                                                                                                                                                                                                                                                                                                                                                                                                                                      |                                |                                                                                                                                                           |                                  |                 |                    |                     |                     |                        |                     |                     |                       |                           |                     |                       |                     |                                       |                       |                       |                       |                       |                     |                     |                     |                             |                     |                     |                     |                |                     |                     |                       |                       |                     |                     |                     |                                     |                     |                     |                     |                                                                                                                                                                                                                                                                                                                                                                                                                                                                                                                                                                                                                                                                                                             |                              |                       |                      |                                      |                     |                      |                            |                                                                                                                                                                                                                                                                                                                                                                                                                                                                                                                                                                                                                                                                                                                                                                                                     |      |
| Temporary employment (7.72%) n= 2917     | (0.07% + 1.20%) 37                                                          | 2880                                                                                                |                                                                                                                                                                                                                                                                                                                                                                                                                                                                                                                                                                                                                                                                                                                                                                                                                                                                                                                                                                                                                                                                                                                                                                                                                                                                                                                                                                                                                                                                                                                                                                                                                                                                                                                                                                                                                                                                                                                                                                                                                                                                                                                                                                                                                                                                                                                                                                                                                                                                                                                                                                                                                                                                                                                                                                                                                                                                                                                                                                                                                                                                                                                  |                                                                                                                                                                                                                                                                                                                                                                                                                                      |                                |                                                                                                                                                           |                                  |                 |                    |                     |                     |                        |                     |                     |                       |                           |                     |                       |                     |                                       |                       |                       |                       |                       |                     |                     |                     |                             |                     |                     |                     |                |                     |                     |                       |                       |                     |                     |                     |                                     |                     |                     |                     |                                                                                                                                                                                                                                                                                                                                                                                                                                                                                                                                                                                                                                                                                                             |                              |                       |                      |                                      |                     |                      |                            |                                                                                                                                                                                                                                                                                                                                                                                                                                                                                                                                                                                                                                                                                                                                                                                                     |      |
| Unemployed (3.95%) n= 1492               | (0.47% + 3.96) 66                                                           | 1426                                                                                                |                                                                                                                                                                                                                                                                                                                                                                                                                                                                                                                                                                                                                                                                                                                                                                                                                                                                                                                                                                                                                                                                                                                                                                                                                                                                                                                                                                                                                                                                                                                                                                                                                                                                                                                                                                                                                                                                                                                                                                                                                                                                                                                                                                                                                                                                                                                                                                                                                                                                                                                                                                                                                                                                                                                                                                                                                                                                                                                                                                                                                                                                                                                  |                                                                                                                                                                                                                                                                                                                                                                                                                                      |                                |                                                                                                                                                           |                                  |                 |                    |                     |                     |                        |                     |                     |                       |                           |                     |                       |                     |                                       |                       |                       |                       |                       |                     |                     |                     |                             |                     |                     |                     |                |                     |                     |                       |                       |                     |                     |                     |                                     |                     |                     |                     |                                                                                                                                                                                                                                                                                                                                                                                                                                                                                                                                                                                                                                                                                                             |                              |                       |                      |                                      |                     |                      |                            |                                                                                                                                                                                                                                                                                                                                                                                                                                                                                                                                                                                                                                                                                                                                                                                                     |      |
| Park SJ et al. 2020<br>Cross sectional   | Korean National Health and Nutrition Survey, 2013 to 2017<br>15 to 59 years | Insecure employment<br>Mental health, general health, health behaviours                             | Association between employment status and health after adjusting for the explanatory variables. Odds ratios and 95% confidence intervals. Temporary job is reference<br><br><table border="0" style="width: 100%; border-collapse: collapse;"> <tr> <td>Health related variable</td> <td style="text-align: center;">Unemployed vs temporary<br/>All</td> <td style="text-align: center;">Unemployed vs temporary<br/>Men</td> <td style="text-align: center;">Unemployed vs temporary<br/>Women</td> </tr> <tr> <td>Current smoking</td> <td style="text-align: center;">0.88 (0.70 - 1.11)</td> <td style="text-align: center;">0.90 (0.70 to 1.16)</td> <td style="text-align: center;">0.90 (0.59 to 1.38)</td> </tr> <tr> <td>High risky alcohol use</td> <td style="text-align: center;">0.70 (0.54 to 0.91)</td> <td style="text-align: center;">0.66 (0.47 to 0.92)</td> <td style="text-align: center;">0.86 (0.58 to 1.27)</td> </tr> <tr> <td>Mental health service use</td> <td style="text-align: center;">1.49 (0.92 to 2.42)</td> <td style="text-align: center;">2.33 (1.10 to 4.95)</td> <td style="text-align: center;">1.10 (0.57 to 2.13)</td> </tr> </table><br><table border="0" style="width: 100%; border-collapse: collapse;"> <tr> <td>Health related QOL (coefficient + SE)</td> <td style="text-align: center;">-0.002 (0.002)</td> <td style="text-align: center;">-0.003 (0.003)</td> <td style="text-align: center;">-0.001 (0.003)</td> </tr> <tr> <td>Perceived poor health</td> <td style="text-align: center;">1.32 (1.06 to 1.65)</td> <td style="text-align: center;">1.28 (0.92 to 1.89)</td> <td style="text-align: center;">1.34 (0.98 to 1.83)</td> </tr> <tr> <td>High daily perceived stress</td> <td style="text-align: center;">0.85 (0.72 to 1.01)</td> <td style="text-align: center;">0.84 (0.64 to 1.10)</td> <td style="text-align: center;">0.89 (0.72 to 1.10)</td> </tr> <tr> <td>Depressed mood</td> <td style="text-align: center;">1.36 (1.02 to 1.81)</td> <td style="text-align: center;">1.35 (0.85 to 2.14)</td> <td style="text-align: center;">1.35 (0.93 to 1.97)</td> </tr> <tr> <td>Depression symptoms</td> <td style="text-align: center;">1.22 (0.76 to 1.97)</td> <td style="text-align: center;">0.68 (0.26 to 1.77)</td> <td style="text-align: center;">1.66 (0.93 to 1.97)</td> </tr> <tr> <td>Ever been diagnosed with depression</td> <td style="text-align: center;">0.85 (0.58 to 1.27)</td> <td style="text-align: center;">1.19 (0.61 to 2.32)</td> <td style="text-align: center;">0.65 (0.40 to 1.06)</td> </tr> <tr> <td>Suicide ideation or planning</td> <td style="text-align: center;">1.14 (0.73 to 1.77)</td> <td style="text-align: center;">1.65 (0.87 to 3.14)</td> <td style="text-align: center;">0.80 (0.43 to 1.47)</td> </tr> <tr> <td>Suicide attempt</td> <td style="text-align: center;">0.95 (0.30 to 3.04)</td> <td style="text-align: center;">2.42 (0.52 to 11.13)</td> <td style="text-align: center;">No result</td> </tr> </table><br>Adjusted for age, education, household income and marital status | Health related variable                                                                                                                                                                                                                                                                                                                                                                                                              | Unemployed vs temporary<br>All | Unemployed vs temporary<br>Men                                                                                                                            | Unemployed vs temporary<br>Women | Current smoking | 0.88 (0.70 - 1.11) | 0.90 (0.70 to 1.16) | 0.90 (0.59 to 1.38) | High risky alcohol use | 0.70 (0.54 to 0.91) | 0.66 (0.47 to 0.92) | 0.86 (0.58 to 1.27)   | Mental health service use | 1.49 (0.92 to 2.42) | 2.33 (1.10 to 4.95)   | 1.10 (0.57 to 2.13) | Health related QOL (coefficient + SE) | -0.002 (0.002)        | -0.003 (0.003)        | -0.001 (0.003)        | Perceived poor health | 1.32 (1.06 to 1.65) | 1.28 (0.92 to 1.89) | 1.34 (0.98 to 1.83) | High daily perceived stress | 0.85 (0.72 to 1.01) | 0.84 (0.64 to 1.10) | 0.89 (0.72 to 1.10) | Depressed mood | 1.36 (1.02 to 1.81) | 1.35 (0.85 to 2.14) | 1.35 (0.93 to 1.97)   | Depression symptoms   | 1.22 (0.76 to 1.97) | 0.68 (0.26 to 1.77) | 1.66 (0.93 to 1.97) | Ever been diagnosed with depression | 0.85 (0.58 to 1.27) | 1.19 (0.61 to 2.32) | 0.65 (0.40 to 1.06) | Suicide ideation or planning                                                                                                                                                                                                                                                                                                                                                                                                                                                                                                                                                                                                                                                                                | 1.14 (0.73 to 1.77)          | 1.65 (0.87 to 3.14)   | 0.80 (0.43 to 1.47)  | Suicide attempt                      | 0.95 (0.30 to 3.04) | 2.42 (0.52 to 11.13) | No result                  | No: Compared to those in temporary employment those who were unemployed were less likely to report current smoking, risky alcohol consumption, high daily perceived stress, to have ever been diagnosed with depression or to report a suicide attempt but more likely to report mental health service use, depression symptoms or suicide ideation or planning. Only the difference in reported alcohol consumption is likely to be statistically significant.<br><br>Yes: Compared to those in temporary employment, those who were unemployed were more likely to report perceived poor health, this difference may be statistically significant<br><br>Unemployed people were more like to report a lower health related quality of life score when compared with those in temporary employment |      |
| Health related variable                  | Unemployed vs temporary<br>All                                              | Unemployed vs temporary<br>Men                                                                      | Unemployed vs temporary<br>Women                                                                                                                                                                                                                                                                                                                                                                                                                                                                                                                                                                                                                                                                                                                                                                                                                                                                                                                                                                                                                                                                                                                                                                                                                                                                                                                                                                                                                                                                                                                                                                                                                                                                                                                                                                                                                                                                                                                                                                                                                                                                                                                                                                                                                                                                                                                                                                                                                                                                                                                                                                                                                                                                                                                                                                                                                                                                                                                                                                                                                                                                                 |                                                                                                                                                                                                                                                                                                                                                                                                                                      |                                |                                                                                                                                                           |                                  |                 |                    |                     |                     |                        |                     |                     |                       |                           |                     |                       |                     |                                       |                       |                       |                       |                       |                     |                     |                     |                             |                     |                     |                     |                |                     |                     |                       |                       |                     |                     |                     |                                     |                     |                     |                     |                                                                                                                                                                                                                                                                                                                                                                                                                                                                                                                                                                                                                                                                                                             |                              |                       |                      |                                      |                     |                      |                            |                                                                                                                                                                                                                                                                                                                                                                                                                                                                                                                                                                                                                                                                                                                                                                                                     |      |
| Current smoking                          | 0.88 (0.70 - 1.11)                                                          | 0.90 (0.70 to 1.16)                                                                                 | 0.90 (0.59 to 1.38)                                                                                                                                                                                                                                                                                                                                                                                                                                                                                                                                                                                                                                                                                                                                                                                                                                                                                                                                                                                                                                                                                                                                                                                                                                                                                                                                                                                                                                                                                                                                                                                                                                                                                                                                                                                                                                                                                                                                                                                                                                                                                                                                                                                                                                                                                                                                                                                                                                                                                                                                                                                                                                                                                                                                                                                                                                                                                                                                                                                                                                                                                              |                                                                                                                                                                                                                                                                                                                                                                                                                                      |                                |                                                                                                                                                           |                                  |                 |                    |                     |                     |                        |                     |                     |                       |                           |                     |                       |                     |                                       |                       |                       |                       |                       |                     |                     |                     |                             |                     |                     |                     |                |                     |                     |                       |                       |                     |                     |                     |                                     |                     |                     |                     |                                                                                                                                                                                                                                                                                                                                                                                                                                                                                                                                                                                                                                                                                                             |                              |                       |                      |                                      |                     |                      |                            |                                                                                                                                                                                                                                                                                                                                                                                                                                                                                                                                                                                                                                                                                                                                                                                                     |      |
| High risky alcohol use                   | 0.70 (0.54 to 0.91)                                                         | 0.66 (0.47 to 0.92)                                                                                 | 0.86 (0.58 to 1.27)                                                                                                                                                                                                                                                                                                                                                                                                                                                                                                                                                                                                                                                                                                                                                                                                                                                                                                                                                                                                                                                                                                                                                                                                                                                                                                                                                                                                                                                                                                                                                                                                                                                                                                                                                                                                                                                                                                                                                                                                                                                                                                                                                                                                                                                                                                                                                                                                                                                                                                                                                                                                                                                                                                                                                                                                                                                                                                                                                                                                                                                                                              |                                                                                                                                                                                                                                                                                                                                                                                                                                      |                                |                                                                                                                                                           |                                  |                 |                    |                     |                     |                        |                     |                     |                       |                           |                     |                       |                     |                                       |                       |                       |                       |                       |                     |                     |                     |                             |                     |                     |                     |                |                     |                     |                       |                       |                     |                     |                     |                                     |                     |                     |                     |                                                                                                                                                                                                                                                                                                                                                                                                                                                                                                                                                                                                                                                                                                             |                              |                       |                      |                                      |                     |                      |                            |                                                                                                                                                                                                                                                                                                                                                                                                                                                                                                                                                                                                                                                                                                                                                                                                     |      |
| Mental health service use                | 1.49 (0.92 to 2.42)                                                         | 2.33 (1.10 to 4.95)                                                                                 | 1.10 (0.57 to 2.13)                                                                                                                                                                                                                                                                                                                                                                                                                                                                                                                                                                                                                                                                                                                                                                                                                                                                                                                                                                                                                                                                                                                                                                                                                                                                                                                                                                                                                                                                                                                                                                                                                                                                                                                                                                                                                                                                                                                                                                                                                                                                                                                                                                                                                                                                                                                                                                                                                                                                                                                                                                                                                                                                                                                                                                                                                                                                                                                                                                                                                                                                                              |                                                                                                                                                                                                                                                                                                                                                                                                                                      |                                |                                                                                                                                                           |                                  |                 |                    |                     |                     |                        |                     |                     |                       |                           |                     |                       |                     |                                       |                       |                       |                       |                       |                     |                     |                     |                             |                     |                     |                     |                |                     |                     |                       |                       |                     |                     |                     |                                     |                     |                     |                     |                                                                                                                                                                                                                                                                                                                                                                                                                                                                                                                                                                                                                                                                                                             |                              |                       |                      |                                      |                     |                      |                            |                                                                                                                                                                                                                                                                                                                                                                                                                                                                                                                                                                                                                                                                                                                                                                                                     |      |
| Health related QOL (coefficient + SE)    | -0.002 (0.002)                                                              | -0.003 (0.003)                                                                                      | -0.001 (0.003)                                                                                                                                                                                                                                                                                                                                                                                                                                                                                                                                                                                                                                                                                                                                                                                                                                                                                                                                                                                                                                                                                                                                                                                                                                                                                                                                                                                                                                                                                                                                                                                                                                                                                                                                                                                                                                                                                                                                                                                                                                                                                                                                                                                                                                                                                                                                                                                                                                                                                                                                                                                                                                                                                                                                                                                                                                                                                                                                                                                                                                                                                                   |                                                                                                                                                                                                                                                                                                                                                                                                                                      |                                |                                                                                                                                                           |                                  |                 |                    |                     |                     |                        |                     |                     |                       |                           |                     |                       |                     |                                       |                       |                       |                       |                       |                     |                     |                     |                             |                     |                     |                     |                |                     |                     |                       |                       |                     |                     |                     |                                     |                     |                     |                     |                                                                                                                                                                                                                                                                                                                                                                                                                                                                                                                                                                                                                                                                                                             |                              |                       |                      |                                      |                     |                      |                            |                                                                                                                                                                                                                                                                                                                                                                                                                                                                                                                                                                                                                                                                                                                                                                                                     |      |
| Perceived poor health                    | 1.32 (1.06 to 1.65)                                                         | 1.28 (0.92 to 1.89)                                                                                 | 1.34 (0.98 to 1.83)                                                                                                                                                                                                                                                                                                                                                                                                                                                                                                                                                                                                                                                                                                                                                                                                                                                                                                                                                                                                                                                                                                                                                                                                                                                                                                                                                                                                                                                                                                                                                                                                                                                                                                                                                                                                                                                                                                                                                                                                                                                                                                                                                                                                                                                                                                                                                                                                                                                                                                                                                                                                                                                                                                                                                                                                                                                                                                                                                                                                                                                                                              |                                                                                                                                                                                                                                                                                                                                                                                                                                      |                                |                                                                                                                                                           |                                  |                 |                    |                     |                     |                        |                     |                     |                       |                           |                     |                       |                     |                                       |                       |                       |                       |                       |                     |                     |                     |                             |                     |                     |                     |                |                     |                     |                       |                       |                     |                     |                     |                                     |                     |                     |                     |                                                                                                                                                                                                                                                                                                                                                                                                                                                                                                                                                                                                                                                                                                             |                              |                       |                      |                                      |                     |                      |                            |                                                                                                                                                                                                                                                                                                                                                                                                                                                                                                                                                                                                                                                                                                                                                                                                     |      |
| High daily perceived stress              | 0.85 (0.72 to 1.01)                                                         | 0.84 (0.64 to 1.10)                                                                                 | 0.89 (0.72 to 1.10)                                                                                                                                                                                                                                                                                                                                                                                                                                                                                                                                                                                                                                                                                                                                                                                                                                                                                                                                                                                                                                                                                                                                                                                                                                                                                                                                                                                                                                                                                                                                                                                                                                                                                                                                                                                                                                                                                                                                                                                                                                                                                                                                                                                                                                                                                                                                                                                                                                                                                                                                                                                                                                                                                                                                                                                                                                                                                                                                                                                                                                                                                              |                                                                                                                                                                                                                                                                                                                                                                                                                                      |                                |                                                                                                                                                           |                                  |                 |                    |                     |                     |                        |                     |                     |                       |                           |                     |                       |                     |                                       |                       |                       |                       |                       |                     |                     |                     |                             |                     |                     |                     |                |                     |                     |                       |                       |                     |                     |                     |                                     |                     |                     |                     |                                                                                                                                                                                                                                                                                                                                                                                                                                                                                                                                                                                                                                                                                                             |                              |                       |                      |                                      |                     |                      |                            |                                                                                                                                                                                                                                                                                                                                                                                                                                                                                                                                                                                                                                                                                                                                                                                                     |      |
| Depressed mood                           | 1.36 (1.02 to 1.81)                                                         | 1.35 (0.85 to 2.14)                                                                                 | 1.35 (0.93 to 1.97)                                                                                                                                                                                                                                                                                                                                                                                                                                                                                                                                                                                                                                                                                                                                                                                                                                                                                                                                                                                                                                                                                                                                                                                                                                                                                                                                                                                                                                                                                                                                                                                                                                                                                                                                                                                                                                                                                                                                                                                                                                                                                                                                                                                                                                                                                                                                                                                                                                                                                                                                                                                                                                                                                                                                                                                                                                                                                                                                                                                                                                                                                              |                                                                                                                                                                                                                                                                                                                                                                                                                                      |                                |                                                                                                                                                           |                                  |                 |                    |                     |                     |                        |                     |                     |                       |                           |                     |                       |                     |                                       |                       |                       |                       |                       |                     |                     |                     |                             |                     |                     |                     |                |                     |                     |                       |                       |                     |                     |                     |                                     |                     |                     |                     |                                                                                                                                                                                                                                                                                                                                                                                                                                                                                                                                                                                                                                                                                                             |                              |                       |                      |                                      |                     |                      |                            |                                                                                                                                                                                                                                                                                                                                                                                                                                                                                                                                                                                                                                                                                                                                                                                                     |      |
| Depression symptoms                      | 1.22 (0.76 to 1.97)                                                         | 0.68 (0.26 to 1.77)                                                                                 | 1.66 (0.93 to 1.97)                                                                                                                                                                                                                                                                                                                                                                                                                                                                                                                                                                                                                                                                                                                                                                                                                                                                                                                                                                                                                                                                                                                                                                                                                                                                                                                                                                                                                                                                                                                                                                                                                                                                                                                                                                                                                                                                                                                                                                                                                                                                                                                                                                                                                                                                                                                                                                                                                                                                                                                                                                                                                                                                                                                                                                                                                                                                                                                                                                                                                                                                                              |                                                                                                                                                                                                                                                                                                                                                                                                                                      |                                |                                                                                                                                                           |                                  |                 |                    |                     |                     |                        |                     |                     |                       |                           |                     |                       |                     |                                       |                       |                       |                       |                       |                     |                     |                     |                             |                     |                     |                     |                |                     |                     |                       |                       |                     |                     |                     |                                     |                     |                     |                     |                                                                                                                                                                                                                                                                                                                                                                                                                                                                                                                                                                                                                                                                                                             |                              |                       |                      |                                      |                     |                      |                            |                                                                                                                                                                                                                                                                                                                                                                                                                                                                                                                                                                                                                                                                                                                                                                                                     |      |
| Ever been diagnosed with depression      | 0.85 (0.58 to 1.27)                                                         | 1.19 (0.61 to 2.32)                                                                                 | 0.65 (0.40 to 1.06)                                                                                                                                                                                                                                                                                                                                                                                                                                                                                                                                                                                                                                                                                                                                                                                                                                                                                                                                                                                                                                                                                                                                                                                                                                                                                                                                                                                                                                                                                                                                                                                                                                                                                                                                                                                                                                                                                                                                                                                                                                                                                                                                                                                                                                                                                                                                                                                                                                                                                                                                                                                                                                                                                                                                                                                                                                                                                                                                                                                                                                                                                              |                                                                                                                                                                                                                                                                                                                                                                                                                                      |                                |                                                                                                                                                           |                                  |                 |                    |                     |                     |                        |                     |                     |                       |                           |                     |                       |                     |                                       |                       |                       |                       |                       |                     |                     |                     |                             |                     |                     |                     |                |                     |                     |                       |                       |                     |                     |                     |                                     |                     |                     |                     |                                                                                                                                                                                                                                                                                                                                                                                                                                                                                                                                                                                                                                                                                                             |                              |                       |                      |                                      |                     |                      |                            |                                                                                                                                                                                                                                                                                                                                                                                                                                                                                                                                                                                                                                                                                                                                                                                                     |      |
| Suicide ideation or planning             | 1.14 (0.73 to 1.77)                                                         | 1.65 (0.87 to 3.14)                                                                                 | 0.80 (0.43 to 1.47)                                                                                                                                                                                                                                                                                                                                                                                                                                                                                                                                                                                                                                                                                                                                                                                                                                                                                                                                                                                                                                                                                                                                                                                                                                                                                                                                                                                                                                                                                                                                                                                                                                                                                                                                                                                                                                                                                                                                                                                                                                                                                                                                                                                                                                                                                                                                                                                                                                                                                                                                                                                                                                                                                                                                                                                                                                                                                                                                                                                                                                                                                              |                                                                                                                                                                                                                                                                                                                                                                                                                                      |                                |                                                                                                                                                           |                                  |                 |                    |                     |                     |                        |                     |                     |                       |                           |                     |                       |                     |                                       |                       |                       |                       |                       |                     |                     |                     |                             |                     |                     |                     |                |                     |                     |                       |                       |                     |                     |                     |                                     |                     |                     |                     |                                                                                                                                                                                                                                                                                                                                                                                                                                                                                                                                                                                                                                                                                                             |                              |                       |                      |                                      |                     |                      |                            |                                                                                                                                                                                                                                                                                                                                                                                                                                                                                                                                                                                                                                                                                                                                                                                                     |      |
| Suicide attempt                          | 0.95 (0.30 to 3.04)                                                         | 2.42 (0.52 to 11.13)                                                                                | No result                                                                                                                                                                                                                                                                                                                                                                                                                                                                                                                                                                                                                                                                                                                                                                                                                                                                                                                                                                                                                                                                                                                                                                                                                                                                                                                                                                                                                                                                                                                                                                                                                                                                                                                                                                                                                                                                                                                                                                                                                                                                                                                                                                                                                                                                                                                                                                                                                                                                                                                                                                                                                                                                                                                                                                                                                                                                                                                                                                                                                                                                                                        |                                                                                                                                                                                                                                                                                                                                                                                                                                      |                                |                                                                                                                                                           |                                  |                 |                    |                     |                     |                        |                     |                     |                       |                           |                     |                       |                     |                                       |                       |                       |                       |                       |                     |                     |                     |                             |                     |                     |                     |                |                     |                     |                       |                       |                     |                     |                     |                                     |                     |                     |                     |                                                                                                                                                                                                                                                                                                                                                                                                                                                                                                                                                                                                                                                                                                             |                              |                       |                      |                                      |                     |                      |                            |                                                                                                                                                                                                                                                                                                                                                                                                                                                                                                                                                                                                                                                                                                                                                                                                     |      |
| Scheuring S et al. 2021<br>Cohort        | German Socio-Economic panel 1995 to 2017<br>18 to 65 years                  | Fixed term employment<br>Life satisfaction                                                          | Spill-over effects of fixed-term employment on the well-being of partners (life satisfaction), transition from unemployment to fixed-term employment. Beta coefficient (figure 1, page 11)<br><br>For transitions by men beta coefficient 0.30, error bars do not cross zero<br><br>For transition by women beta coefficient 0.08, error bars cross zero                                                                                                                                                                                                                                                                                                                                                                                                                                                                                                                                                                                                                                                                                                                                                                                                                                                                                                                                                                                                                                                                                                                                                                                                                                                                                                                                                                                                                                                                                                                                                                                                                                                                                                                                                                                                                                                                                                                                                                                                                                                                                                                                                                                                                                                                                                                                                                                                                                                                                                                                                                                                                                                                                                                                                         | Yes: For women their partners transition from unemployment to fixed term employment was associated with a significant improvement in their life satisfaction compared with their partners remaining unemployed<br><br>No: For men their partners transition from unemployment to fixed term employment was not associated with a significant improvement in their life satisfaction compared with their partner remaining unemployed |                                |                                                                                                                                                           |                                  |                 |                    |                     |                     |                        |                     |                     |                       |                           |                     |                       |                     |                                       |                       |                       |                       |                       |                     |                     |                     |                             |                     |                     |                     |                |                     |                     |                       |                       |                     |                     |                     |                                     |                     |                     |                     |                                                                                                                                                                                                                                                                                                                                                                                                                                                                                                                                                                                                                                                                                                             |                              |                       |                      |                                      |                     |                      |                            |                                                                                                                                                                                                                                                                                                                                                                                                                                                                                                                                                                                                                                                                                                                                                                                                     |      |
| Sumner RC et al. 2020<br>Cross sectional | Understanding Society Survey, UK, 2010 to 2011<br>16 to 64 years            | Insecure employment<br>Biomarkers C-reactive protein and fibrinogen                                 | Multiple linear regressions for the association between employment subtypes and CRP and fibrinogen Reference is unemployment Beta coefficient and SE<br><br><table border="0" style="width: 100%; border-collapse: collapse;"> <tr> <td style="text-align: center;">C-reactive protein</td> <td style="text-align: center;">Fibrinogen</td> </tr> </table>                                                                                                                                                                                                                                                                                                                                                                                                                                                                                                                                                                                                                                                                                                                                                                                                                                                                                                                                                                                                                                                                                                                                                                                                                                                                                                                                                                                                                                                                                                                                                                                                                                                                                                                                                                                                                                                                                                                                                                                                                                                                                                                                                                                                                                                                                                                                                                                                                                                                                                                                                                                                                                                                                                                                                       | C-reactive protein                                                                                                                                                                                                                                                                                                                                                                                                                   | Fibrinogen                     | No: There was no significant difference in C-reactive protein or fibrinogen levels between those who were unemployed and those employed in temporary jobs |                                  |                 |                    |                     |                     |                        |                     |                     |                       |                           |                     |                       |                     |                                       |                       |                       |                       |                       |                     |                     |                     |                             |                     |                     |                     |                |                     |                     |                       |                       |                     |                     |                     |                                     |                     |                     |                     |                                                                                                                                                                                                                                                                                                                                                                                                                                                                                                                                                                                                                                                                                                             |                              |                       |                      |                                      |                     |                      |                            |                                                                                                                                                                                                                                                                                                                                                                                                                                                                                                                                                                                                                                                                                                                                                                                                     |      |
| C-reactive protein                       | Fibrinogen                                                                  |                                                                                                     |                                                                                                                                                                                                                                                                                                                                                                                                                                                                                                                                                                                                                                                                                                                                                                                                                                                                                                                                                                                                                                                                                                                                                                                                                                                                                                                                                                                                                                                                                                                                                                                                                                                                                                                                                                                                                                                                                                                                                                                                                                                                                                                                                                                                                                                                                                                                                                                                                                                                                                                                                                                                                                                                                                                                                                                                                                                                                                                                                                                                                                                                                                                  |                                                                                                                                                                                                                                                                                                                                                                                                                                      |                                |                                                                                                                                                           |                                  |                 |                    |                     |                     |                        |                     |                     |                       |                           |                     |                       |                     |                                       |                       |                       |                       |                       |                     |                     |                     |                             |                     |                     |                     |                |                     |                     |                       |                       |                     |                     |                     |                                     |                     |                     |                     |                                                                                                                                                                                                                                                                                                                                                                                                                                                                                                                                                                                                                                                                                                             |                              |                       |                      |                                      |                     |                      |                            |                                                                                                                                                                                                                                                                                                                                                                                                                                                                                                                                                                                                                                                                                                                                                                                                     |      |

| Reference/<br>Study design                                                 | Data source/<br>Population<br>range                                      | Poor/bad job<br>definition<br>Outcome                                                                                 | Results from paper                                                                                                                                                                                                                                                                                                                                                                                                                                                                                                                                                                                                                                                                                                                                                                                                                                                                                                                                                                                                                                                                                                                                                                                                                                                                                                                                                                                                                                                                                                                                                                                                                                                                   | Is any job better than no job?<br>Where OR has been calculated by OES exposure is bad/poor job, is unadjusted and data used to calculate may have been derived from percentages in study results tables                                                                                                                                                                                                                                                                                                                                                                             |     |                  |                     |                                                   |    |                       |                   |                       |                   |                          |                     |                    |                     |                     |                              |                     |                     |                     |                     |                            |                     |                     |                     |                     |                            |                     |                     |                     |                     |                                                                                                                                                                                                                                                                                                                                                                                                                                                                                                                                                                             |
|----------------------------------------------------------------------------|--------------------------------------------------------------------------|-----------------------------------------------------------------------------------------------------------------------|--------------------------------------------------------------------------------------------------------------------------------------------------------------------------------------------------------------------------------------------------------------------------------------------------------------------------------------------------------------------------------------------------------------------------------------------------------------------------------------------------------------------------------------------------------------------------------------------------------------------------------------------------------------------------------------------------------------------------------------------------------------------------------------------------------------------------------------------------------------------------------------------------------------------------------------------------------------------------------------------------------------------------------------------------------------------------------------------------------------------------------------------------------------------------------------------------------------------------------------------------------------------------------------------------------------------------------------------------------------------------------------------------------------------------------------------------------------------------------------------------------------------------------------------------------------------------------------------------------------------------------------------------------------------------------------|-------------------------------------------------------------------------------------------------------------------------------------------------------------------------------------------------------------------------------------------------------------------------------------------------------------------------------------------------------------------------------------------------------------------------------------------------------------------------------------------------------------------------------------------------------------------------------------|-----|------------------|---------------------|---------------------------------------------------|----|-----------------------|-------------------|-----------------------|-------------------|--------------------------|---------------------|--------------------|---------------------|---------------------|------------------------------|---------------------|---------------------|---------------------|---------------------|----------------------------|---------------------|---------------------|---------------------|---------------------|----------------------------|---------------------|---------------------|---------------------|---------------------|-----------------------------------------------------------------------------------------------------------------------------------------------------------------------------------------------------------------------------------------------------------------------------------------------------------------------------------------------------------------------------------------------------------------------------------------------------------------------------------------------------------------------------------------------------------------------------|
|                                                                            |                                                                          |                                                                                                                       | Permanent -0.04 (0.08) p = 0.625      -0.13 (0.04) p = 0.004<br>Temporary -0.03 (0.13) p = 0.796      -0.04 (0.06) p = 0.467<br><br>Adjusted for individual, socio-economic and health behaviours and conditions characteristics                                                                                                                                                                                                                                                                                                                                                                                                                                                                                                                                                                                                                                                                                                                                                                                                                                                                                                                                                                                                                                                                                                                                                                                                                                                                                                                                                                                                                                                     |                                                                                                                                                                                                                                                                                                                                                                                                                                                                                                                                                                                     |     |                  |                     |                                                   |    |                       |                   |                       |                   |                          |                     |                    |                     |                     |                              |                     |                     |                     |                     |                            |                     |                     |                     |                     |                            |                     |                     |                     |                     |                                                                                                                                                                                                                                                                                                                                                                                                                                                                                                                                                                             |
| Van Aerden K, Gadeyne S, Vanrolen C. 2017<br><br>Cross sectional           | Belgian Generations and Gender Study, 2008 to 2010<br><br>18 to 64 years | Precarious employment; unstable, low income and involuntary part-time employment<br><br>Mental health, general health | Relationship between labour market position and poor general health. Odds ratios and 95% confidence intervals. Reference is standard jobs<br><br>Precarious jobs 1.53 (1.04 to 2.26)*<br><br>Unemployed 1.85 (1.29 to 2.65)**<br><br>Relations between labour market position and poor mental health. Odds ratios and 95% confidence intervals. Reference is standard jobs<br><br>Precarious jobs 1.74 (1.10 to 2.75)*<br><br>Unemployed 2.70*** (1.77 to 4.13)<br><br>Adjusted for sex, age, household situation and social support<br>* p <0.05 ** p<0.01 *** p<0.001                                                                                                                                                                                                                                                                                                                                                                                                                                                                                                                                                                                                                                                                                                                                                                                                                                                                                                                                                                                                                                                                                                              | No: Those who were unemployed were more likely to report poor general and mental health than those in precarious jobs, but these differences are unlikely to be statistically significant                                                                                                                                                                                                                                                                                                                                                                                           |     |                  |                     |                                                   |    |                       |                   |                       |                   |                          |                     |                    |                     |                     |                              |                     |                     |                     |                     |                            |                     |                     |                     |                     |                            |                     |                     |                     |                     |                                                                                                                                                                                                                                                                                                                                                                                                                                                                                                                                                                             |
| Yoo et al. 2016<br><br>Cohort                                              | Korean Welfare Panel Study 2008 to 2011<br><br>18 years and above        | Insecure employment<br><br>Depression                                                                                 | Association between employment status change and depression. Odds ratios and 95% confidence intervals. Reference is permanent to permanent<br><br>Employment status<br>Precarious to precarious 1.54 (1.30 to 1.83)<br>Unemployment to unemployment 1.45 (1.23 to 1.70)<br>Unemployment to precarious 1.34 (1.07 to 1.68)<br>Precarious to unemployment 1.65 (1.32 to 2.06)<br><br>Association between employment status change and depression by sex and head of household. Odds ratios and 95% confidence intervals). Reference is permanent to permanent<br><br><table style="margin-left: auto; margin-right: auto;"> <thead> <tr> <th></th> <th colspan="2">Men</th> <th colspan="2">Women</th> </tr> <tr> <th></th> <th>Non-head of household</th> <th>Head of household</th> <th>Non-head of household</th> <th>Head of household</th> </tr> </thead> <tbody> <tr> <td>Precarious to precarious</td> <td>2.36 (1.26 to 4.45)</td> <td>1.47 (1.09 to 2.0)</td> <td>1.26 (0.97 to 1.65)</td> <td>2.07 (1.28 to 3.36)</td> </tr> <tr> <td>Unemployment to unemployment</td> <td>1.84 (1.02 to 3.32)</td> <td>1.72 (1.21 to 2.45)</td> <td>1.03 (0.81 to 1.30)</td> <td>2.71 (1.63 to 4.51)</td> </tr> <tr> <td>Unemployment to precarious</td> <td>2.65 (1.29 to 5.45)</td> <td>1.22 (0.74 to 2.02)</td> <td>0.93 (0.66 to 1.29)</td> <td>2.04 (1.12 to 3.69)</td> </tr> <tr> <td>Precarious to unemployment</td> <td>2.33 (1.11 to 4.91)</td> <td>1.64 (1.05 to 2.58)</td> <td>1.39 (0.99 to 1.95)</td> <td>1.83 (1.02 to 3.30)</td> </tr> </tbody> </table> Adjusted for age, sex, marital status, region, education, self-rated health, smoking, alcohol, lag(CES-D) and year |                                                                                                                                                                                                                                                                                                                                                                                                                                                                                                                                                                                     | Men |                  | Women               |                                                   |    | Non-head of household | Head of household | Non-head of household | Head of household | Precarious to precarious | 2.36 (1.26 to 4.45) | 1.47 (1.09 to 2.0) | 1.26 (0.97 to 1.65) | 2.07 (1.28 to 3.36) | Unemployment to unemployment | 1.84 (1.02 to 3.32) | 1.72 (1.21 to 2.45) | 1.03 (0.81 to 1.30) | 2.71 (1.63 to 4.51) | Unemployment to precarious | 2.65 (1.29 to 5.45) | 1.22 (0.74 to 2.02) | 0.93 (0.66 to 1.29) | 2.04 (1.12 to 3.69) | Precarious to unemployment | 2.33 (1.11 to 4.91) | 1.64 (1.05 to 2.58) | 1.39 (0.99 to 1.95) | 1.83 (1.02 to 3.30) | No: Those who remained in precarious employment at baseline and follow up were more likely to have depression than those who were unemployed at baseline and follow up but the difference is unlikely to be significant. Those who moved from unemployment to precarious employment were more likely to have depression than those who moved from precarious employment to unemployment but this difference is unlikely to be statistically significant<br><br>(NB not limited to new onset depression but the analysis controlled for the previous years depression score) |
|                                                                            | Men                                                                      |                                                                                                                       | Women                                                                                                                                                                                                                                                                                                                                                                                                                                                                                                                                                                                                                                                                                                                                                                                                                                                                                                                                                                                                                                                                                                                                                                                                                                                                                                                                                                                                                                                                                                                                                                                                                                                                                |                                                                                                                                                                                                                                                                                                                                                                                                                                                                                                                                                                                     |     |                  |                     |                                                   |    |                       |                   |                       |                   |                          |                     |                    |                     |                     |                              |                     |                     |                     |                     |                            |                     |                     |                     |                     |                            |                     |                     |                     |                     |                                                                                                                                                                                                                                                                                                                                                                                                                                                                                                                                                                             |
|                                                                            | Non-head of household                                                    | Head of household                                                                                                     | Non-head of household                                                                                                                                                                                                                                                                                                                                                                                                                                                                                                                                                                                                                                                                                                                                                                                                                                                                                                                                                                                                                                                                                                                                                                                                                                                                                                                                                                                                                                                                                                                                                                                                                                                                | Head of household                                                                                                                                                                                                                                                                                                                                                                                                                                                                                                                                                                   |     |                  |                     |                                                   |    |                       |                   |                       |                   |                          |                     |                    |                     |                     |                              |                     |                     |                     |                     |                            |                     |                     |                     |                     |                            |                     |                     |                     |                     |                                                                                                                                                                                                                                                                                                                                                                                                                                                                                                                                                                             |
| Precarious to precarious                                                   | 2.36 (1.26 to 4.45)                                                      | 1.47 (1.09 to 2.0)                                                                                                    | 1.26 (0.97 to 1.65)                                                                                                                                                                                                                                                                                                                                                                                                                                                                                                                                                                                                                                                                                                                                                                                                                                                                                                                                                                                                                                                                                                                                                                                                                                                                                                                                                                                                                                                                                                                                                                                                                                                                  | 2.07 (1.28 to 3.36)                                                                                                                                                                                                                                                                                                                                                                                                                                                                                                                                                                 |     |                  |                     |                                                   |    |                       |                   |                       |                   |                          |                     |                    |                     |                     |                              |                     |                     |                     |                     |                            |                     |                     |                     |                     |                            |                     |                     |                     |                     |                                                                                                                                                                                                                                                                                                                                                                                                                                                                                                                                                                             |
| Unemployment to unemployment                                               | 1.84 (1.02 to 3.32)                                                      | 1.72 (1.21 to 2.45)                                                                                                   | 1.03 (0.81 to 1.30)                                                                                                                                                                                                                                                                                                                                                                                                                                                                                                                                                                                                                                                                                                                                                                                                                                                                                                                                                                                                                                                                                                                                                                                                                                                                                                                                                                                                                                                                                                                                                                                                                                                                  | 2.71 (1.63 to 4.51)                                                                                                                                                                                                                                                                                                                                                                                                                                                                                                                                                                 |     |                  |                     |                                                   |    |                       |                   |                       |                   |                          |                     |                    |                     |                     |                              |                     |                     |                     |                     |                            |                     |                     |                     |                     |                            |                     |                     |                     |                     |                                                                                                                                                                                                                                                                                                                                                                                                                                                                                                                                                                             |
| Unemployment to precarious                                                 | 2.65 (1.29 to 5.45)                                                      | 1.22 (0.74 to 2.02)                                                                                                   | 0.93 (0.66 to 1.29)                                                                                                                                                                                                                                                                                                                                                                                                                                                                                                                                                                                                                                                                                                                                                                                                                                                                                                                                                                                                                                                                                                                                                                                                                                                                                                                                                                                                                                                                                                                                                                                                                                                                  | 2.04 (1.12 to 3.69)                                                                                                                                                                                                                                                                                                                                                                                                                                                                                                                                                                 |     |                  |                     |                                                   |    |                       |                   |                       |                   |                          |                     |                    |                     |                     |                              |                     |                     |                     |                     |                            |                     |                     |                     |                     |                            |                     |                     |                     |                     |                                                                                                                                                                                                                                                                                                                                                                                                                                                                                                                                                                             |
| Precarious to unemployment                                                 | 2.33 (1.11 to 4.91)                                                      | 1.64 (1.05 to 2.58)                                                                                                   | 1.39 (0.99 to 1.95)                                                                                                                                                                                                                                                                                                                                                                                                                                                                                                                                                                                                                                                                                                                                                                                                                                                                                                                                                                                                                                                                                                                                                                                                                                                                                                                                                                                                                                                                                                                                                                                                                                                                  | 1.83 (1.02 to 3.30)                                                                                                                                                                                                                                                                                                                                                                                                                                                                                                                                                                 |     |                  |                     |                                                   |    |                       |                   |                       |                   |                          |                     |                    |                     |                     |                              |                     |                     |                     |                     |                            |                     |                     |                     |                     |                            |                     |                     |                     |                     |                                                                                                                                                                                                                                                                                                                                                                                                                                                                                                                                                                             |
| Yoon et al. 2017<br><br>Cohort<br><br>This study not included in synthesis | Korean Welfare Panel Study 2011 to 2015<br><br>Age not given             | Insecure employment<br><br>Suicidal ideation (among workers without lifetime suicide ideation at baseline)            | Change in employment status and its association with suicidal ideation among workers without lifetime suicidal ideation at baseline. Odds ratios and 95% confidence intervals. N=3423. Reference is permanent employment at baseline and follow up.<br><br>Full time precarious 2.33 (1.09 to 4.99)*<br>Part time precarious 3.94 (1.46 to 10.64)*<br>Unemployed 1.89 (0.21 to 17.48)<br><br>* p<0.05<br><br>Adjusted for gender, age, marital status, equalised household income, residential area, chronic disease, disability and occupation and baseline depressive symptoms                                                                                                                                                                                                                                                                                                                                                                                                                                                                                                                                                                                                                                                                                                                                                                                                                                                                                                                                                                                                                                                                                                     | No: In those who were in permanent employment at baseline those who were unemployed at follow up were less likely to report suicide ideation than those in full or part time precarious employment. This difference is not statistically significant.<br><br>Data from table 3, page 461<br><table border="1" style="margin-left: auto; margin-right: auto;"> <thead> <tr> <th></th> <th>Suicide ideation</th> <th>No suicide ideation</th> </tr> </thead> <tbody> <tr> <td>Precarious employment (full and part time) n= 706</td> <td>20</td> <td>686</td> </tr> </tbody> </table> |     | Suicide ideation | No suicide ideation | Precarious employment (full and part time) n= 706 | 20 | 686                   |                   |                       |                   |                          |                     |                    |                     |                     |                              |                     |                     |                     |                     |                            |                     |                     |                     |                     |                            |                     |                     |                     |                     |                                                                                                                                                                                                                                                                                                                                                                                                                                                                                                                                                                             |
|                                                                            | Suicide ideation                                                         | No suicide ideation                                                                                                   |                                                                                                                                                                                                                                                                                                                                                                                                                                                                                                                                                                                                                                                                                                                                                                                                                                                                                                                                                                                                                                                                                                                                                                                                                                                                                                                                                                                                                                                                                                                                                                                                                                                                                      |                                                                                                                                                                                                                                                                                                                                                                                                                                                                                                                                                                                     |     |                  |                     |                                                   |    |                       |                   |                       |                   |                          |                     |                    |                     |                     |                              |                     |                     |                     |                     |                            |                     |                     |                     |                     |                            |                     |                     |                     |                     |                                                                                                                                                                                                                                                                                                                                                                                                                                                                                                                                                                             |
| Precarious employment (full and part time) n= 706                          | 20                                                                       | 686                                                                                                                   |                                                                                                                                                                                                                                                                                                                                                                                                                                                                                                                                                                                                                                                                                                                                                                                                                                                                                                                                                                                                                                                                                                                                                                                                                                                                                                                                                                                                                                                                                                                                                                                                                                                                                      |                                                                                                                                                                                                                                                                                                                                                                                                                                                                                                                                                                                     |     |                  |                     |                                                   |    |                       |                   |                       |                   |                          |                     |                    |                     |                     |                              |                     |                     |                     |                     |                            |                     |                     |                     |                     |                            |                     |                     |                     |                     |                                                                                                                                                                                                                                                                                                                                                                                                                                                                                                                                                                             |

| Reference/<br>Study design                         | Data source/<br>Population<br>range | Poor/bad job<br>definition<br>Outcome | Results from paper | <b>Is any job better than no job?</b><br>Where OR has been calculated by OES exposure is bad/poor job, is unadjusted and data used to calculate may have been derived from percentages in study results tables                                                                                           |                       |   |    |                                                    |  |  |
|----------------------------------------------------|-------------------------------------|---------------------------------------|--------------------|----------------------------------------------------------------------------------------------------------------------------------------------------------------------------------------------------------------------------------------------------------------------------------------------------------|-----------------------|---|----|----------------------------------------------------|--|--|
|                                                    |                                     |                                       |                    | <table border="1"> <tr> <td data-bbox="2122 279 2323 338">Unemployment<br/>n= 59</td> <td data-bbox="2323 279 2525 338">1</td> <td data-bbox="2525 279 2736 338">58</td> </tr> <tr> <td colspan="3" data-bbox="2122 338 2736 369">Relative risk 1.67, 95% CI 0.23 to 12.24, p=0.6131</td> </tr> </table> | Unemployment<br>n= 59 | 1 | 58 | Relative risk 1.67, 95% CI 0.23 to 12.24, p=0.6131 |  |  |
| Unemployment<br>n= 59                              | 1                                   | 58                                    |                    |                                                                                                                                                                                                                                                                                                          |                       |   |    |                                                    |  |  |
| Relative risk 1.67, 95% CI 0.23 to 12.24, p=0.6131 |                                     |                                       |                    |                                                                                                                                                                                                                                                                                                          |                       |   |    |                                                    |  |  |

**Table S2: Results by objectivity of outcome measure**

| Reference                               | Outcome                                                     | Is any job better than no job?                                             |                                                                                                                                                                    |                                                                                  |
|-----------------------------------------|-------------------------------------------------------------|----------------------------------------------------------------------------|--------------------------------------------------------------------------------------------------------------------------------------------------------------------|----------------------------------------------------------------------------------|
|                                         |                                                             | Poor job significantly better                                              | No significant difference                                                                                                                                          | Poor job significantly worse                                                     |
| <b>OBJECTIVE MEASURES</b>               |                                                             |                                                                            |                                                                                                                                                                    |                                                                                  |
| Chandola and Zhang 2018                 | Allostatic load – biomarkers related to chronic stress      |                                                                            |                                                                                                                                                                    | ✓ allostatic load transition into poor quality job vs remaining unemployed       |
| Guseva Canu et al. 2019                 | Suicide                                                     | ✓ death from suicide, lowest skilled and unskilled employees vs unemployed |                                                                                                                                                                    |                                                                                  |
| Kim et al. 2020                         | Biomarker C-reactive protein                                |                                                                            | ✓ C-reactive protein unemployment vs temporary job                                                                                                                 |                                                                                  |
| Sumner et al. 2020                      | Biomarkers C-reactive protein and fibrinogen                |                                                                            | ✓ C-reactive protein or fibrinogen, unemployment vs temporary job                                                                                                  |                                                                                  |
| <b>VALIDATED MEASURES – SELF-REPORT</b> |                                                             |                                                                            |                                                                                                                                                                    |                                                                                  |
| Butterworth et al. 2013                 | Common mental disorders (CIS-R)                             |                                                                            | ✓ common mental disorders (CIS-R), poorest quality jobs vs unemployed                                                                                              |                                                                                  |
| Butterworth et al. 2011                 | Mental health (MHI from SF-36)                              |                                                                            |                                                                                                                                                                    | ✓ decline in mental health over time (SF-36), poorest quality jobs vs unemployed |
| Chandola and Zhang 2018                 | Physical and mental wellbeing (component scores from SF-36) |                                                                            | ✓ SF-12 mental component score transition into poor quality work vs remaining unemployed<br>✓ GHQ-12 score transition into low quality job vs remaining unemployed |                                                                                  |
| Cortes-Franch et al. 2019               | Mental wellbeing (WHO-5)                                    | ✓ mental well-being (WHO-5) women, unemployed vs low quality job           | ✓ mental well-being (WHO-5) men, unemployed vs low quality job                                                                                                     |                                                                                  |

| Reference                                                                                     | Outcome                                                                         | Is any job better than no job?                                                                                                                                                                                                             |                                                                                                                                                                                                                                                             |                              |
|-----------------------------------------------------------------------------------------------|---------------------------------------------------------------------------------|--------------------------------------------------------------------------------------------------------------------------------------------------------------------------------------------------------------------------------------------|-------------------------------------------------------------------------------------------------------------------------------------------------------------------------------------------------------------------------------------------------------------|------------------------------|
|                                                                                               |                                                                                 | Poor job significantly better                                                                                                                                                                                                              | No significant difference                                                                                                                                                                                                                                   | Poor job significantly worse |
|                                                                                               | well-being index)                                                               |                                                                                                                                                                                                                                            |                                                                                                                                                                                                                                                             |                              |
| Cortes-Franch et al. 2018                                                                     | Mental health (GHQ-12)                                                          | <ul style="list-style-type: none"> <li>✓ mental health (GHQ-12) men with a temporary contract vs unemployed (any length of time)</li> <li>✓ mental health (GHQ-12) men with no contract vs unemployed <math>\leq 2</math> years</li> </ul> | <ul style="list-style-type: none"> <li>✓ mental health (GHQ-12) men with no contract vs unemployed &gt; 2 years</li> <li>✓ mental health (GHQ-12) women no or temporary contract vs any length of unemployment</li> </ul>                                   |                              |
| Fiori et al. 2016                                                                             | Mental health (SF 12-MHI)                                                       |                                                                                                                                                                                                                                            | <ul style="list-style-type: none"> <li>✓ unable to establish significance, mental health (SF-12) fixed term or atypical contract vs looking for a new job</li> </ul>                                                                                        |                              |
| Flint et al. 2013                                                                             | Psychological wellbeing (GHQ-12)                                                | <ul style="list-style-type: none"> <li>✓ lower level of psychological wellbeing (GHQ-12) spell of insecure employment vs spell of unemployment</li> </ul>                                                                                  |                                                                                                                                                                                                                                                             |                              |
| Jang et al. 2015                                                                              | Severe depressive symptoms (CES-D)                                              | <ul style="list-style-type: none"> <li>✓ severe depressive symptoms (CES-D) transition to precarious employment vs transition to unemployment</li> </ul>                                                                                   |                                                                                                                                                                                                                                                             |                              |
| Yoo et al. 2016                                                                               | Depression (CES-D)                                                              |                                                                                                                                                                                                                                            | <ul style="list-style-type: none"> <li>✓ depression (CES-D), precarious employment vs unemployment</li> <li>✓ depression (CES-D), transition from unemployment to precarious employment vs transition from precarious employment to unemployment</li> </ul> |                              |
| <b>MIXED – VALIDATED TOOL, SELF-REPORT AND SUBJECTIVE MEASURES (NOT USING VALIDATED TOOL)</b> |                                                                                 |                                                                                                                                                                                                                                            |                                                                                                                                                                                                                                                             |                              |
| Gebel and Vosemer 2014                                                                        | Psychological and physical health (SF-12 and self-report)                       | <ul style="list-style-type: none"> <li>✓ psychological health (SF-12) transition from temporary work to unemployment</li> </ul>                                                                                                            | <ul style="list-style-type: none"> <li>✓ physical health (self-report) transition from temporary work to unemployment</li> </ul>                                                                                                                            |                              |
| Grzywacz and Dooley 2003                                                                      | Physical health (self report)<br>Depression (Composite International Diagnostic | <ul style="list-style-type: none"> <li>✓ for fair/poor health (self-report) inadequate employment vs unemployment</li> </ul>                                                                                                               | <ul style="list-style-type: none"> <li>✓ for depression (CIDI-SF) inadequate employment vs unemployment</li> </ul>                                                                                                                                          |                              |

| Reference                                                           | Outcome                                                                            | Is any job better than no job?                                                                                                                                                                                                                                                   |                                                                                                                                                                                                                                                                             |                                                                                                                                             |
|---------------------------------------------------------------------|------------------------------------------------------------------------------------|----------------------------------------------------------------------------------------------------------------------------------------------------------------------------------------------------------------------------------------------------------------------------------|-----------------------------------------------------------------------------------------------------------------------------------------------------------------------------------------------------------------------------------------------------------------------------|---------------------------------------------------------------------------------------------------------------------------------------------|
|                                                                     |                                                                                    | Poor job significantly better                                                                                                                                                                                                                                                    | No significant difference                                                                                                                                                                                                                                                   | Poor job significantly worse                                                                                                                |
|                                                                     | Interview – short form)                                                            |                                                                                                                                                                                                                                                                                  |                                                                                                                                                                                                                                                                             |                                                                                                                                             |
| Inanc 2018                                                          | Psychological wellbeing (GHQ-12) and life satisfaction (single survey question)    | <ul style="list-style-type: none"> <li>✓ husbands own psychological well-being (GHQ-12) and life satisfaction (self-report) temporary employment vs unemployed</li> <li>✓ wives own psychological well-being and life satisfaction temporary employment vs unemployed</li> </ul> | <ul style="list-style-type: none"> <li>✓ impact of husbands temporary employment on wives psychological well-being and life satisfaction vs unemployed</li> <li>✓ impact of wives temporary employment on husbands life satisfaction vs unemployed</li> </ul>               | <ul style="list-style-type: none"> <li>✓ impact of wives temporary employment on husbands psychological well-being vs unemployed</li> </ul> |
| Park et al. 2020                                                    | Mental health (PHQ-9), general health (EuroQol-5D, health behaviours (self report) | <ul style="list-style-type: none"> <li>✓ perceived poor health (EuroQol-5D) and health related quality of life temporary employment vs unemployment</li> </ul>                                                                                                                   | <ul style="list-style-type: none"> <li>✓ self-reported smoking, high daily perceived stress, ever diagnosed with depression, depression symptoms (PHQ-9), suicide attempt, planning or ideation, mental health service use, temporary employment vs unemployment</li> </ul> | <ul style="list-style-type: none"> <li>✓ risky alcohol consumption (self-report), temporary employment vs unemployment</li> </ul>           |
| <b>SUBJECTIVE MEASURES – SELF-REPORT NOT USING A VALIDATED TOOL</b> |                                                                                    |                                                                                                                                                                                                                                                                                  |                                                                                                                                                                                                                                                                             |                                                                                                                                             |
| Bently et al. 2020                                                  | Smoking (yes/no), drinking (yes/no), risky drinking (number of drinks per week)    |                                                                                                                                                                                                                                                                                  | <ul style="list-style-type: none"> <li>✓ smoking, drinking and risky drinking insecure employment vs unemployment</li> </ul>                                                                                                                                                |                                                                                                                                             |
| Fornell et al. 2018                                                 | General health (self-report)                                                       |                                                                                                                                                                                                                                                                                  | <ul style="list-style-type: none"> <li>✓ self-reported bad health unemployment vs precarious employment</li> </ul>                                                                                                                                                          |                                                                                                                                             |
| Griep et al. 2016                                                   | Psychological complaints, self-rated health, life satisfaction (all self report)   | <ul style="list-style-type: none"> <li>✓ life satisfaction (self-report) insecure employment vs short or long term unemployment</li> </ul>                                                                                                                                       | <ul style="list-style-type: none"> <li>✓ psychological complaints (self-report), insecure employment vs long term unemployment</li> <li>✓ self-rated health insecure employment vs short or long term unemployment</li> </ul>                                               | <ul style="list-style-type: none"> <li>✓ psychological complaints (self-report) insecure employment vs short term unemployment</li> </ul>   |



| Reference                              | Outcome                                              | Is any job better than no job?                                                                                                                                                                                                                                      |                                                                                                                                                                                                                                                                                                                        |                                                                                                                                                                                      |
|----------------------------------------|------------------------------------------------------|---------------------------------------------------------------------------------------------------------------------------------------------------------------------------------------------------------------------------------------------------------------------|------------------------------------------------------------------------------------------------------------------------------------------------------------------------------------------------------------------------------------------------------------------------------------------------------------------------|--------------------------------------------------------------------------------------------------------------------------------------------------------------------------------------|
|                                        |                                                      | Poor job significantly better                                                                                                                                                                                                                                       | No significant difference                                                                                                                                                                                                                                                                                              | Poor job significantly worse                                                                                                                                                         |
|                                        |                                                      |                                                                                                                                                                                                                                                                     | <ul style="list-style-type: none"> <li>✓ subjective complaints insecure employment vs long or short term employment</li> </ul>                                                                                                                                                                                         |                                                                                                                                                                                      |
| Kim et al. 2019                        | Suicidal ideation in the past year (single question) | <ul style="list-style-type: none"> <li>✓ suicide ideation remained in precarious employment vs those who remained unemployed</li> <li>✓ suicide ideation remained in precarious employment vs those who moved from precarious employment to unemployment</li> </ul> | <ul style="list-style-type: none"> <li>✓ suicide ideation transitioned from unemployment to precarious employment vs those who transitioned from precarious employment to unemployment</li> <li>✓ suicide ideation transitioned from unemployment to precarious employment vs those who remained unemployed</li> </ul> |                                                                                                                                                                                      |
| Maeda et al. 2019                      | Insomnia related symptoms (self report)              | <ul style="list-style-type: none"> <li>✓ insomnia related symptoms, not regularly employed vs unemployed</li> </ul>                                                                                                                                                 |                                                                                                                                                                                                                                                                                                                        |                                                                                                                                                                                      |
| Matilla-Santander et al. 2020          | Bad health, health problems (self report)            | <ul style="list-style-type: none"> <li>✓ for bad health status (self-report) unemployed vs precarious employment</li> </ul>                                                                                                                                         | <ul style="list-style-type: none"> <li>✓ for hearing problems, skin problems, anxiety, backache and muscular pain in lower limbs (self-report) unemployed vs precarious employment</li> </ul>                                                                                                                          | <ul style="list-style-type: none"> <li>✓ for headaches or eyestrain, fatigue, muscular pain in upper limbs and injuries (self-report) unemployed vs precarious employment</li> </ul> |
| Minelli et al 2014                     | General health (self report)                         | <ul style="list-style-type: none"> <li>✓ perceived health (self-report), unemployed vs temporary employment</li> </ul>                                                                                                                                              |                                                                                                                                                                                                                                                                                                                        |                                                                                                                                                                                      |
| Scheuring et al. 2021                  | Life satisfaction (self-report)                      | <ul style="list-style-type: none"> <li>✓ life satisfaction for women associated with their partners transition from unemployment to fixed term employment</li> </ul>                                                                                                | <ul style="list-style-type: none"> <li>✓ life satisfaction for men associated with their partners transition from unemployment to fixed term employment</li> </ul>                                                                                                                                                     |                                                                                                                                                                                      |
| Van Aerden, Gadeyne and Vanrolen. 2017 | Mental health, general health (both self report)     |                                                                                                                                                                                                                                                                     | <ul style="list-style-type: none"> <li>✓ general and mental health (self-report), precarious job vs unemployment</li> </ul>                                                                                                                                                                                            |                                                                                                                                                                                      |

**Table S3: Results by welfare state regime**

| Reference                                  | Is any job better than no job?                                                                                                                                                                                               |                                                                                                                                                                                                           |                                                                                           |
|--------------------------------------------|------------------------------------------------------------------------------------------------------------------------------------------------------------------------------------------------------------------------------|-----------------------------------------------------------------------------------------------------------------------------------------------------------------------------------------------------------|-------------------------------------------------------------------------------------------|
|                                            | Poor job significantly better                                                                                                                                                                                                | No significant difference                                                                                                                                                                                 | Poor job significantly worse                                                              |
| <b>LIBERAL (UK AND IRELAND)</b>            |                                                                                                                                                                                                                              |                                                                                                                                                                                                           |                                                                                           |
| Butterworth et al. 2013                    |                                                                                                                                                                                                                              | ✓ common mental disorders (CIS-R), poorest quality jobs vs unemployed                                                                                                                                     |                                                                                           |
| Chandola and Zhang 2018                    |                                                                                                                                                                                                                              | ✓ SF-12 mental component score transition into poor quality work vs remaining unemployed<br>✓ GHQ-12 score transition into low quality job vs remaining unemployed                                        | ✓ allostatic load transition into poor quality job vs remaining unemployed                |
| Cortes-Franch et al. 2019                  | ✓ mental well-being (WHO-5) women, unemployed vs low quality job                                                                                                                                                             | ✓ mental well-being (WHO-5) men, unemployed vs low quality job                                                                                                                                            |                                                                                           |
| Flint et al. 2013                          | ✓ lower level of psychological wellbeing (GHQ-12) spell of insecure employment vs spell of unemployment                                                                                                                      |                                                                                                                                                                                                           |                                                                                           |
| Inanc 2018                                 | ✓ husbands own psychological well-being (GHQ-12) and life satisfaction (self-report) temporary employment vs unemployed<br><br>✓ wives own psychological well-being and life satisfaction temporary employment vs unemployed | ✓ impact of husbands temporary employment on wives psychological well-being and life satisfaction vs unemployed<br><br>✓ impact of wives temporary employment on husbands life satisfaction vs unemployed | ✓ impact of wives temporary employment on husbands psychological well-being vs unemployed |
| Sumner et al. 2020                         |                                                                                                                                                                                                                              | ✓ C-reactive protein or fibrinogen, unemployment vs temporary job                                                                                                                                         |                                                                                           |
| <b>SOUTHERN EUROPEAN (ITALY AND SPAIN)</b> |                                                                                                                                                                                                                              |                                                                                                                                                                                                           |                                                                                           |
| Cortes-Franch et al. 2018                  | ✓ mental health (GHQ-12) men with a temporary contract<br><br>✓ mental health (GHQ-12) men with no contract vs unemployed > 2 years                                                                                          | ✓ mental health (GHQ-12) men with no contract vs unemployed ≤ 2 years<br><br>✓ mental health (GHQ-12) women no or temporary contract any length of unemployment                                           |                                                                                           |

| Reference                                              | Is any job better than no job?                                                               |                                                                                                                                                                                                                                                               |                                                                                         |
|--------------------------------------------------------|----------------------------------------------------------------------------------------------|---------------------------------------------------------------------------------------------------------------------------------------------------------------------------------------------------------------------------------------------------------------|-----------------------------------------------------------------------------------------|
|                                                        | Poor job significantly better                                                                | No significant difference                                                                                                                                                                                                                                     | Poor job significantly worse                                                            |
| Fiori et al. 2016                                      |                                                                                              | ✓ unable to establish significance, mental health (SF-12) fixed term or atypical contract vs looking for a new job                                                                                                                                            |                                                                                         |
| Fornell et al. 2018                                    |                                                                                              | ✓ self-reported bad health unemployment vs precarious employment                                                                                                                                                                                              |                                                                                         |
| Minelli et al. 2014                                    | ✓ perceived health (self-report), unemployed vs temporary employment                         |                                                                                                                                                                                                                                                               |                                                                                         |
| <b>CONSERVATIVE (SWITZERLAND, GERMANY AND BELGIUM)</b> |                                                                                              |                                                                                                                                                                                                                                                               |                                                                                         |
| Gebel and Vosemer 2014                                 | ✓ psychological health (SF-12) transition from temporary work to unemployment                | ✓ physical health (self-report) transition from temporary work to unemployment                                                                                                                                                                                |                                                                                         |
| Guseva Canu et al. 2019                                | ✓ death from suicide, lowest skilled and unskilled employees vs unemployed                   |                                                                                                                                                                                                                                                               |                                                                                         |
| Scheuring et al. 2021                                  | ✓ life satisfaction for women partners transition from unemployment to fixed term employment | ✓ life satisfaction for men partners transition from unemployment to fixed term employment                                                                                                                                                                    |                                                                                         |
| Van Aerden, Gadeyne and Vanrolen 2017                  |                                                                                              | ✓ general and mental health (self-report), precarious job vs unemployment                                                                                                                                                                                     |                                                                                         |
| <b>SOCIAL DEMOCRATIC (FINLAND)</b>                     |                                                                                              |                                                                                                                                                                                                                                                               |                                                                                         |
| Griep et al. 2016                                      | ✓ life satisfaction (self-report) insecure employment vs short or long term unemployment     | ✓ psychological complaints (self-report), insecure employment vs long term unemployment<br><br>✓ self-rated health insecure employment vs short or long term unemployment<br><br>✓ subjective complaints insecure employment vs long or short term employment | ✓ psychological complaints (self-report) insecure employment vs short term unemployment |
